# Supplementary material for: The Influence of Strain on the Rotation of an Artificial Molecular Motor
Source: PubMed Central journal article supplement — Angew Chem Int Ed Engl. 2022 Jul 13;61(34):e202205801. doi: 10.1002/anie.202205801 (PMC9544085; doi:10.1002/anie.202205801), 2022-07-13

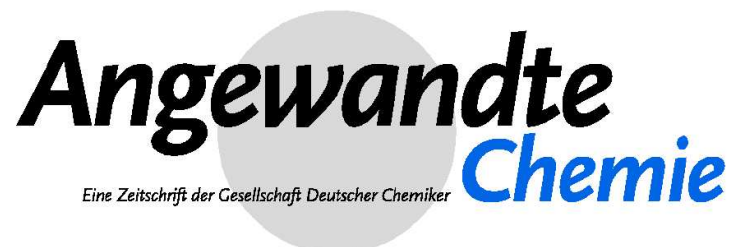

## Supporting Information

### **The Influence of Strain on the Rotation of an Artificial Molecular Motor**

*M. Kathan\*, S. Crespi, A. Troncossi, C. N. Stindt, R. Toyoda, B. L. Feringa\**

## General

Chemicals were purchased from commercial sources and used without purification. If not stated otherwise, all reactions were carried out in dried glassware under a nitrogen atmosphere using standard Schlenk techniques. For NMR experiments, solvents were added using glass syringes and stainless steel needles (stored at 80 °C). Analytical thin layer chromatography (TLC) was performed on silica gel 60 G/UV254 aluminium sheets from Merck (0.25 mm). Flash column chromatography was performed on silica gel Davisil LC60A (Merck type 9385, 230–400 mesh) or Reveleris X2 Flash Chromatography system (MPLC) using the indicated solvents. NMR spectra were recorded on a Varian Mercury Plus ( $^1\text{H}$ : 400 MHz,  $^{13}\text{C}$ : 101 MHz) or a Varian Unity Plus ( $^1\text{H}$ : 500 MHz). Chemical shifts ( $\delta$ ) are given in parts per million (ppm) relative to TMS. For the calibration of the chemical shift, the residual solvent resonance was used as the internal standard. Data are reported as follows: chemical shift ( $\delta$  in ppm), multiplicity (s = singlet, d = doublet, t = triplet, p = pentet, m = multiplet), coupling constants ( $J$  in Hz). High resolution mass spectra (HRMS) were recorded on an LTQ Orbitrap XL. UV/vis absorption spectra were recorded on an Agilent Cary 8454 spectrometer in 1 cm quartz cuvettes. Single crystals were measured on a Bruker-AXS D8 Venture diffractometer. Illuminations were carried out using a UV lamp from Vilber Lourmat (6 W,  $\lambda_{\text{irr}} = 313$  or 365 nm) or a LED from THORLABS (LED M300F2,  $\lambda_{\text{irr}} = 300$  nm).

## Synthesis

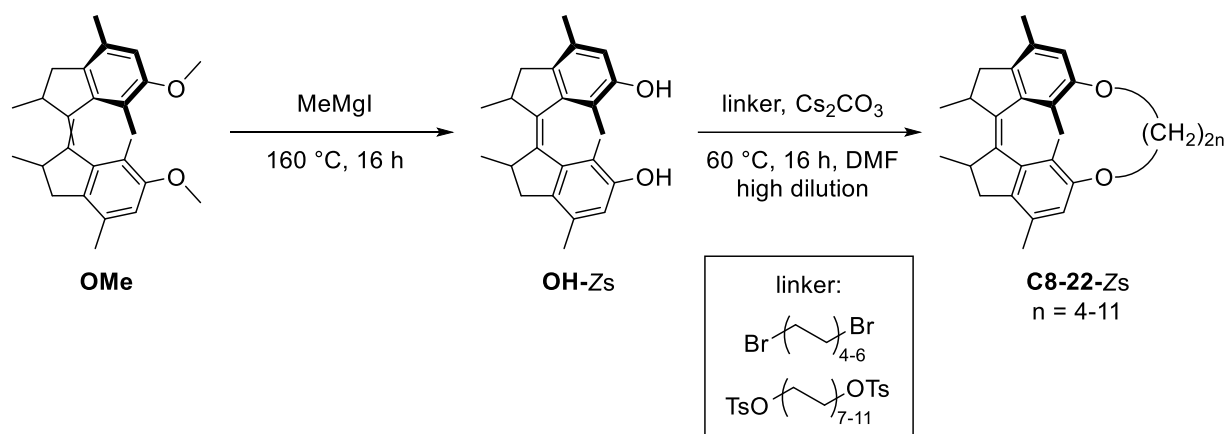

Ditosylates<sup>[1]</sup> (1,14-ditosyltetradecane, 1,16-ditosylhexadecane, 1,18-ditosyloctadecane, 1,20-ditosylicosane and 1,22-ditosyldocosane) and dihydroxy motor **OH-Zs**<sup>[2]</sup> were prepared according to literature procedures.

**General procedure for the synthesis of macrocycles C8-22-Zs:** Under a nitrogen atmosphere, a Schlenk flask was charged with  $\text{Cs}_2\text{CO}_3$  (3.7 eq.), dihydroxy motor **OH-Zs** (1.0 eq.) and dry DMF (10 mM) and the reaction mixture was heated to  $60\text{ }^\circ\text{C}$ .<sup>[3,4]</sup> Then, a solution of dibromide/ditosylate (1.0 eq.) in dry DMF/THF (23 mM) was added to the suspension over the course of 5 h. After stirring the reaction mixture for additional 16 h at  $60\text{ }^\circ\text{C}$ , the solvent was removed in vacuum, the residue was redissolved in DCM, extensively washed with water and dried over  $\text{MgSO}_4$ . Macrocycles **C8-C22-Zs** were purified by flash column or preparative thin-layer chromatography.

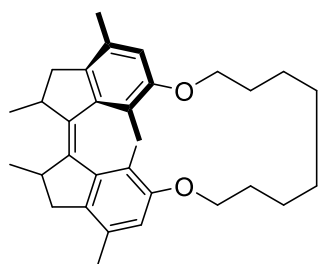

**C8-Zs:** According to the general procedure, a Schlenk flask was charged with  $\text{Cs}_2\text{CO}_3$  (273 mg, 0.838 mmol), dihydroxy motor **OH-Zs** (80 mg, 0.230 mmol) and dry DMF (23 mL). 1,8-Dibromooctane (63 mg, 0.230 mmol) was dissolved in dry DMF (9.8 mL). Purification by preparative thin-layer chromatography (pentane/DCM 80:20) afforded **C8-Zs** as a colorless solid (34.8 mg, 33%).  $^1\text{H NMR}$  (400 MHz,  $\text{CDCl}_3$ )  $\delta$  = 6.54 (s, 2H), 4.21–4.17 (m, 2H), 3.86–3.81 (m, 2H), 3.33 (*pseudo-p*,  $J$  = 6.7 Hz, 2H), 3.04 (dd,  $J$  = 14.6, 6.3 Hz, 2H), 2.38 (d,  $J$  = 14.6 Hz, 2H), 2.24 (s, 6H), 1.91–1.80 (m, 2H), 1.66–1.56 (m, 4H), 1.52–1.43 (m, 2H), 1.42–1.24 (m, 12H), 1.09 (d,  $J$  = 6.8 Hz, 6H) ppm.  $^{13}\text{C NMR}$  (101 MHz,  $\text{CDCl}_3$ )  $\delta$  = 156.5, 142.1, 141.0, 136.0, 130.6, 122.7, 112.6, 68.2, 41.7, 38.3, 28.8, 28.4, 25.9, 20.6, 18.9, 14.6 ppm. **HRMS-ESI** (ESI+):  $m/z$  calculated for  $\text{C}_{32}\text{H}_{42}\text{O}_2^+$  ( $[\text{M}]^+$ ): 458.3179, found 458.3170.

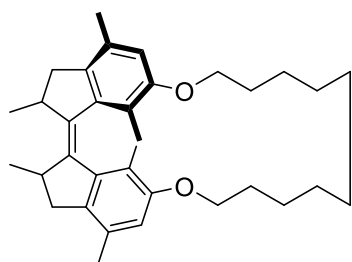

**C10-Zs:** According to the general procedure, a Schlenk flask was charged with  $\text{Cs}_2\text{CO}_3$  (273 mg, 0.838 mmol), dihydroxy motor **OH-Zs** (80 mg, 0.230 mmol) and dry DMF (23 mL). 1,10-Dibromodecane (69 mg, 0.230 mmol) was dissolved in dry DMF (9.8 mL). Purification by preparative thin-layer chromatography (pentane/DCM 80:20) afforded **C10-Zs** as a colorless solid (40.2 mg, 36%).  $^1\text{H NMR}$  (400 MHz,  $\text{CDCl}_3$ )  $\delta$  = 6.57 (s, 2H), 4.02–3.94 (m, 4H), 3.34 (*pseudo-p*,  $J$  = 6.7 Hz, 2H), 3.04 (dd,  $J$  = 14.5, 6.3 Hz, 2H), 2.39 (d,  $J$  = 14.5 Hz, 2H), 2.26 (s, 6H), 1.84–1.65 (m, 4H), 1.63–1.32 (m, 20H), 1.09 (d,  $J$  = 6.7 Hz, 6H) ppm.  $^{13}\text{C NMR}$  (101 MHz,  $\text{CDCl}_3$ )  $\delta$  = 156.0, 142.1, 141.0, 136.1, 130.5, 122.8, 112.1, 68.4, 42.0, 38.1, 28.9, 28.1, 27.8, 25.9, 20.7, 19.0, 14.6 ppm. **HRMS-ESI** (ESI+):  $m/z$  calculated for  $\text{C}_{34}\text{H}_{46}\text{O}_2^+$  ( $[\text{M}]^+$ ): 486.3492, found 486.3482.

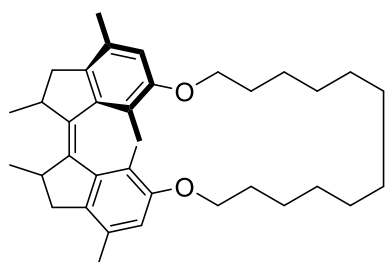

**C12-Zs:** According to the general procedure, a Schlenk flask was charged with  $\text{Cs}_2\text{CO}_3$  (273 mg, 0.838 mmol), dihydroxy motor **OH-Zs** (80 mg, 0.230 mmol) and dry DMF (23 mL). 1,12-Dibromododecane (75 mg, 0.230 mmol) was dissolved in dry DMF (9.8 mL). Purification by preparative thin-layer chromatography (pentane/DCM 80:20) afforded **C12-Zs** as a colorless solid (45.1 mg, 38%).  $^1\text{H NMR}$  (400 MHz,  $\text{CDCl}_3$ )  $\delta$  = 6.57 (s, 2H), 4.01–3.96 (m, 2H), 3.93–3.88 (m, 2H), 3.34 (*pseudo-p*,  $J$  = 6.7 Hz, 2H), 3.05 (dd,  $J$  = 14.5, 6.3 Hz, 2H), 2.38 (d,  $J$  = 14.5 Hz, 2H), 2.26 (s, 6H), 1.82–1.66 (m, 4H), 1.54–1.25 (m, 22H), 1.09 (d,  $J$  = 6.7 Hz, 6H) ppm.  $^{13}\text{C NMR}$  (101 MHz,  $\text{CDCl}_3$ )  $\delta$  = 156.1, 142.1, 141.1, 136.2, 130.5, 122.9, 112.2, 68.7, 42.1, 38.1, 29.5, 28.1, 27.9, 27.4, 25.6, 20.7, 19.0, 14.4 ppm. **HRMS-ESI** (ESI+):  $m/z$  calculated for  $\text{C}_{36}\text{H}_{50}\text{O}_2^+$  ( $[\text{M}]^+$ ): 514.3805, found 514.3792.

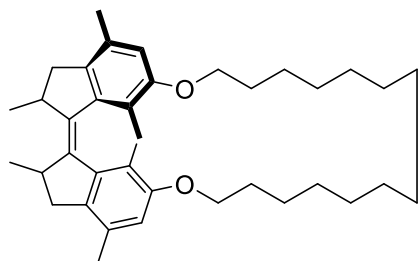

**C14-Zs:** According to the general procedure, a Schlenk flask was charged with  $\text{Cs}_2\text{CO}_3$  (273 mg, 0.838 mmol), dihydroxy motor **OH-Zs** (80 mg, 0.230 mmol) and dry DMF (23 mL). 1,14-Ditosyltetradecane (124 mg, 0.230 mmol) was dissolved in dry DMF (9.8 mL). Purification by preparative thin-layer chromatography (pentane/DCM 80:20) afforded **C14-Zs** as a colorless solid (46.3 mg, 37%).  $^1\text{H NMR}$  (400 MHz,  $\text{CDCl}_3$ )  $\delta$  = 6.55 (s, 2H), 4.05–3.93 (m, 2H), 3.90–3.82 (m, 2H), 3.32 (*pseudo-p*,  $J$  = 6.7 Hz, 2H), 3.03 (dd,  $J$  = 14.5, 6.3 Hz, 2H), 2.37 (d,  $J$  = 14.5 Hz, 2H), 2.24 (s, 6H), 1.83–1.63 (m, 4H), 1.55 (s, 6H), 1.51–1.28 (m, 26H), 1.07 (d,  $J$  = 6.7 Hz, 6H) ppm.  $^{13}\text{C NMR}$  (101 MHz,  $\text{CDCl}_3$ )  $\delta$  = 156.2, 142.2, 141.1, 136.2, 130.5, 122.9, 112.3, 69.0, 42.0, 38.1, 29.8, 28.6, 28.3, 27.6, 27.4, 25.7, 20.7, 19.0, 14.5 ppm. **HRMS-ESI** (ESI+):  $m/z$  calculated for  $\text{C}_{38}\text{H}_{55}\text{O}_2^+$  ( $[\text{M}+\text{H}]^+$ ): 543.4224, found 543.4225.

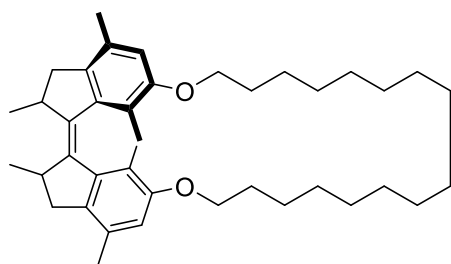

**C16-Zs:** According to the general procedure, a Schlenk flask was charged with  $\text{Cs}_2\text{CO}_3$  (273 mg, 0.838 mmol), dihydroxy motor **OH-Zs** (80 mg, 0.230 mmol) and dry DMF (23 mL). 1,16-Ditosylhexadecane (130 mg, 0.230 mmol) was dissolved in dry DMF (9.8 mL). Purification by preparative thin-layer chromatography (pentane/DCM 80:20) afforded **C16-Zs** as a colorless solid (45.0 mg, 34%).  $^1\text{H NMR}$  (400 MHz,  $\text{CDCl}_3$ )  $\delta$  = 6.56 (s, 2H), 3.99–3.94 (m, 2H), 3.88–3.83 (m, 2H), 3.33 (*pseudo-p*,  $J$  = 6.7 Hz, 2H), 3.04 (dd,  $J$  = 14.5, 6.3 Hz, 2H), 2.38 (d,  $J$  = 14.5 Hz, 2H), 2.25 (s, 6H), 1.82–1.67 (m, 4H), 1.52–1.28 (m, 30H), 1.08 (d,  $J$  = 6.7 Hz, 6H) ppm.  $^{13}\text{C NMR}$  (101 MHz,  $\text{CDCl}_3$ )  $\delta$  = 156.2, 142.2, 141.1, 136.2, 130.5, 122.9, 112.4, 69.2, 42.0, 38.2, 29.8, 29.1, 28.5, 28.2, 28.1, 27.5, 25.9, 20.7, 18.9, 14.5 ppm. **HRMS-ESI** (ESI+):  $m/z$  calculated for  $\text{C}_{40}\text{H}_{58}\text{O}_2^+$  ( $[\text{M}]^+$ ): 570.4431, found 570.4418.

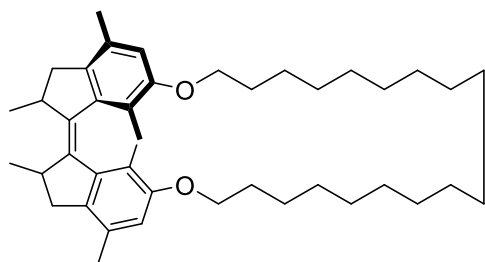

**C18-Zs:** According to the general procedure, a Schlenk flask was charged with  $\text{Cs}_2\text{CO}_3$  (137 mg, 0.419 mmol), dihydroxy motor **OH-Zs** (40 mg, 0.115 mmol) and dry DMF (12 mL). 1,18-Ditosyloctadecane (68 mg, 0.115 mmol) was dissolved in dry DMF (5 mL). Purification by flash column chromatography (pentane/EtOAc 99:1) and subsequent precipitation and filtration of oligomeric side products from a solution in chloroform by slow addition of methanol afforded **C18-Zs** as a colorless solid (40.0 mg, 58%).  $^1\text{H NMR}$  (400 MHz,  $\text{CDCl}_3$ )  $\delta$  = 6.55 (s, 2H), 3.98–3.92 (m, 2H), 3.88–3.78 (m, 2H), 3.32 (*pseudo-p*,  $J$  = 6.5 Hz, 2H), 3.03 (dd,  $J$  = 14.5, 6.2 Hz, 2H), 2.37 (d,  $J$  = 14.5 Hz, 2H), 2.24 (s, 6H), 1.81–1.68 (m, 4H), 1.50–1.27 (m, 34H), 1.06 (d,  $J$  = 6.8 Hz, 6H) ppm.  $^{13}\text{C NMR}$  (101 MHz,  $\text{CDCl}_3$ )  $\delta$  = 156.1, 142.2, 141.1, 136.2, 130.5, 122.8, 112.4, 69.3, 42.0, 38.2, 29.8, 29.4, 28.8, 28.8, 28.6, 28.1, 27.9, 26.0, 20.7, 19.0, 14.4 ppm. **HRMS-ESI** (ESI+):  $m/z$  calculated for  $\text{C}_{42}\text{H}_{62}\text{O}_2^+$  ( $[\text{M}]^+$ ): 598.4744, found 598.4728.

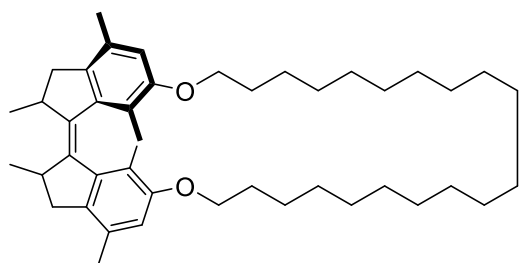

**C20-Zs:** According to the general procedure, a Schlenk flask was charged with  $\text{Cs}_2\text{CO}_3$  (137 mg, 0.419 mmol), dihydroxy motor **OH-Zs** (40 mg, 0.115 mmol) and dry DMF (12 mL). 1,20-Ditosylicosane (72 mg, 0.115 mmol) was dissolved in dry DMF/THF (5 mL, 4:1). Purification by flash column chromatography (pentane/EtOAc 99:1) and subsequent precipitation and filtration of oligomeric side products from a solution in chloroform by slow addition of methanol afforded **C20-Zs** as a colorless solid (31.3 mg, 44%).  $^1\text{H NMR}$  (400 MHz,  $\text{CDCl}_3$ )  $\delta$  = 6.54 (s, 2H), 4.01–3.90 (m, 2H), 3.88–3.78 (m, 2H), 3.32 (*pseudo-p*,  $J$  = 6.7 Hz, 2H), 3.03 (dd,  $J$  = 14.4, 6.2 Hz, 2H), 2.36 (d,  $J$  = 14.5 Hz, 2H), 2.24 (s, 6H), 1.88–1.69 (m, 4H), 1.44–1.29 (m, 38H), 1.06 (d,  $J$  = 6.7 Hz, 6H) ppm.  $^{13}\text{C NMR}$  (101 MHz,  $\text{CDCl}_3$ )  $\delta$  = 156.1, 142.2, 141.1, 136.2, 130.5, 122.8, 112.3, 69.3, 42.0, 38.2, 29.8, 29.4, 29.2, 29.1, 28.8, 28.5, 28.4, 28.1, 26.1, 20.7, 19.0, 14.4 ppm. **HRMS-ESI** (ESI+):  $m/z$  calculated for  $\text{C}_{44}\text{H}_{66}\text{O}_2^+$  ( $[\text{M}]^+$ ): 626.5057, found 626.5045.

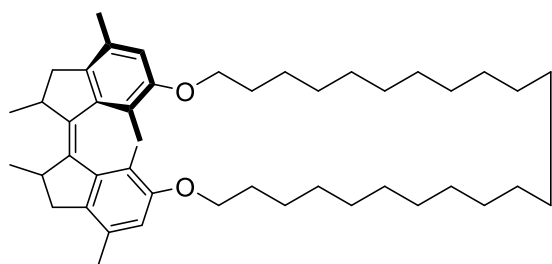

**C22-Zs:** According to the general procedure, a Schlenk flask was charged with  $\text{Cs}_2\text{CO}_3$  (137 mg, 0.419 mmol), dihydroxy motor **OH-Zs** (40 mg, 0.115 mmol) and dry DMF (12 mL). 1,22-Ditosyldocosane (75 mg, 0.115 mmol) was dissolved in dry DMF/THF (5 mL, 3:1). Purification by flash column chromatography (pentane/EtOAc 99:1) and subsequent precipitation and filtration of oligomeric side products from a solution in chloroform by slow addition of methanol afforded **C22-Zs** as a colorless solid (33.7 mg, 45%).  $^1\text{H NMR}$  (400 MHz,  $\text{CDCl}_3$ )  $\delta$  = 6.54 (s, 2H), 3.98–3.93

(m,  $J = 6.8$  Hz, 2H), 3.90–3.77 (m, 2H), 3.32 (*pseudo-p*,  $J = 6.5$  Hz, 2H), 3.03 (dd,  $J = 14.5, 6.2$  Hz, 2H), 2.37 (d,  $J = 14.5$  Hz, 2H), 2.24 (s, 6H), 1.79–1.69 (m, 4H), 1.45–21.25(m, 42H), 1.06 (d,  $J = 6.8$  Hz, 6H) ppm.  **$^{13}\text{C}$  NMR** (101 MHz,  $\text{CDCl}_3$ )  $\delta = 156.1, 142.2, 141.1, 136.2, 130.5, 122.8, 112.3, 69.2, 42.0, 38.2, 29.8, 29.49, 29.4, 29.3, 29.0, 28.8, 28.8, 28.4, 28.3, 26.2, 20.7, 19.0, 14.4$  ppm. **HRMS-ESI** (ESI+):  $m/z$  calculated for  $\text{C}_{46}\text{H}_{70}\text{O}_2^+$  ( $[\text{M}]^+$ ): 654.5370, found 654.5355.

## NMR Spectroscopy

Degassed NMR samples in toluene- $d_8$  (~1 mM) were recorded and irradiated ( $\lambda_{\text{irr}} = 313$  nm or 365 nm, Vilber Lourmat, 6 W) at  $-20$  °C ( $-40$  °C and  $-46$  °C in case of **C8** and **OMe**, respectively). Irradiations were carried out in a cryostat. For the determination of photostationary states (PSS, Tab S1) and to prevent significant thermal relaxation, samples were cooled to  $-20$  °C ( $-46$  °C in case of **OMe**) in an ethanol bath before the respective measurement. Equilibrium constants between stable and metastable states were determined from fully relaxed samples. The respective energy differences ( $\Delta G$ ) were calculated with the Gibbs equation (Tab. S2). Under the conservative assumption that the absolute measurement error for NMR spectroscopy is  $\pm 3\%$ , energy differences of  $\geq |2.0|$  kcal/mol cannot be reliably determined.

**Table S1 | Photostationary states (PSS) for macrocycles C8–22 and reference compound OMe.** PSS were determined by  $^1\text{H}$  NMR spectroscopy in toluene- $d_6$ .

| Compound   | PSS ( $Z_s \rightarrow E_m$ ) | PSS ( $E_s \rightarrow Z_m$ ) |
|------------|-------------------------------|-------------------------------|
| <b>C8</b>  | 50 $\pm$ 2%                   | ---                           |
| <b>C10</b> | 74 $\pm$ 2%                   | ---                           |
| <b>C12</b> | 81 $\pm$ 2%                   | ---                           |
| <b>C14</b> | 81 $\pm$ 2%                   | ---                           |
| <b>C16</b> | 83 $\pm$ 2%                   | 67 $\pm$ 4%                   |
| <b>C18</b> | 80 $\pm$ 2%                   | 65 $\pm$ 4%                   |
| <b>C20</b> | 81 $\pm$ 2%                   | 63 $\pm$ 4%                   |
| <b>C22</b> | 80 $\pm$ 2%                   | 65 $\pm$ 4%                   |
| <b>OMe</b> | 78 $\pm$ 2%                   | 70 $\pm$ 4%                   |

**Table S2 Energy differences between stable and metastable states of macrocycles C8–22 and reference compound OMe.** Energies were determined by  $^1\text{H}$  NMR spectroscopy in toluene- $d_6$  and are reported for 20 °C.

| Compound   | $\Delta G$ ( $E_m \rightarrow Z_s$ ) | $\Delta G$ ( $E_m \rightarrow E_s$ ) | $\Delta G$ ( $Z_m \rightarrow Z_s$ ) |
|------------|--------------------------------------|--------------------------------------|--------------------------------------|
| <b>C8</b>  | $\leq -2.0$ kcal/mol                 | ---                                  | ---                                  |
| <b>C10</b> | $\leq -2.0$ kcal/mol                 | ---                                  | ---                                  |
| <b>C12</b> | $\leq -2.0$ kcal/mol                 | ---                                  | ---                                  |
| <b>C14</b> | $\leq -2.0$ kcal/mol                 | ---                                  | ---                                  |
| <b>C16</b> | ---                                  | +0.9 $\pm$ 1 kcal/mol                | $\leq -2.0$ kcal/mol                 |
| <b>C18</b> | ---                                  | -0.5 $\pm$ 1 kcal/mol                | $\leq -2.0$ kcal/mol                 |
| <b>C20</b> | ---                                  | -1.0 $\pm$ 1 kcal/mol                | $\leq -2.0$ kcal/mol                 |
| <b>C22</b> | ---                                  | -1.4 $\pm$ 1 kcal/mol                | $\leq -2.0$ kcal/mol                 |
| <b>OMe</b> | ---                                  | $\leq -2.0$ kcal/mol                 | $\leq -2.0$ kcal/mol                 |

## Switching behavior of C8

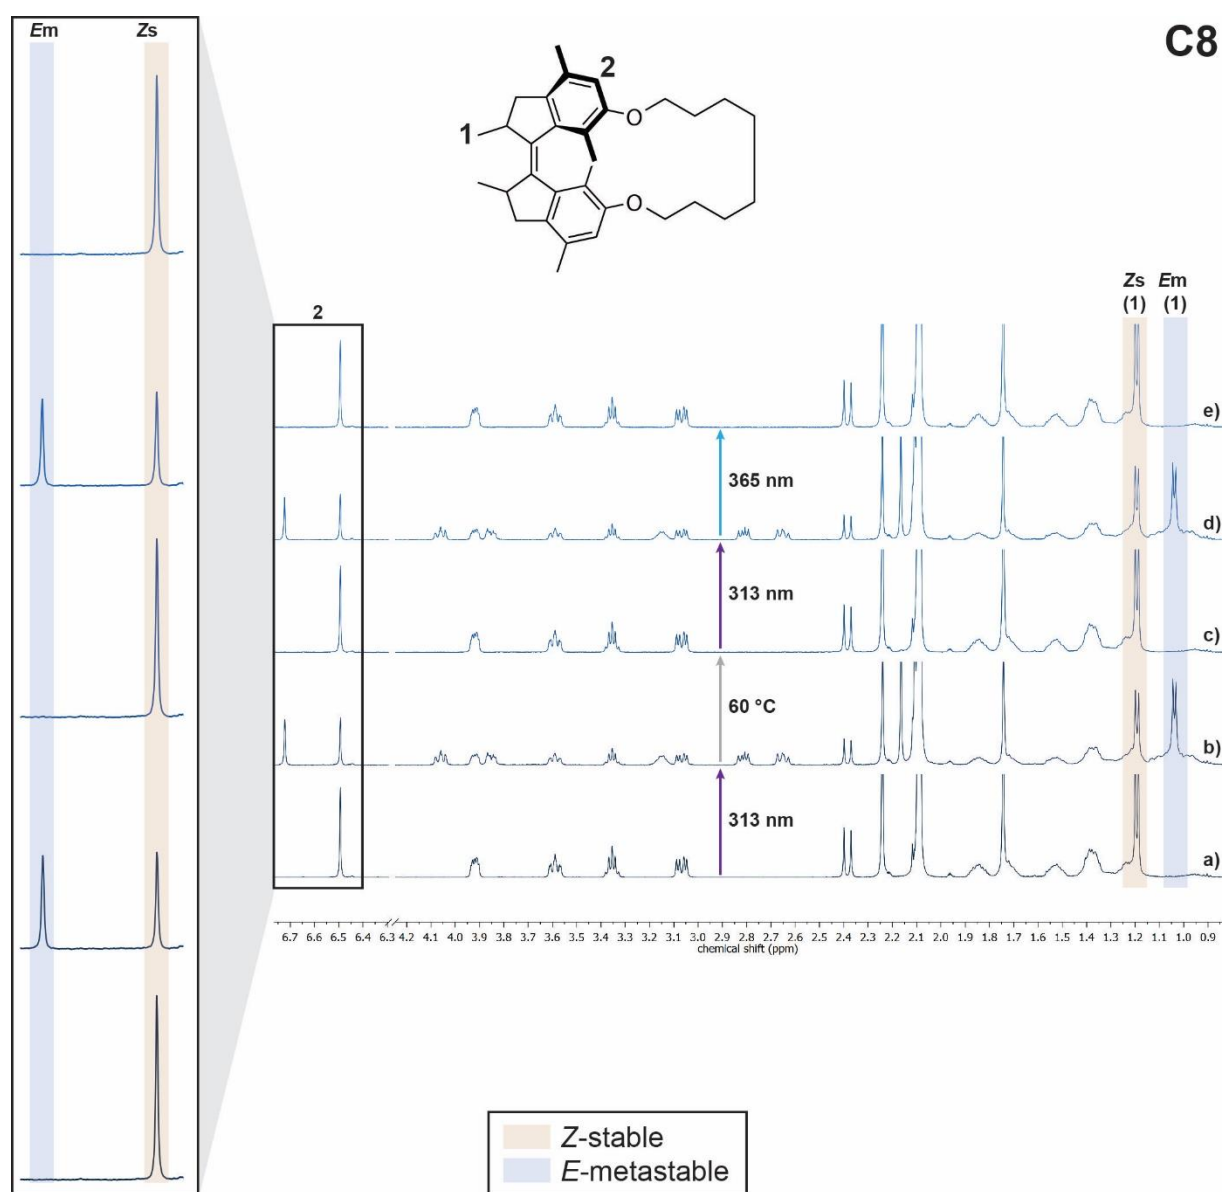

**Fig. S1 | Switching behavior of C8 followed by  $^1\text{H}$  NMR spectroscopy (500 MHz,  $-20\text{ }^\circ\text{C}$ , toluene- $d_6$ ).** a) Non irradiated C8-Z stable sample, b) PSS mixture after irradiation with 313 nm at  $-40\text{ }^\circ\text{C}$ , c) composition after full relaxation at  $60\text{ }^\circ\text{C}$ , d) PSS mixture after irradiation with 313 nm at  $-40\text{ }^\circ\text{C}$ , e) PSS mixture after irradiation with 365 nm at  $-40\text{ }^\circ\text{C}$ .

## Switching behavior of C10

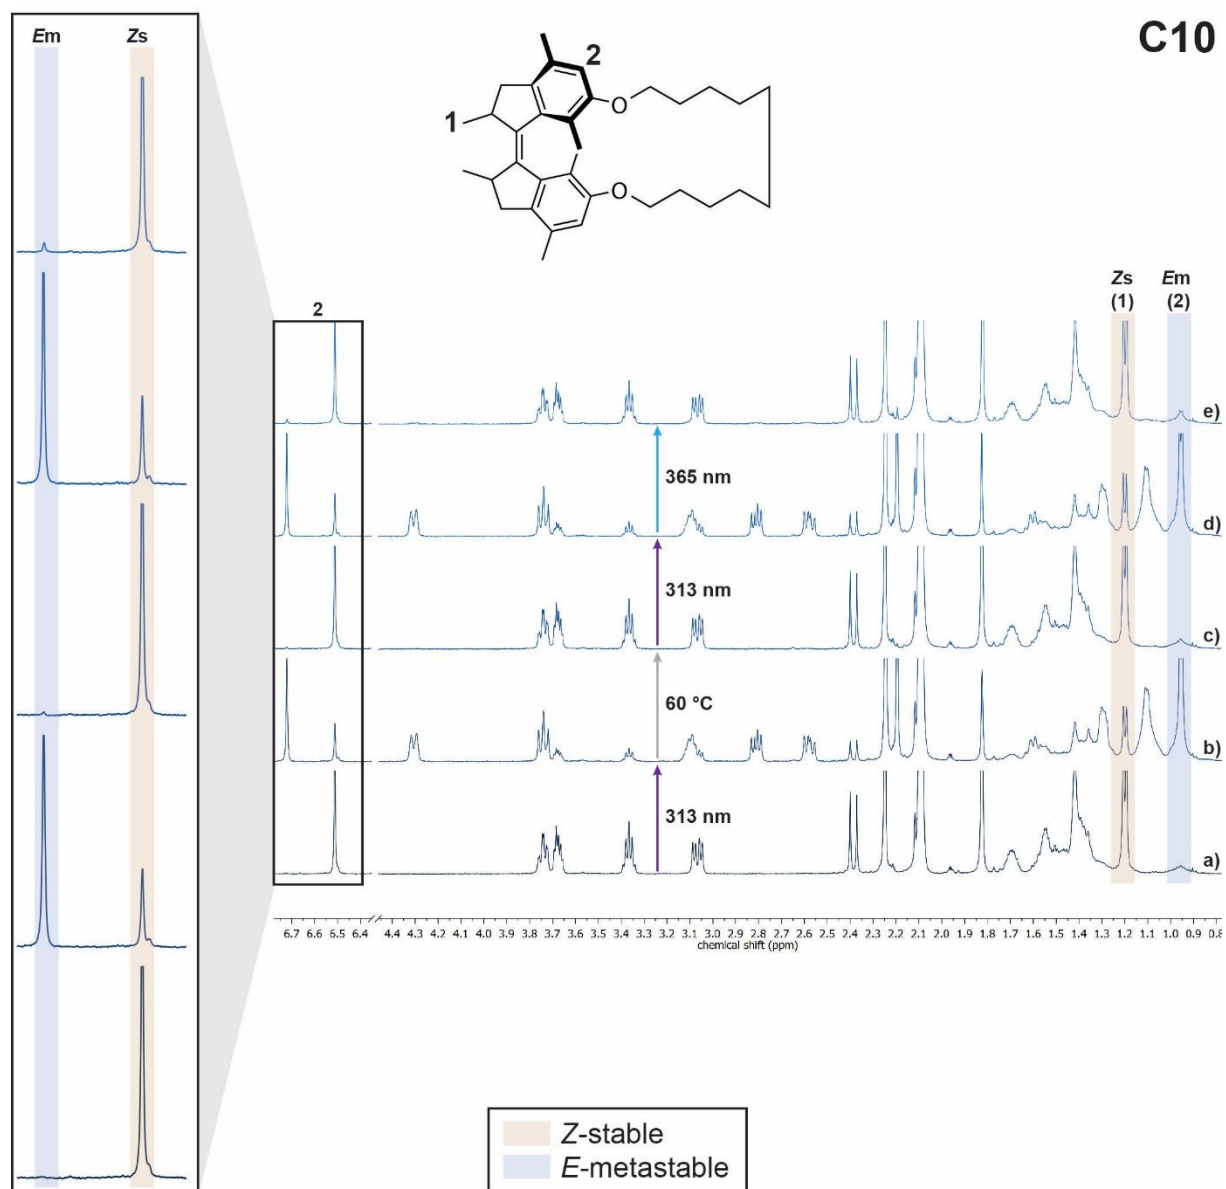

**Fig. S2 | Switching behavior of C10 followed by  $^1\text{H}$  NMR spectroscopy (500 MHz,  $-20\text{ }^\circ\text{C}$ , toluene- $d_6$ ).** a) Non irradiated C10-Z stable sample, b) PSS mixture after irradiation with 313 nm at  $-20\text{ }^\circ\text{C}$ , c) composition after full relaxation at  $60\text{ }^\circ\text{C}$ , d) PSS mixture after irradiation with 313 nm at  $-20\text{ }^\circ\text{C}$ , e) PSS mixture after irradiation with 365 nm at  $-20\text{ }^\circ\text{C}$ .



## Switching behavior of C12

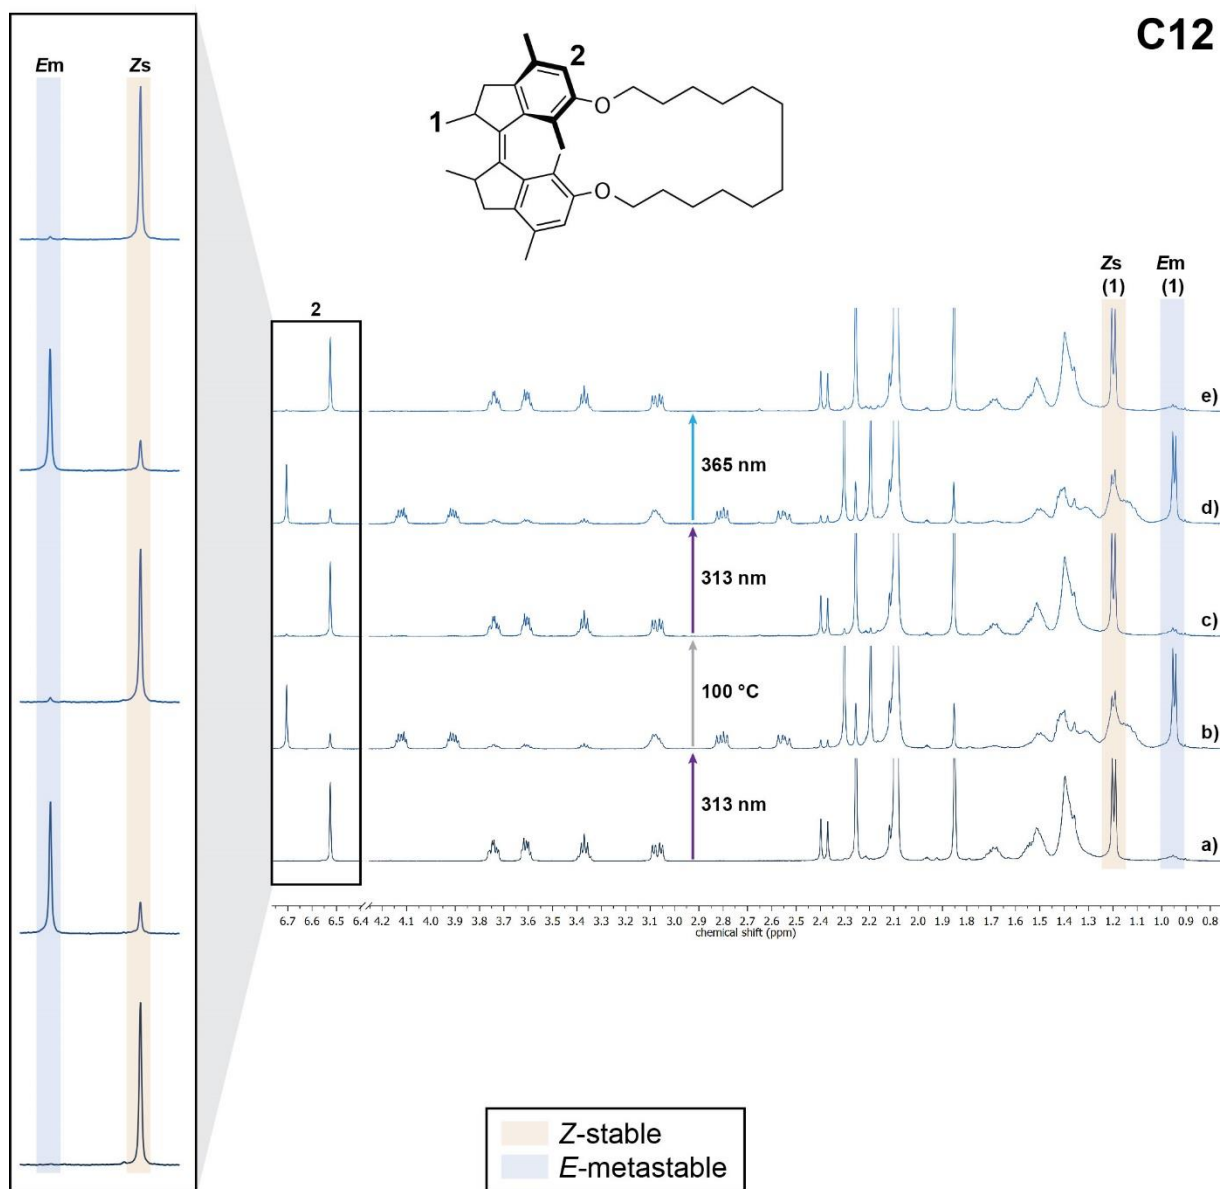

**Fig. S3 | Switching behavior of C12 followed by  $^1\text{H}$  NMR spectroscopy (500 MHz,  $-20\text{ }^\circ\text{C}$ , toluene- $d_6$ ).** a) Non irradiated C12-Z stable sample, b) PSS mixture after irradiation with 313 nm at  $-20\text{ }^\circ\text{C}$ , c) composition after full relaxation at  $100\text{ }^\circ\text{C}$ , d) PSS mixture after irradiation with 313 nm at  $-20\text{ }^\circ\text{C}$ , e) PSS mixture after irradiation with 365 nm at  $-20\text{ }^\circ\text{C}$ .

## Switching behavior of C14

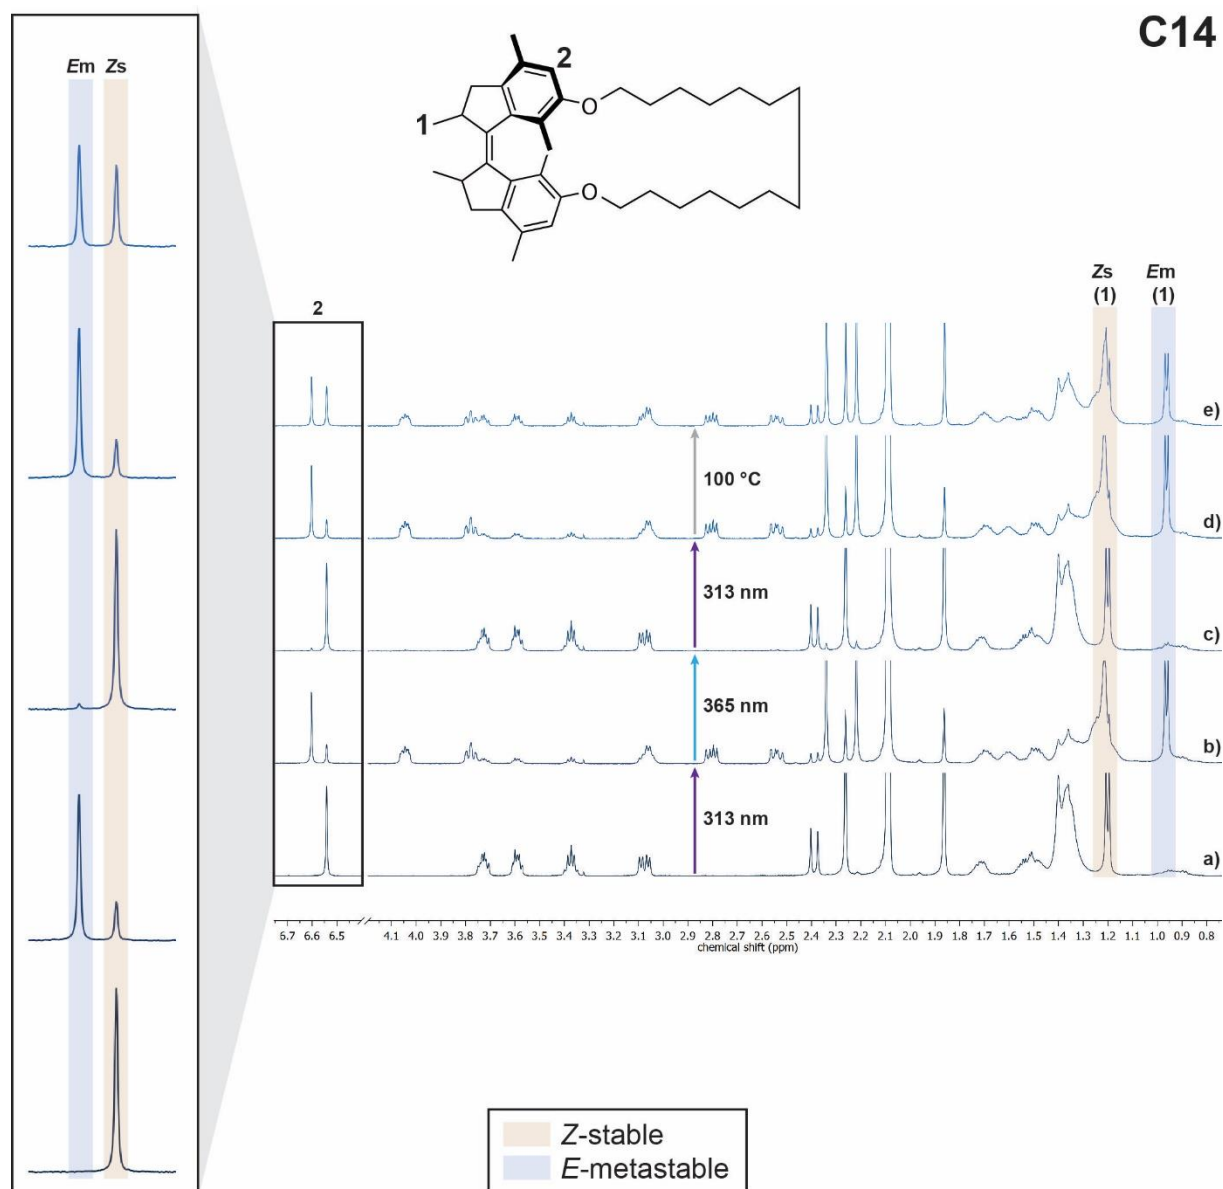

**Fig. S4 | Switching behavior of C14 followed by  $^1\text{H}$  NMR spectroscopy (500 MHz,  $-20\text{ }^\circ\text{C}$ , toluene- $d_8$ ).** a) Non irradiated C14-Z stable sample, b) PSS mixture after irradiation with 313 nm at  $-20\text{ }^\circ\text{C}$ , c) PSS mixture after irradiation with 365 nm at  $-20\text{ }^\circ\text{C}$ , d) PSS mixture after irradiation with 313 nm at  $-20\text{ }^\circ\text{C}$ , e) composition after partial relaxation at  $100\text{ }^\circ\text{C}$  for 3 d.

## Full rotational cycle of C16

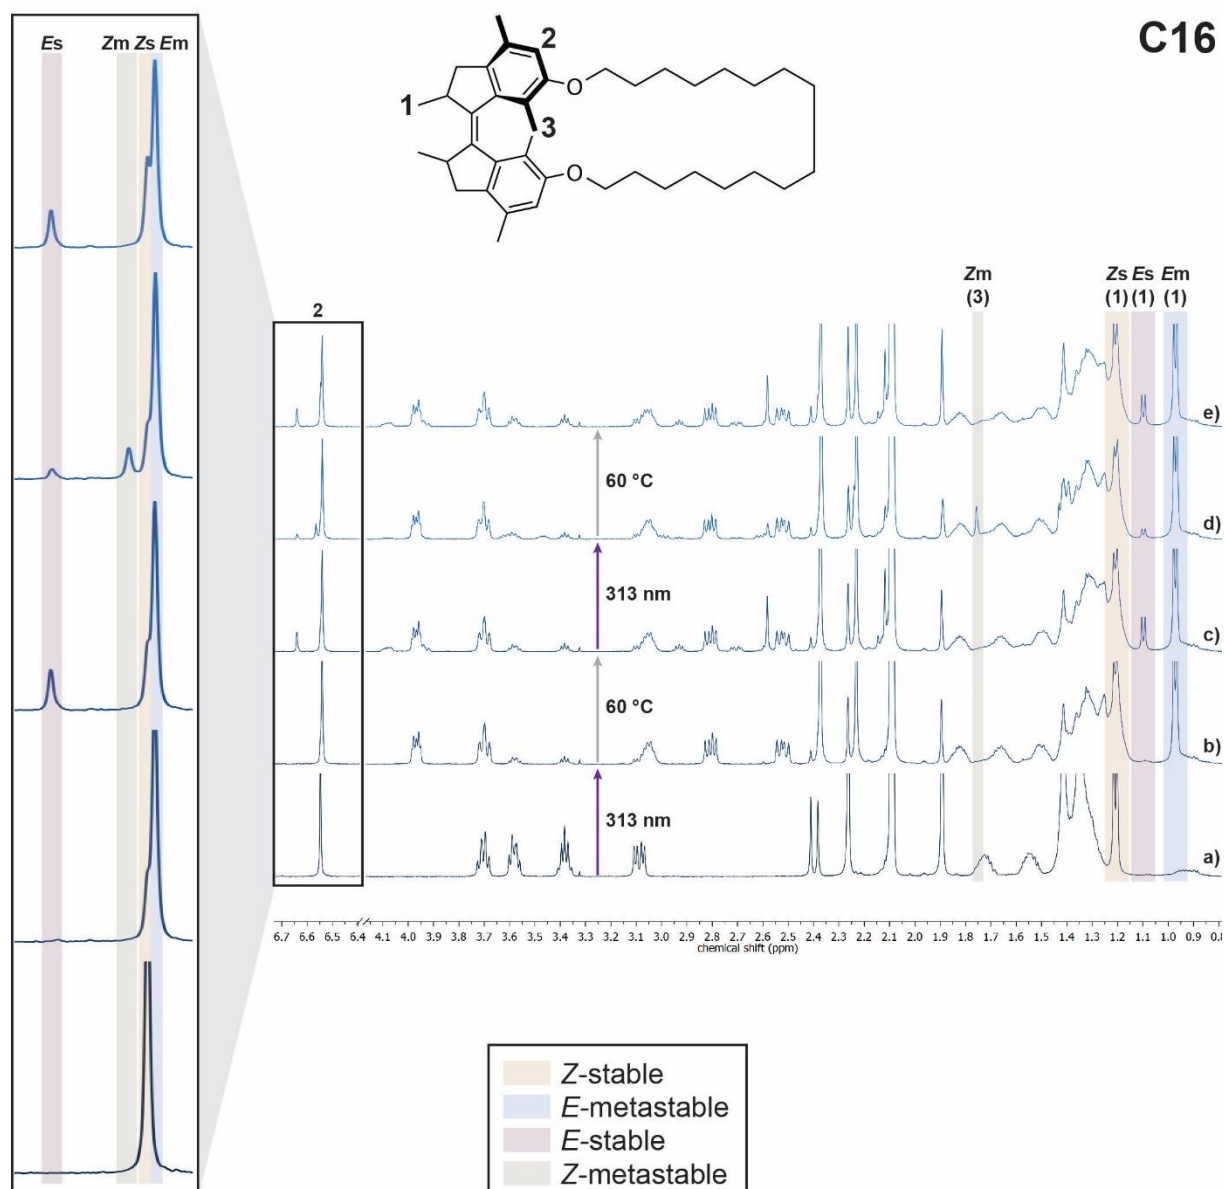

**Fig. S5 | Full rotational cycle of C16 followed by  $^1\text{H}$  NMR spectroscopy (500 MHz,  $-20\text{ }^\circ\text{C}$ , toluene- $d_8$ ).** a) Non irradiated C16-Z stable sample, b) PSS mixture after irradiation with 313 nm at  $-20\text{ }^\circ\text{C}$ , c) composition after full relaxation at  $60\text{ }^\circ\text{C}$ , d) PSS mixture after irradiation with 313 nm at  $-20\text{ }^\circ\text{C}$ , e) composition after full relaxation at  $60\text{ }^\circ\text{C}$ .

## Full rotational cycle of C18

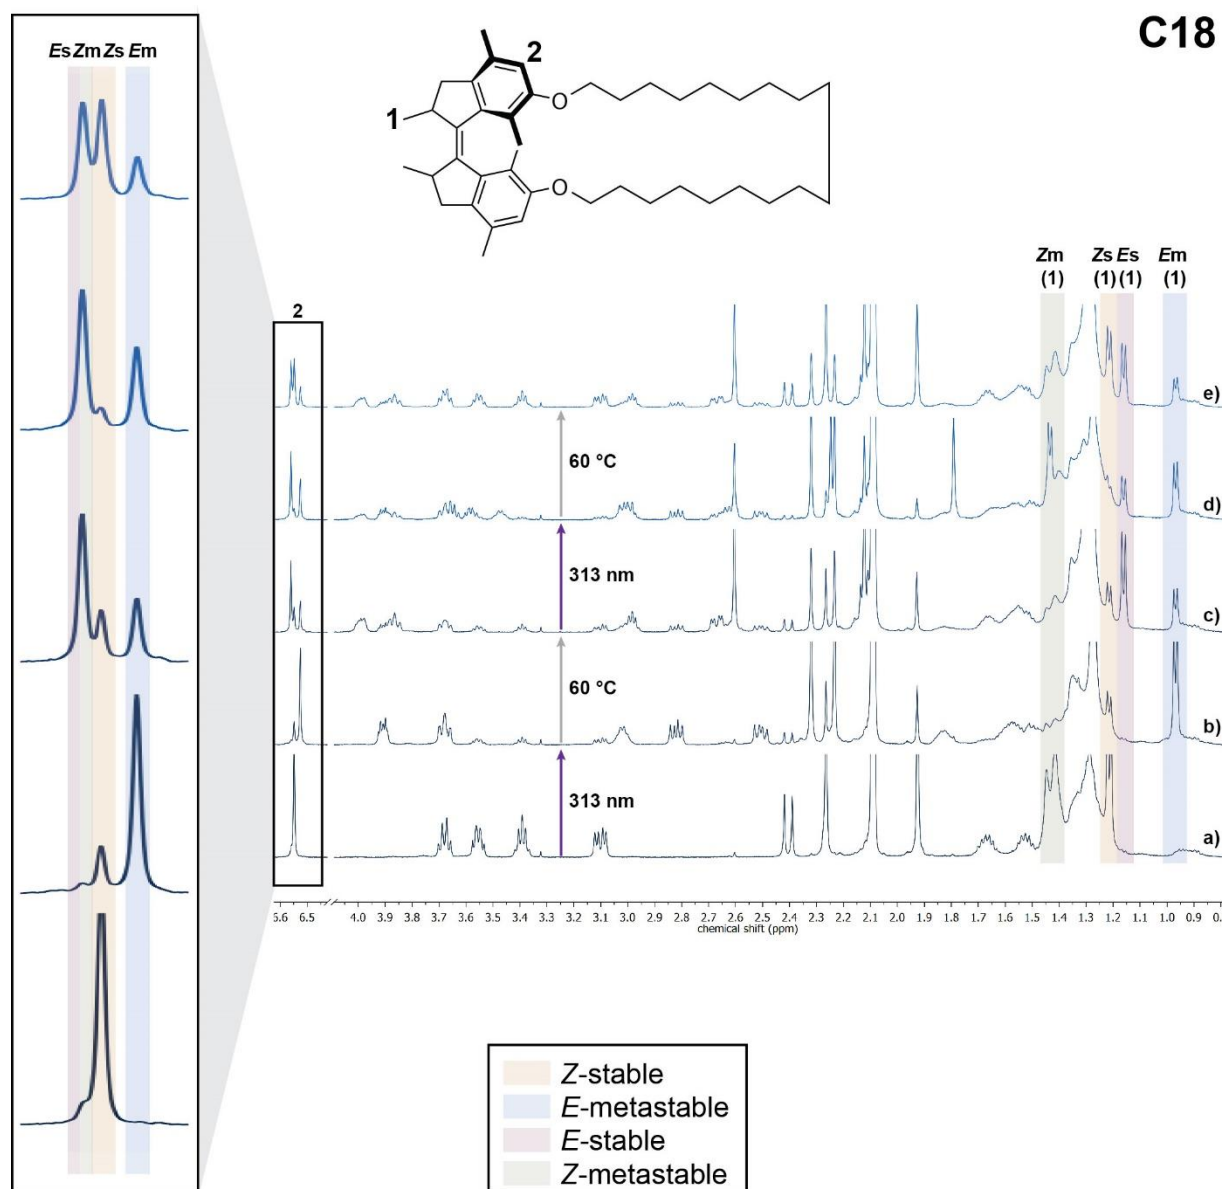

**Fig. S6 | Full rotational cycle of C18 followed by  $^1\text{H}$  NMR spectroscopy (500 MHz,  $-20\text{ }^\circ\text{C}$ , toluene- $d_6$ ).** a) Non irradiated C18-Z stable sample, b) PSS mixture after irradiation with 313 nm at  $-20\text{ }^\circ\text{C}$ , c) composition after full relaxation at  $60\text{ }^\circ\text{C}$ , d) PSS mixture after irradiation with 313 nm at  $-20\text{ }^\circ\text{C}$ , e) composition after full relaxation at  $60\text{ }^\circ\text{C}$ .

## Full rotational cycle of C20

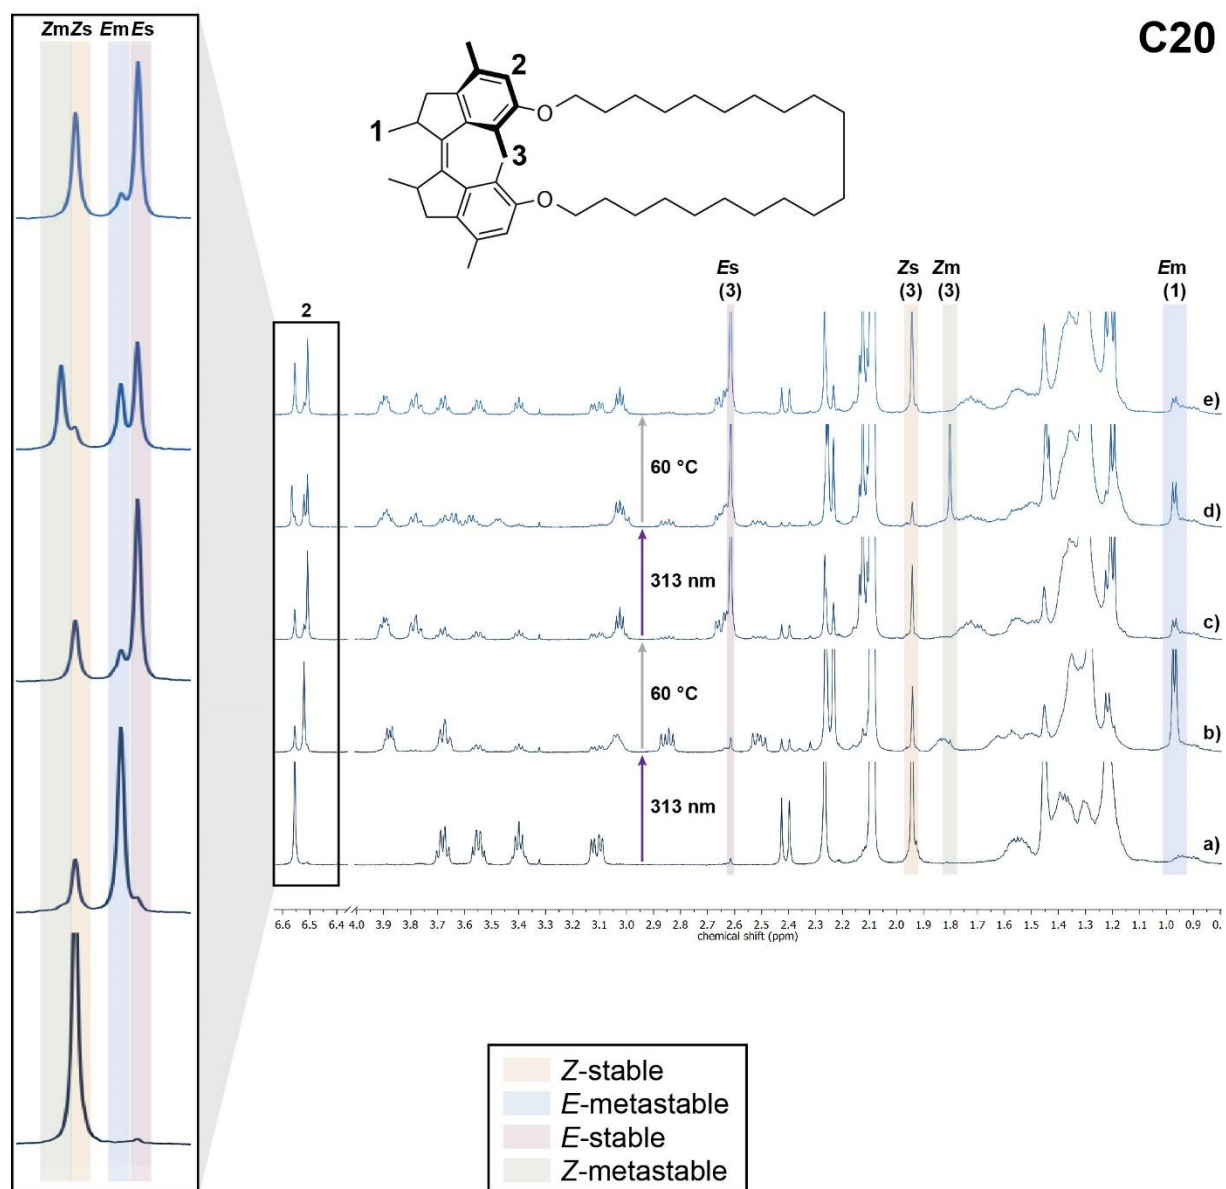

**Fig. S7 | Full rotational cycle of C20 followed by  $^1\text{H}$  NMR spectroscopy (500 MHz,  $-20\text{ }^\circ\text{C}$ , toluene- $d_6$ ).** a) Non irradiated C20-Z stable sample, b) PSS mixture after irradiation with 313 nm at  $-20\text{ }^\circ\text{C}$ , c) composition after full relaxation at  $60\text{ }^\circ\text{C}$ , d) PSS mixture after irradiation with 313 nm at  $-20\text{ }^\circ\text{C}$ , e) composition after full relaxation at  $60\text{ }^\circ\text{C}$ .

## Full rotational cycle of C22

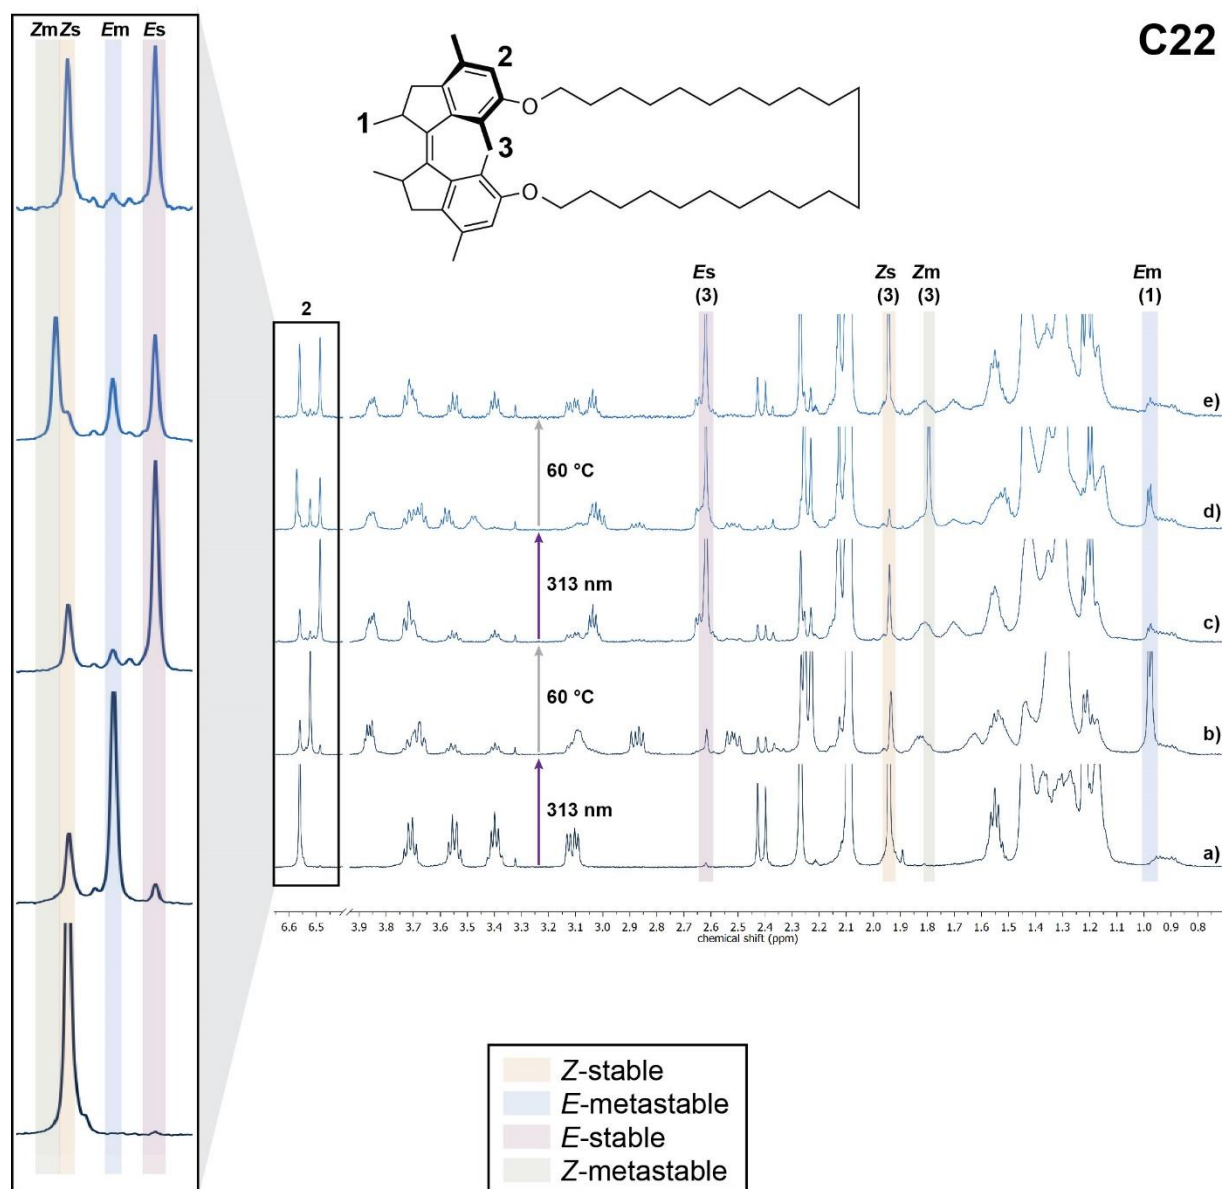

**Fig. S8 | Full rotational cycle of C22 followed by  $^1\text{H}$  NMR spectroscopy (500 MHz,  $-20\text{ }^\circ\text{C}$ , toluene- $d_6$ ).** a) Non irradiated C22-Z stable sample, b) PSS mixture after irradiation with 313 nm at  $-20\text{ }^\circ\text{C}$ , c) composition after full relaxation at  $60\text{ }^\circ\text{C}$ , d) PSS mixture after irradiation with 313 nm at  $-20\text{ }^\circ\text{C}$ , e) composition after full relaxation at  $60\text{ }^\circ\text{C}$ .

## Full rotational cycle of OMe

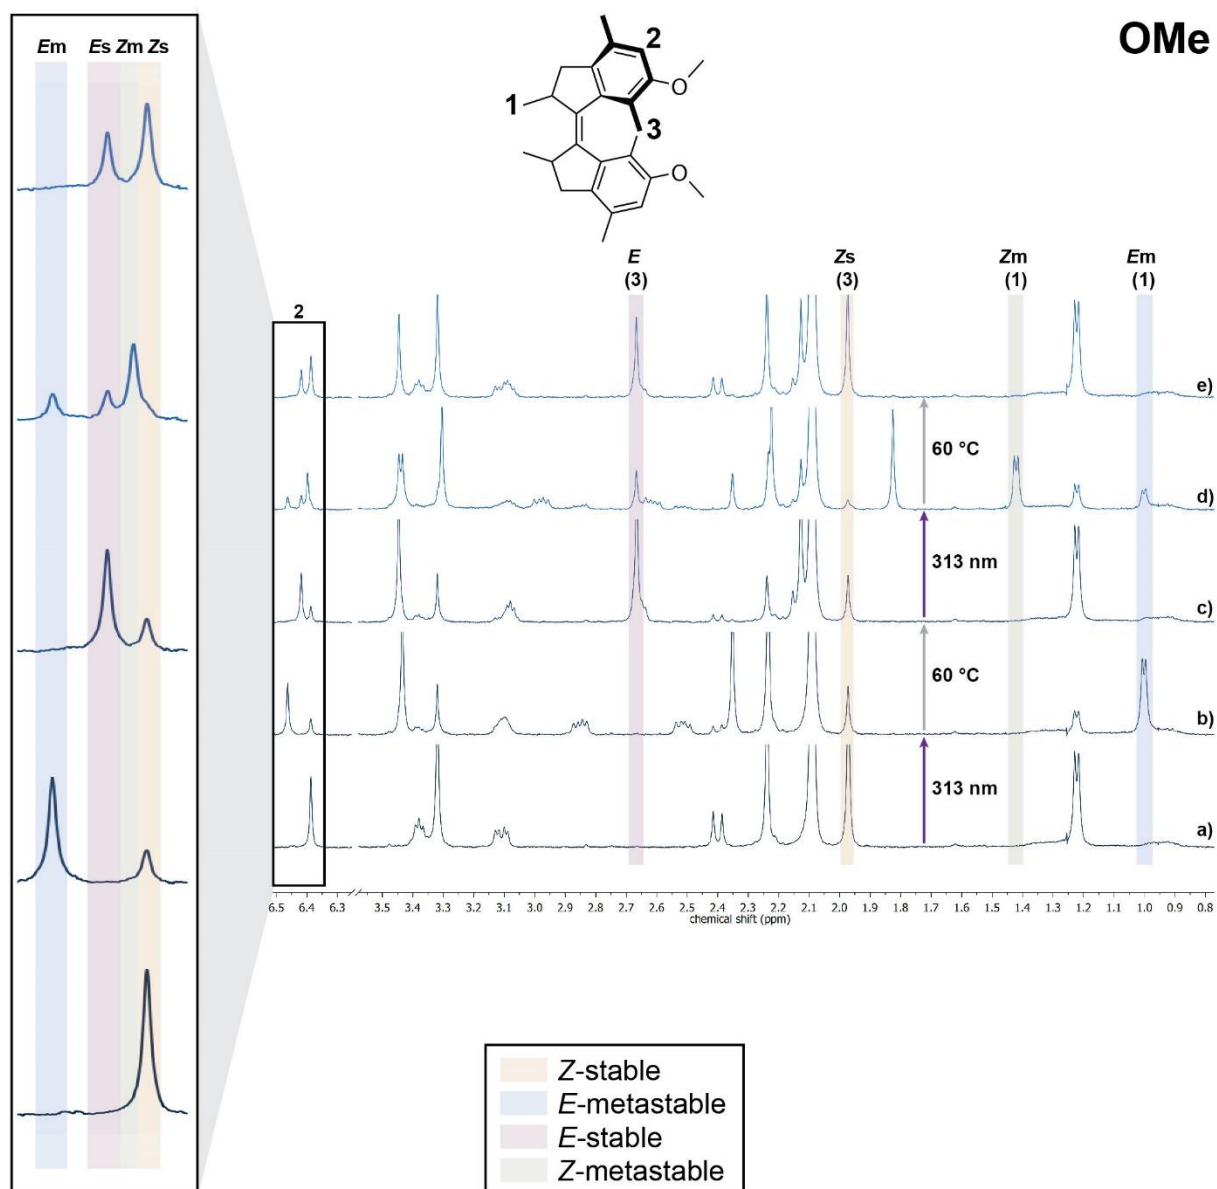

**Fig. S9 | Full rotational cycle of OMe followed by  $^1\text{H}$  NMR spectroscopy (500 MHz,  $-46\text{ }^\circ\text{C}$ ,  $\text{toluene-}d_6$ ).** a) Non irradiated **OMe-Z** stable sample, b) PSS mixture after irradiation with 313 nm at  $-50\text{ }^\circ\text{C}$ , c) composition after full relaxation at  $60\text{ }^\circ\text{C}$ , d) PSS mixture after irradiation with 313 nm at  $-50\text{ }^\circ\text{C}$ , e) composition after full relaxation at  $60\text{ }^\circ\text{C}$ .

## Eyring Analysis

Degassed UV/vis samples in octane (~20  $\mu\text{M}$ ) were measured and irradiated ( $\lambda_{\text{irr}} = 300 \text{ nm}$  THORLABS, LED M300F2) to PSS at  $-15 \text{ }^\circ\text{C}$  ( $-20 \text{ }^\circ\text{C}$  in case of **OMe**). After switching off the LED, the samples were heated to the desired temperature and the THI was followed by plotting the decay of the absorbance at 355 nm against time to extract the respective rate constants. In order to determine the activation energy  $\Delta G^\ddagger$ , a least square analysis was performed on the Eyring equation (Tab. S3).

Since the activation energies for both THIs of **C16** are similar in energy,  $^1\text{H}$  NMR spectroscopy was used to determine the rate constants for the THI from *Z* metastable  $\rightarrow$  *Z* stable. A degassed NMR sample in toluene- $d_8$  (~1 mM) was irradiated ( $\lambda_{\text{irr}} = 313 \text{ nm}$ , Vilber Lourmat, 6W) to PSS at  $-20 \text{ }^\circ\text{C}$ . After switching off the light source, the sample was heated to the desired temperature and the THI was followed by plotting the decay of the integrals at 1.64 ppm against time to extract the respective rate constants.

**Table S3 | Activation energies for thermal helix inversions and double bond isomerizations of macrocycles C8–22 and reference compound OMe.** If not otherwise stated, energies were determined by UV/vis spectroscopy in octane and are reported for  $20 \text{ }^\circ\text{C}$ .  $\Delta G^\ddagger$  and  $\Delta H^\ddagger$  are given in kcal/mol;  $\Delta S^\ddagger$  is given in cal/(K  $\cdot$  mol).

| Compound   | $\Delta G^\ddagger$ ( <i>Em</i> $\rightarrow$ <i>Zs</i> )<br>[ $\Delta H^\ddagger$ , $\Delta S^\ddagger$ , $t_{1/2}$ ] | $\Delta G^\ddagger$ ( <i>Em</i> $\rightarrow$ <i>Es</i> )<br>[ $\Delta H^\ddagger$ , $\Delta S^\ddagger$ , $t_{1/2}$ ] | $\Delta G^\ddagger$ ( <i>Zm</i> $\rightarrow$ <i>Zs</i> )<br>[ $\Delta H^\ddagger$ , $\Delta S^\ddagger$ , $t_{1/2}$ ] |
|------------|------------------------------------------------------------------------------------------------------------------------|------------------------------------------------------------------------------------------------------------------------|------------------------------------------------------------------------------------------------------------------------|
| <b>C8</b>  | 18.8 $\pm$ 0.2<br>[18.2, -2.16, 12 s]                                                                                  | ---                                                                                                                    | ---                                                                                                                    |
| <b>C10</b> | 25.3 $\pm$ 0.1<br>[26.3, 3.56, 9.4 d]                                                                                  | ---                                                                                                                    | ---                                                                                                                    |
| <b>C12</b> | 29.0 $\pm$ 0.1 <sup>a</sup><br>[29.8, 2.22, 49 min]                                                                    | ---                                                                                                                    | ---                                                                                                                    |
| <b>C14</b> | $\geq 32^{\text{a,b}}$<br>[38 h]                                                                                       | ---                                                                                                                    | ---                                                                                                                    |
| <b>C16</b> | ---                                                                                                                    | 22.1 $\pm$ 0.1<br>[14.1, -27.5, 58 min]                                                                                | 23.6 $\pm$ 0.2 <sup>c</sup><br>[19.9, -12.5, 13 h]                                                                     |
| <b>C18</b> | ---                                                                                                                    | 20.4 $\pm$ 0.1<br>[18.1, -7.70, 3.0 min]                                                                               | 23.7 $\pm$ 0.1<br>[19.9, -12.8, 14 h]                                                                                  |
| <b>C20</b> | ---                                                                                                                    | 20.3 $\pm$ 0.1<br>[17.3, -9.95, 2.4 min]                                                                               | 23.7 $\pm$ 0.1<br>[19.3, -15.0, 14 h]                                                                                  |
| <b>C22</b> | ---                                                                                                                    | 20.1 $\pm$ 0.1<br>[18.6, -4.99, 1.7 min]                                                                               | 23.7 $\pm$ 0.1<br>[19.5, -14.4, 15 h]                                                                                  |
| <b>OMe</b> | ---                                                                                                                    | 18.6 $\pm$ 0.3<br>[15.7, -9.99, 11 s]                                                                                  | 23.4 $\pm$ 0.2<br>[19.5, -13.3, 9.0 h]                                                                                 |

(a) energy given at  $110 \text{ }^\circ\text{C}$ ; (b) energy estimated from a single relaxation at  $110 \text{ }^\circ\text{C}$ ; (c) energy determined by  $^1\text{H}$  NMR spectroscopy in toluene- $d_8$



### Thermal double bond isomerization from C8-E metastable to C8-Z stable

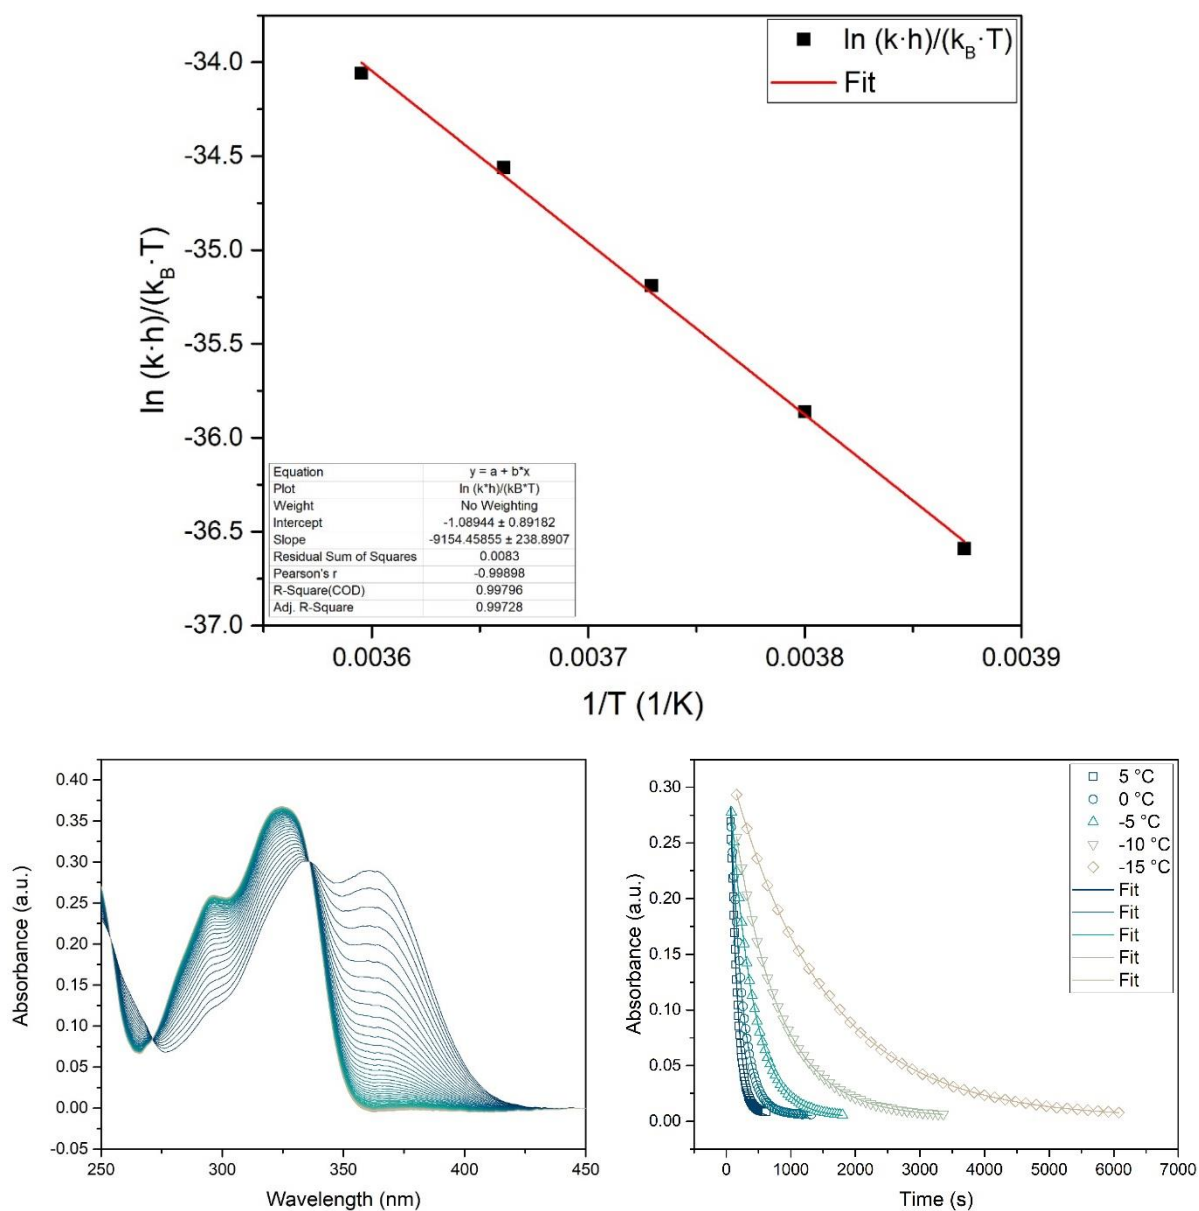

**Fig. S10 | Eyring analysis of thermal double bond isomerization from C8-E metastable to C8-Z stable.** Rate constants were determined by UV/vis spectroscopy in octane ( $\sim 20 \mu\text{M}$ ) at  $-15$ ,  $-10$ ,  $-5$ ,  $0$  and  $5$  °C. Eyring plot (top), representative example for thermal isomerization followed by UV/vis spectroscopy at  $0$  °C (bottom left) and decay curves (bottom right). Start: blue spectrum, end: brown spectrum.

## Thermal double bond isomerization from C10-E metastable to C10-Z stable

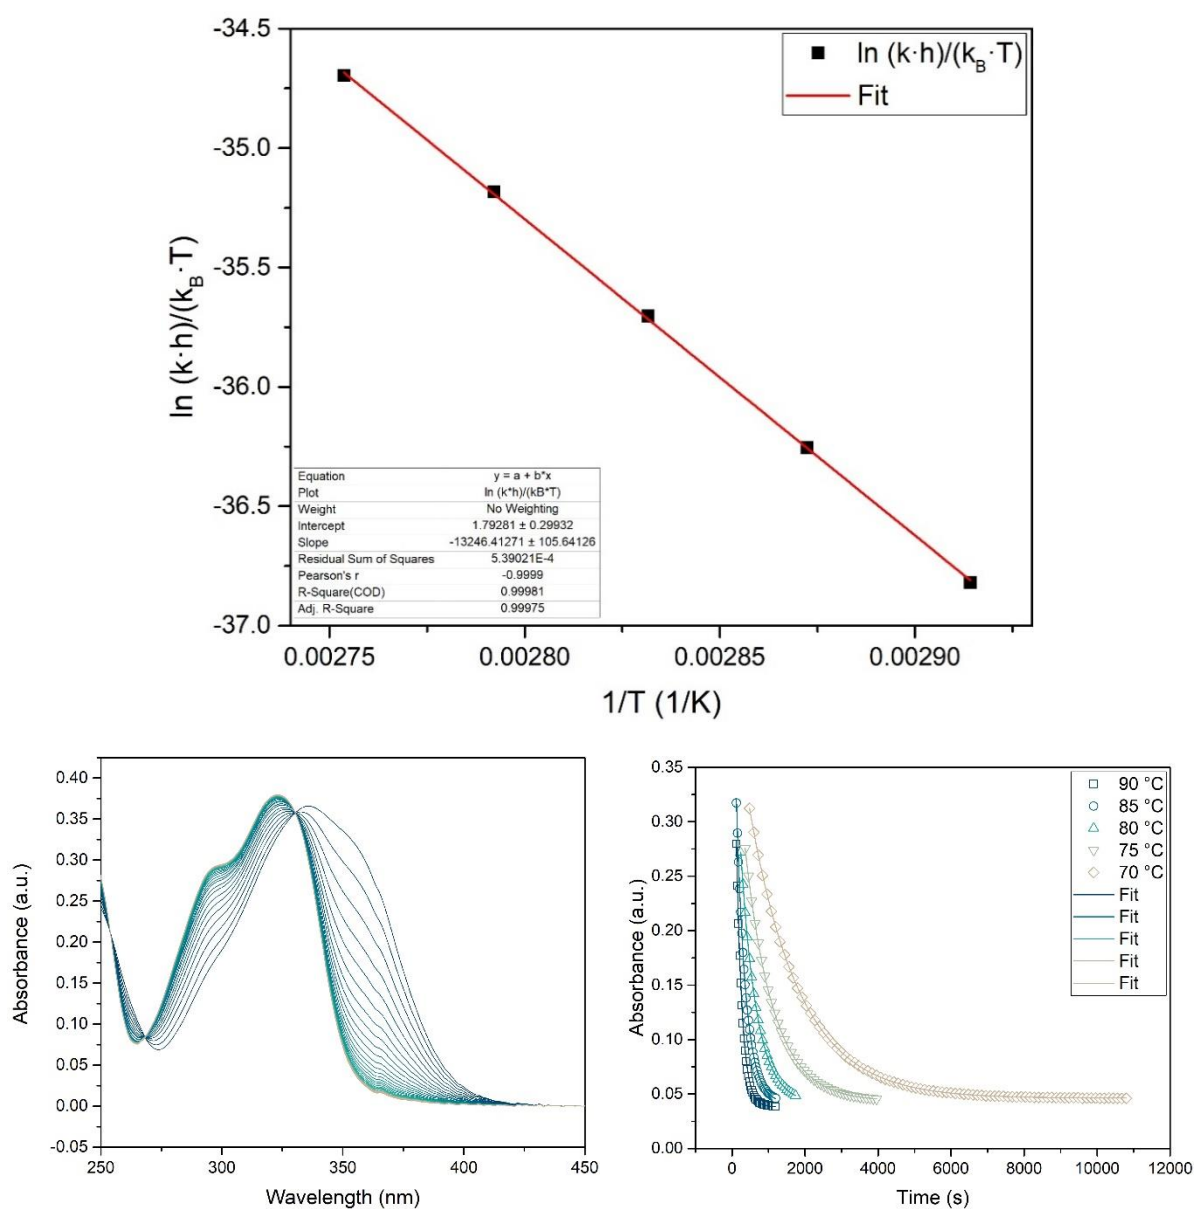

**Fig. S11 | Eyring analysis of thermal double bond isomerization from C10-E metastable to C10-Z stable.** Rate constants were determined by UV/vis spectroscopy in octane ( $\sim 20 \mu\text{M}$ ) at 70, 75, 80, 85 and 90 °C. Eyring plot (top), representative example for thermal isomerization followed by UV/vis spectroscopy at 90 °C (bottom left) and decay curves (bottom right). Start: blue spectrum, end: brown spectrum.

### Thermal double bond isomerization from C12-E metastable to C12-Z stable

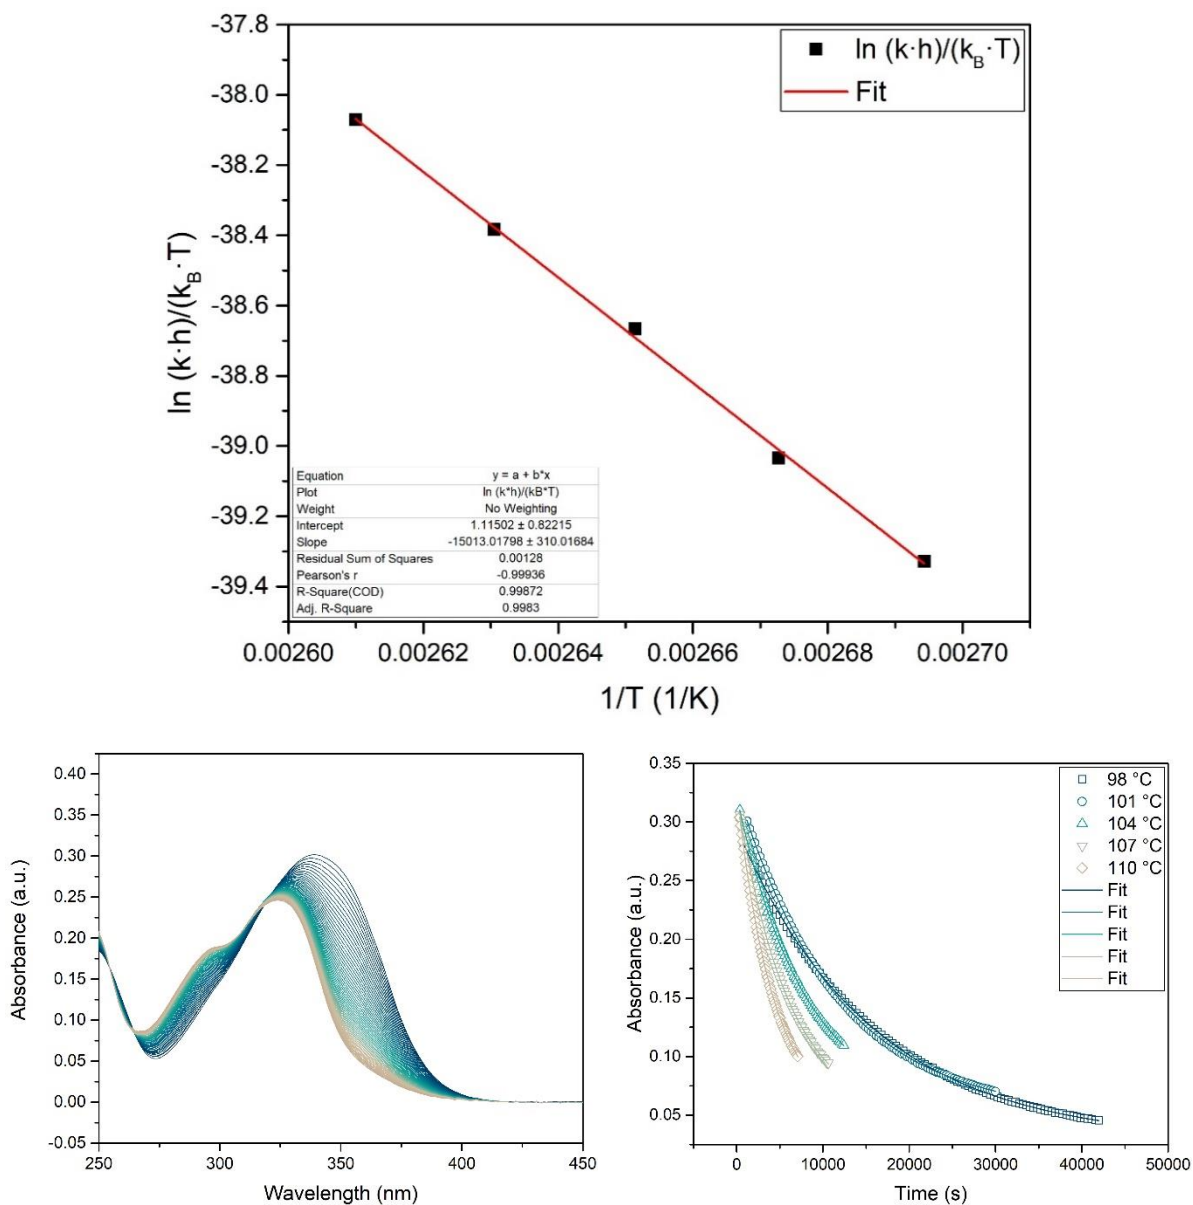

**Fig. S12 | Eyring analysis of thermal double bond isomerization from C12-E metastable to C12-Z stable.** Rate constants were determined by UV/vis spectroscopy in octane (~20  $\mu$ M) at 98, 101, 104, 107 and 110 °C. Eyring plot (top), representative example for thermal isomerization followed by UV/vis spectroscopy at 101 °C (bottom left) and decay curves (bottom right). Start: blue spectrum, end: brown spectrum.

### Thermal double bond isomerization from C14-E metastable to C14-Z stable

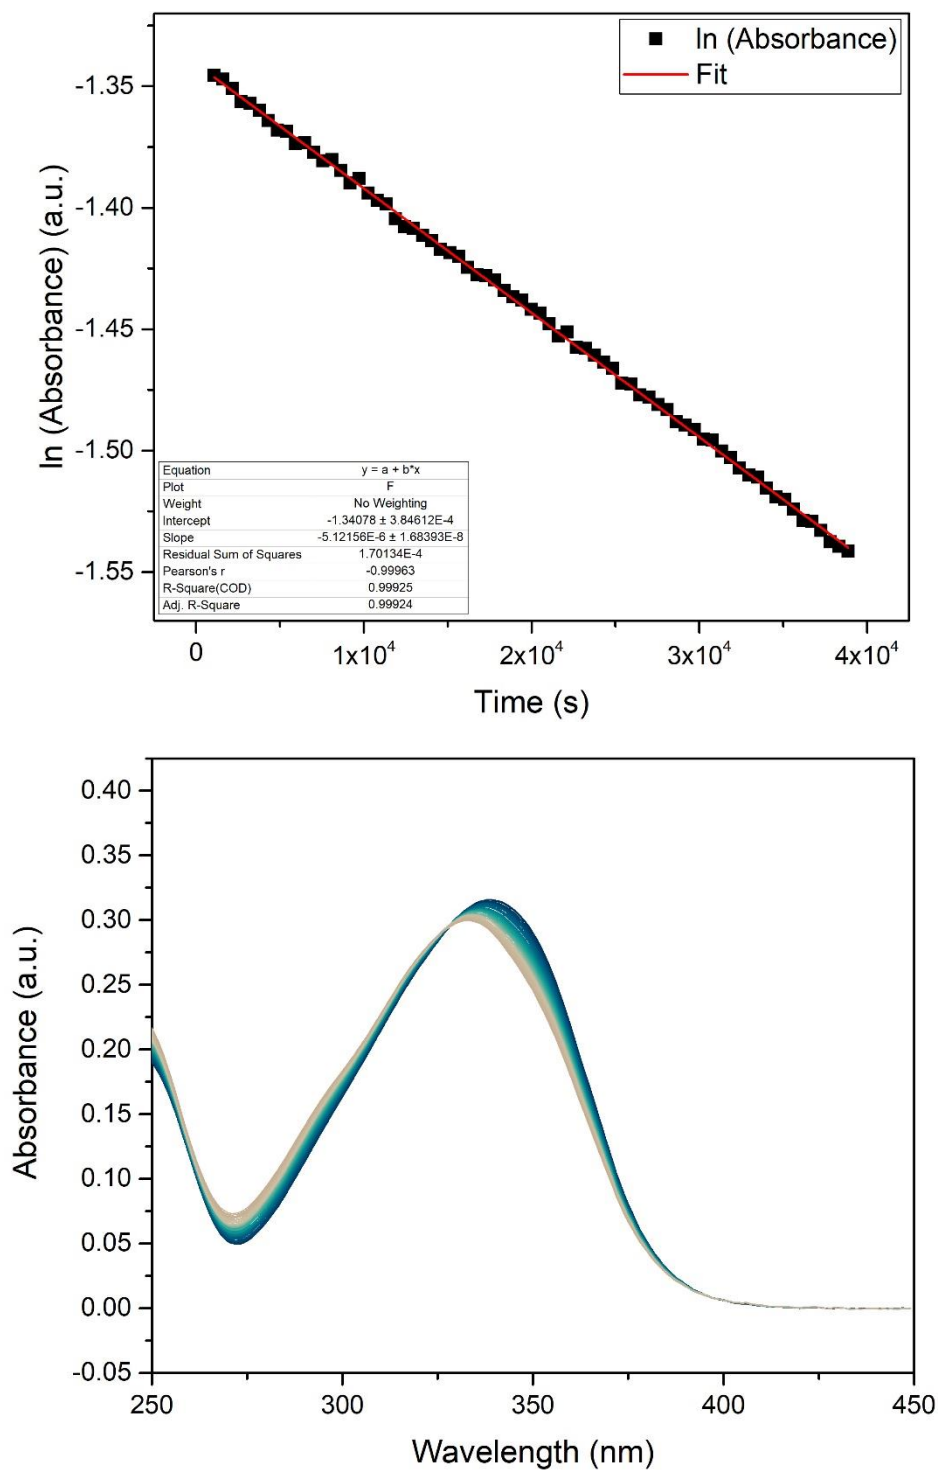

**Fig. S13 | Half-life of thermal double bond isomerization from C14-E metastable to C14-Z stable.** Rate constant was determined by UV/vis spectroscopy in octane ( $\sim 20 \mu\text{M}$ ) at  $110^\circ\text{C}$ . Linear fit (top) and thermal isomerization followed by UV/vis spectroscopy at  $110^\circ\text{C}$  (bottom). Start: blue spectrum, end: brown spectrum.

### Thermal helix inversion from C16-E metastable to C16-E stable

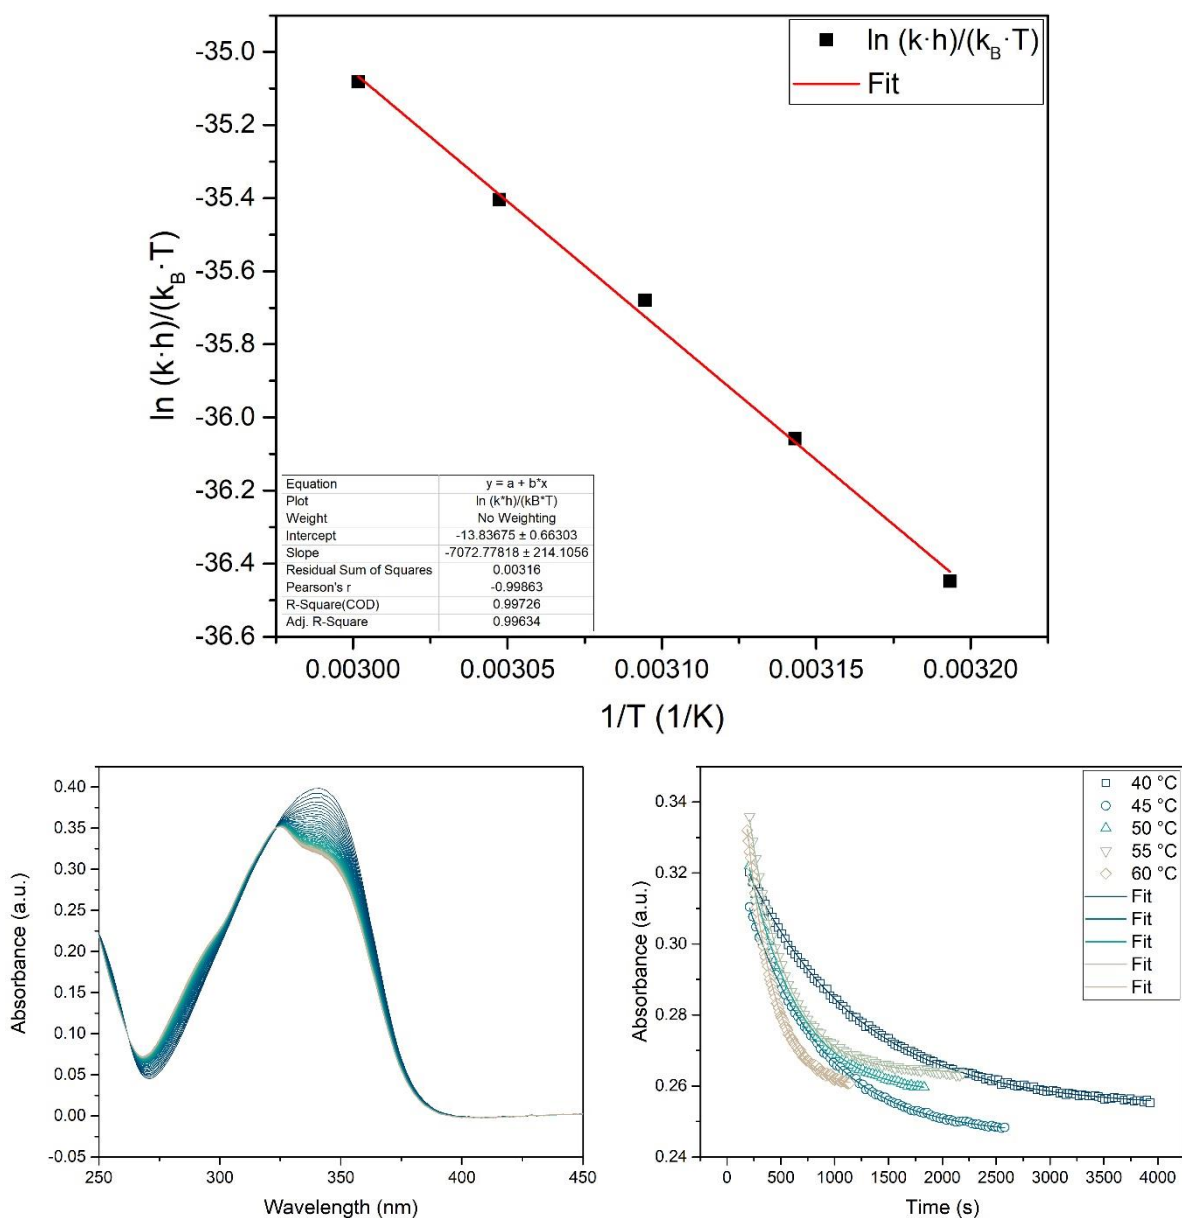

**Fig. S14 | Eyring analysis of thermal helix inversion from C16-E metastable to C16-E stable.** Rate constants were determined by UV/vis spectroscopy in octane ( $\sim 20 \mu\text{M}$ ) at 40, 45, 50, 55 and 60 °C. Eyring plot (top), representative example for thermal isomerization followed by UV/vis spectroscopy at 50 °C (bottom left) and decay curves (bottom right). Start: blue spectrum, end: brown spectrum.

### Thermal helix inversion from C16-Z metastable to C16-Z stable

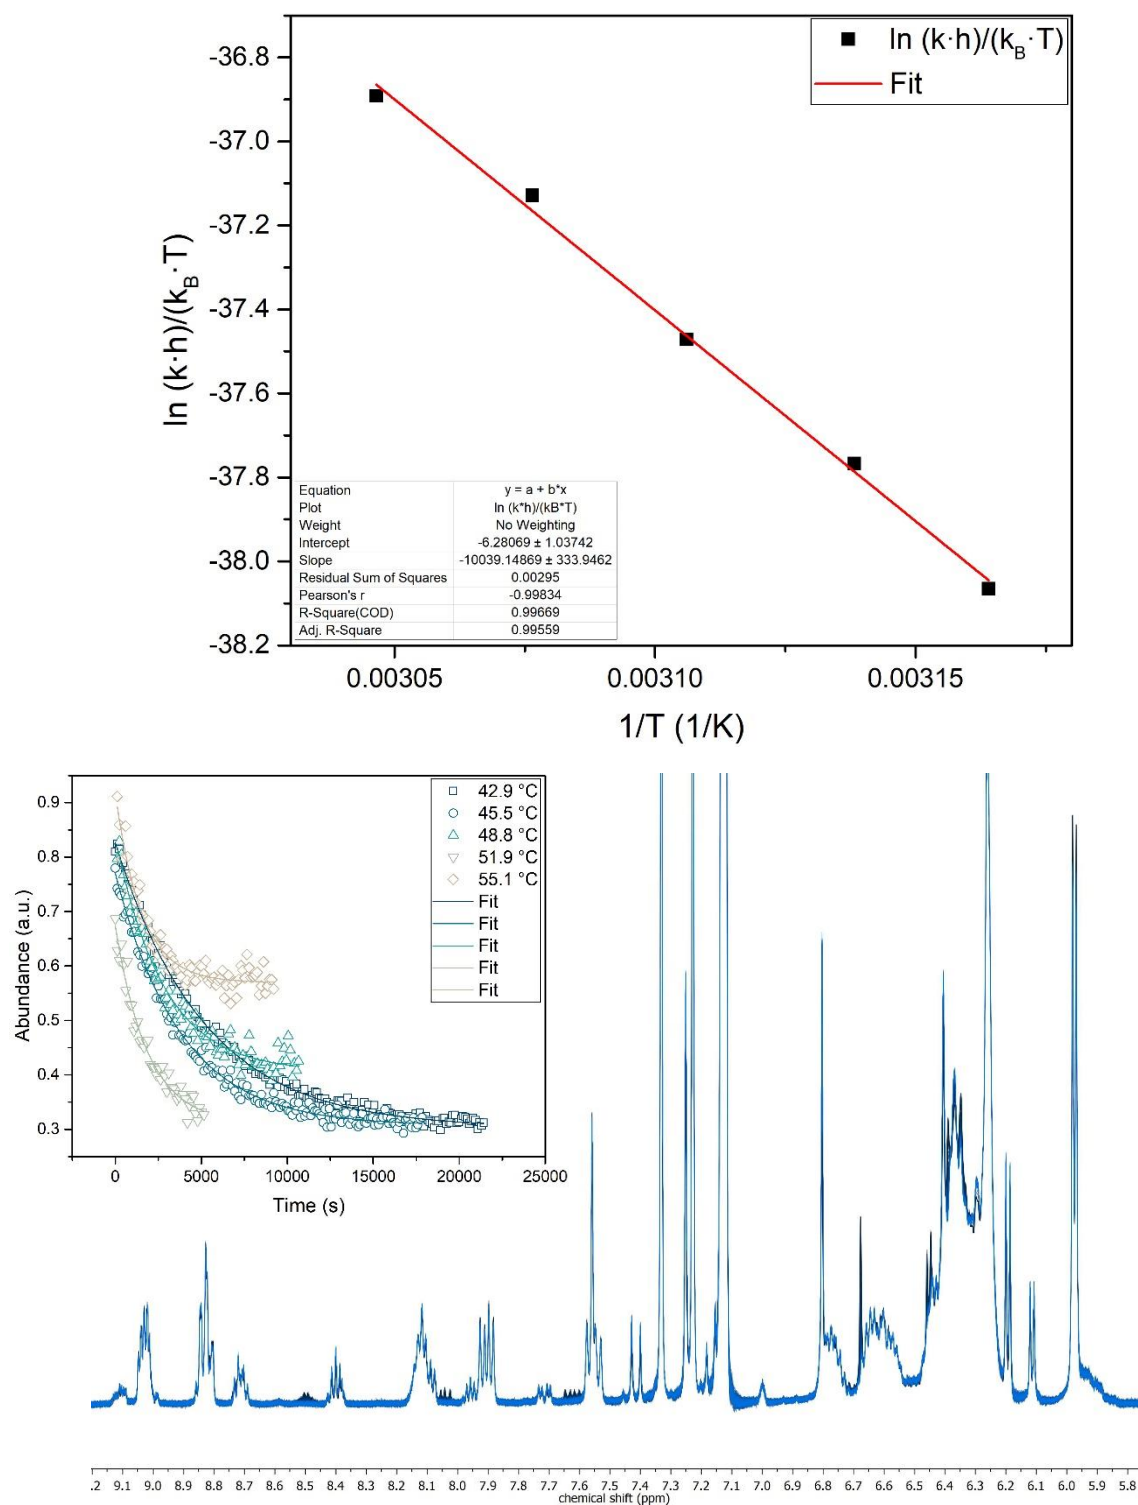

**Fig. S15 | Eyring analysis of thermal helix inversion from C16-Z metastable to C16-Z stable.** Rate constants were determined by  $^1\text{H}$  NMR spectroscopy in toluene- $d_8$  (~1 mM) at 42.9, 45.5, 48.8, 51.9 and 55.1 °C. Eyring plot (top), representative example for thermal isomerization followed by  $^1\text{H}$  NMR spectroscopy at 42.9 °C (bottom) and decay curves (inset). Start: black spectrum, end: blue spectrum.

### Thermal helix inversion from C18-E metastable to C18-E stable

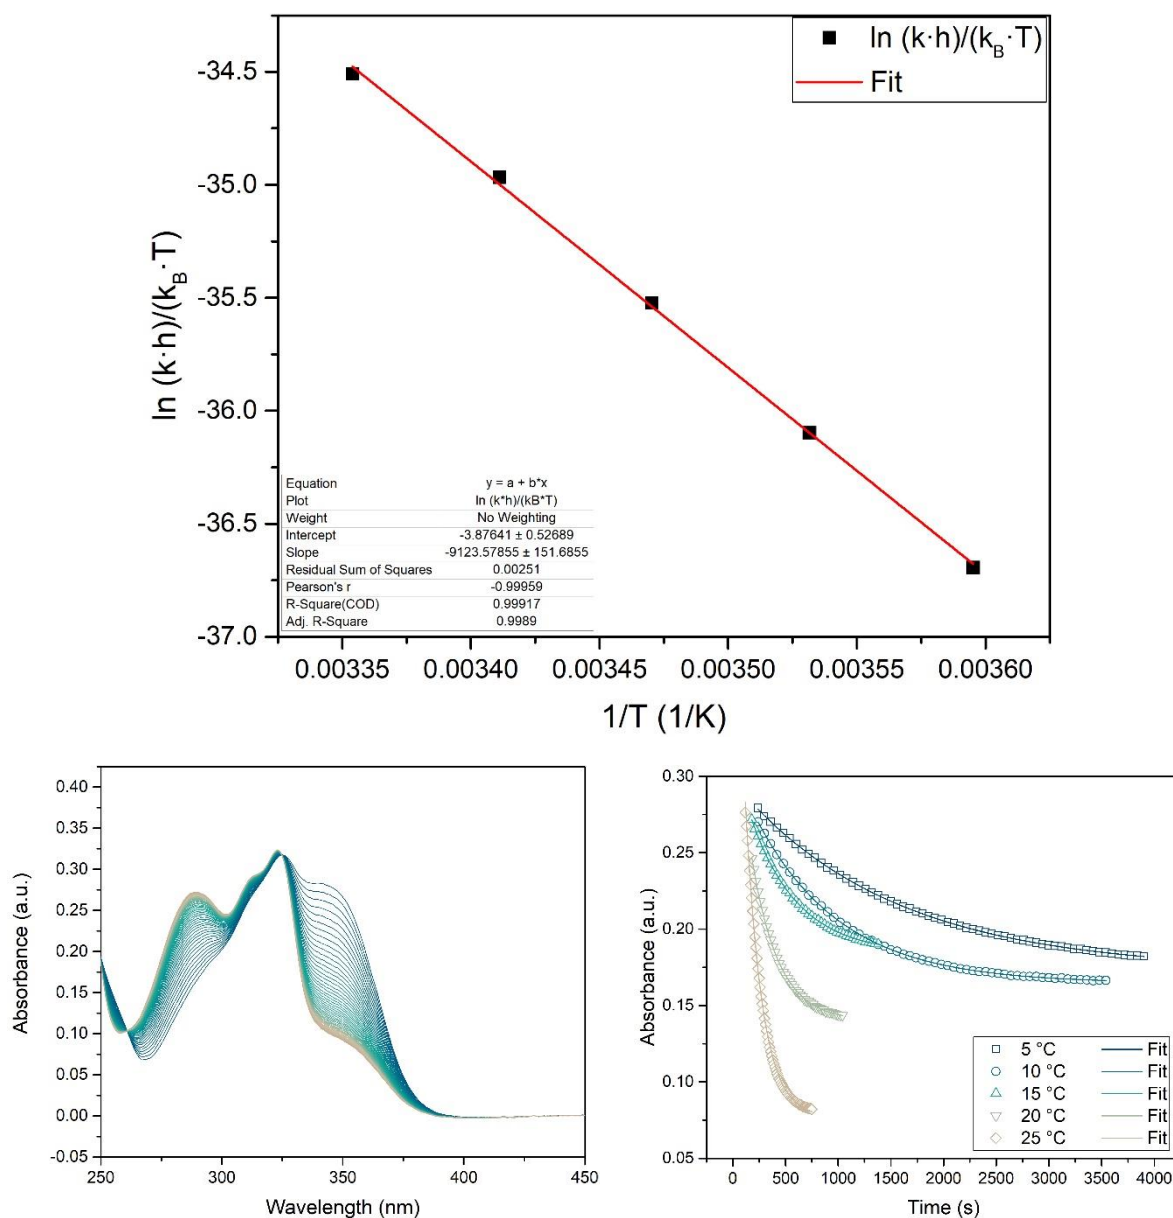

**Fig. S16 | Eyring analysis of thermal helix inversion from C16-E metastable to C18-E stable.** Rate constants were determined by UV/vis spectroscopy in octane (~20  $\mu$ M) at 5, 10, 15, 20 and 25 °C. Eyring plot (top), representative example for thermal isomerization followed by UV/vis spectroscopy at 25 °C (bottom left) and decay curves (bottom right). Start: blue spectrum, end: brown spectrum.

### Thermal helix inversion from C18-Z metastable to C18-Z stable

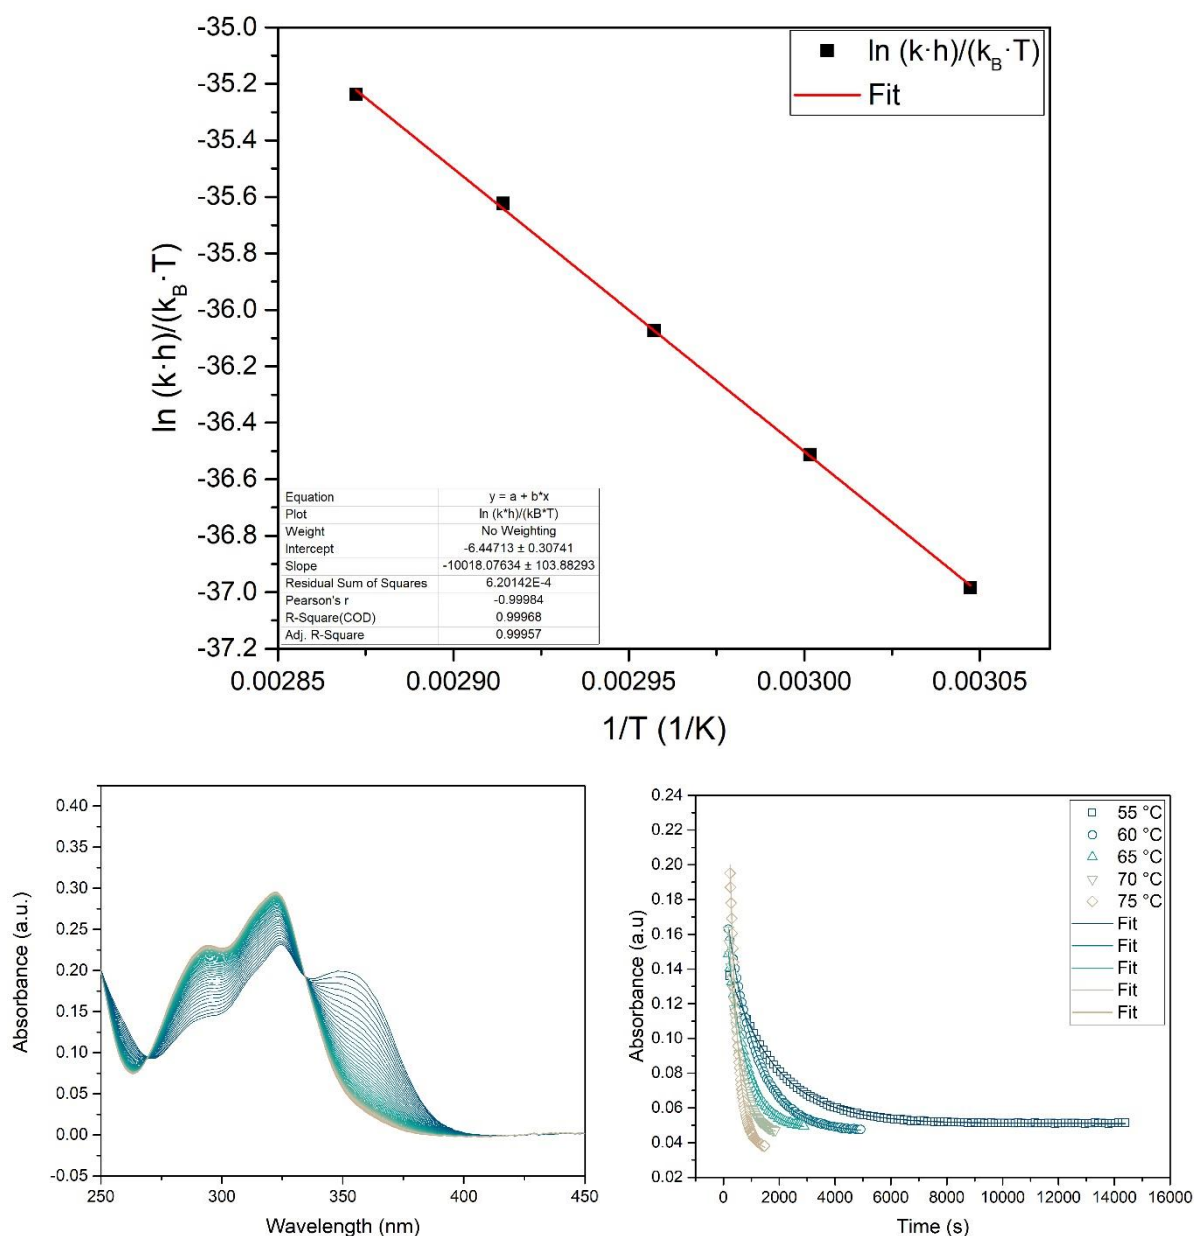

**Fig. S17 | Eyring analysis of thermal helix inversion from C18-Z metastable to C18-Z stable.** Rate constants were determined by UV/vis spectroscopy in octane ( $\sim 20 \mu\text{M}$ ) at 55, 60, 65, 70 and 75 °C. Eyring plot (top), representative example for thermal isomerization followed by UV/vis spectroscopy at 75 °C (bottom left) and decay curves (bottom right). Start: blue spectrum, end: brown spectrum.



### Thermal helix inversion from C20-E metastable to C20-E stable

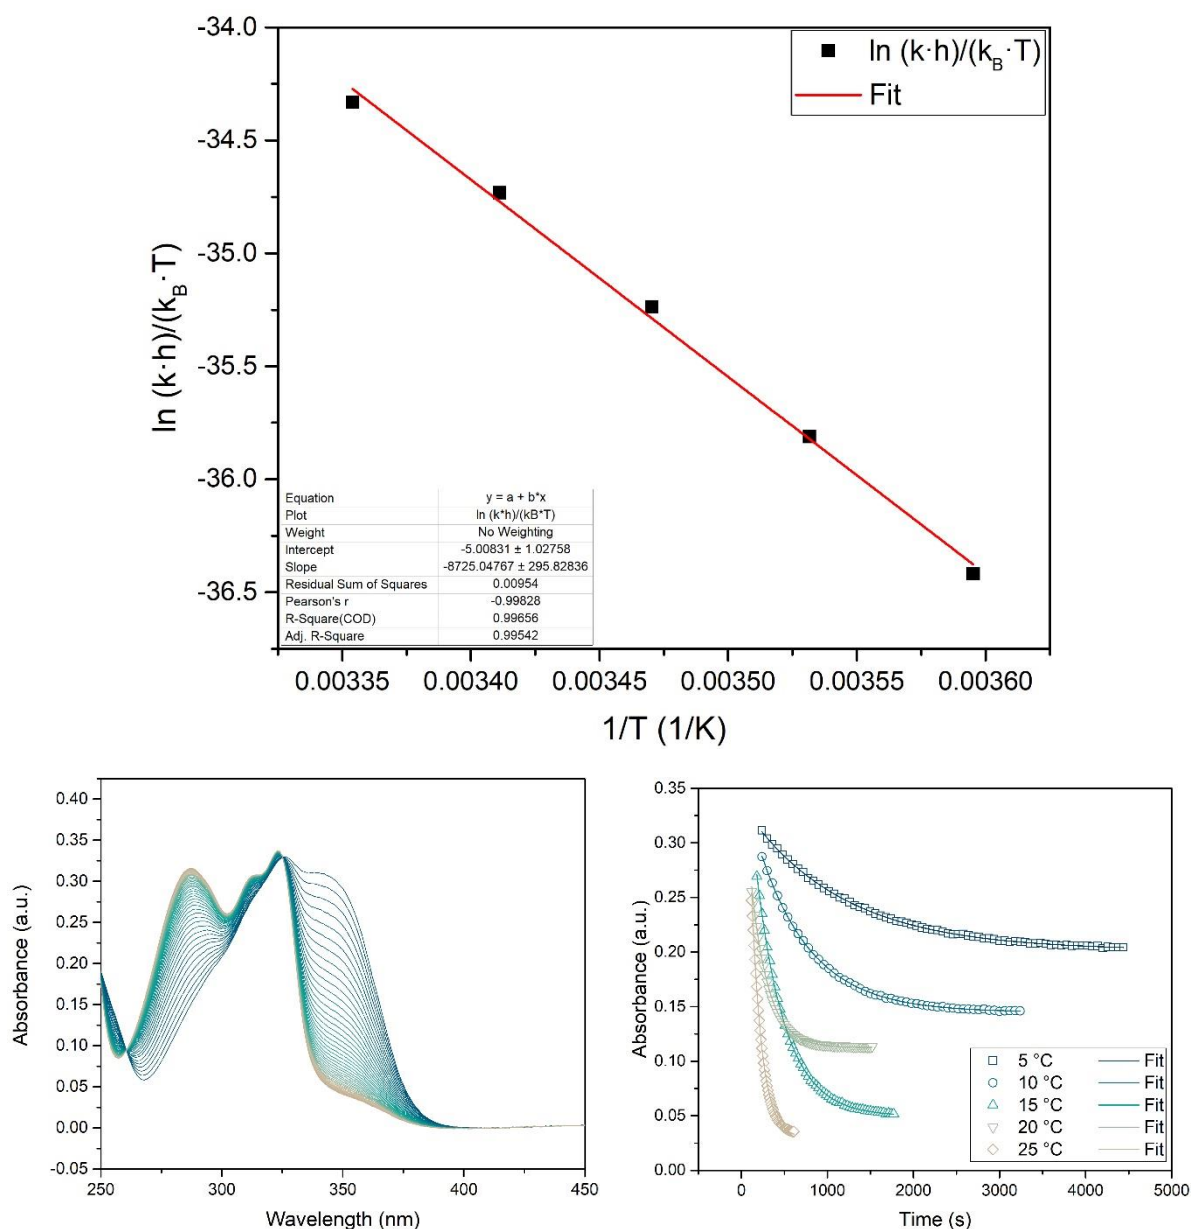

**Fig. S18 | Eyring analysis of thermal helix inversion from C20-E metastable to C20-E stable.** Rate constants were determined by UV/vis spectroscopy in octane ( $\sim 20 \mu\text{M}$ ) at 5, 10, 15, 20 and 25 °C. Eyring plot (top), representative example for thermal isomerization followed by UV/vis spectroscopy at 25 °C (bottom left) and decay curves (bottom right). Start: blue spectrum, end: brown spectrum.

### Thermal helix inversion from C20-Z metastable to C20-Z stable

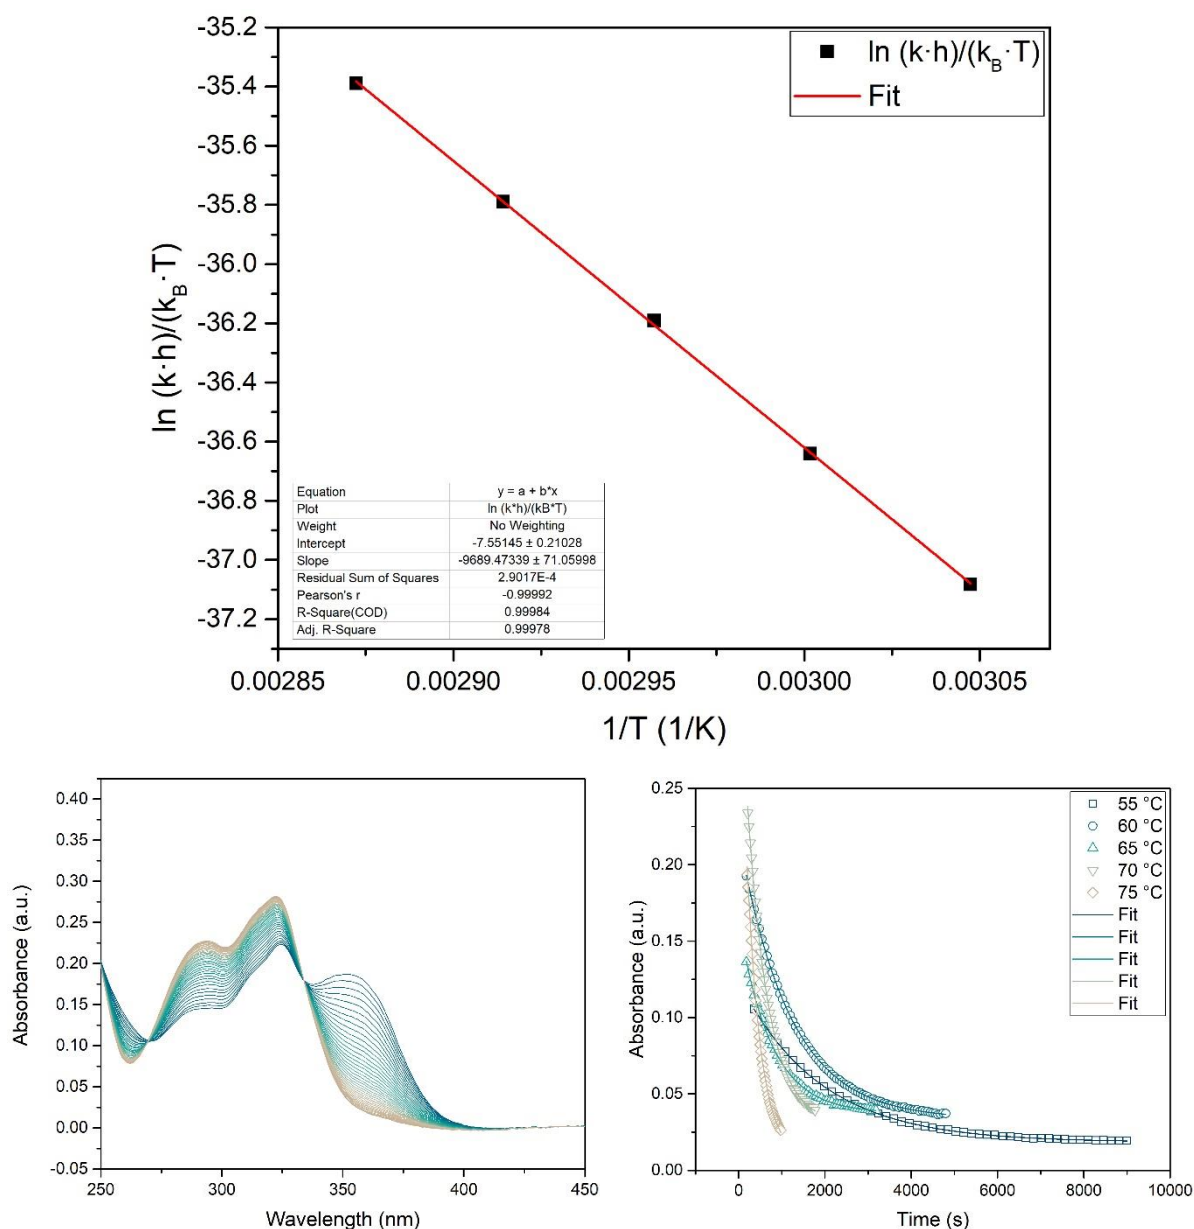

**Fig. S19 | Eyring analysis of thermal helix inversion from C20-Z metastable to C20-Z stable.** Rate constants were determined by UV/vis spectroscopy in octane (~20  $\mu$ M) at 55, 60, 65, 70 and 75 °C. Eyring plot (top), representative example for thermal isomerization followed by UV/vis spectroscopy at 75 °C (bottom left) and decay curves (bottom right). Start: blue spectrum, end: brown spectrum.

### Thermal helix inversion from C22-E metastable to C22-E stable

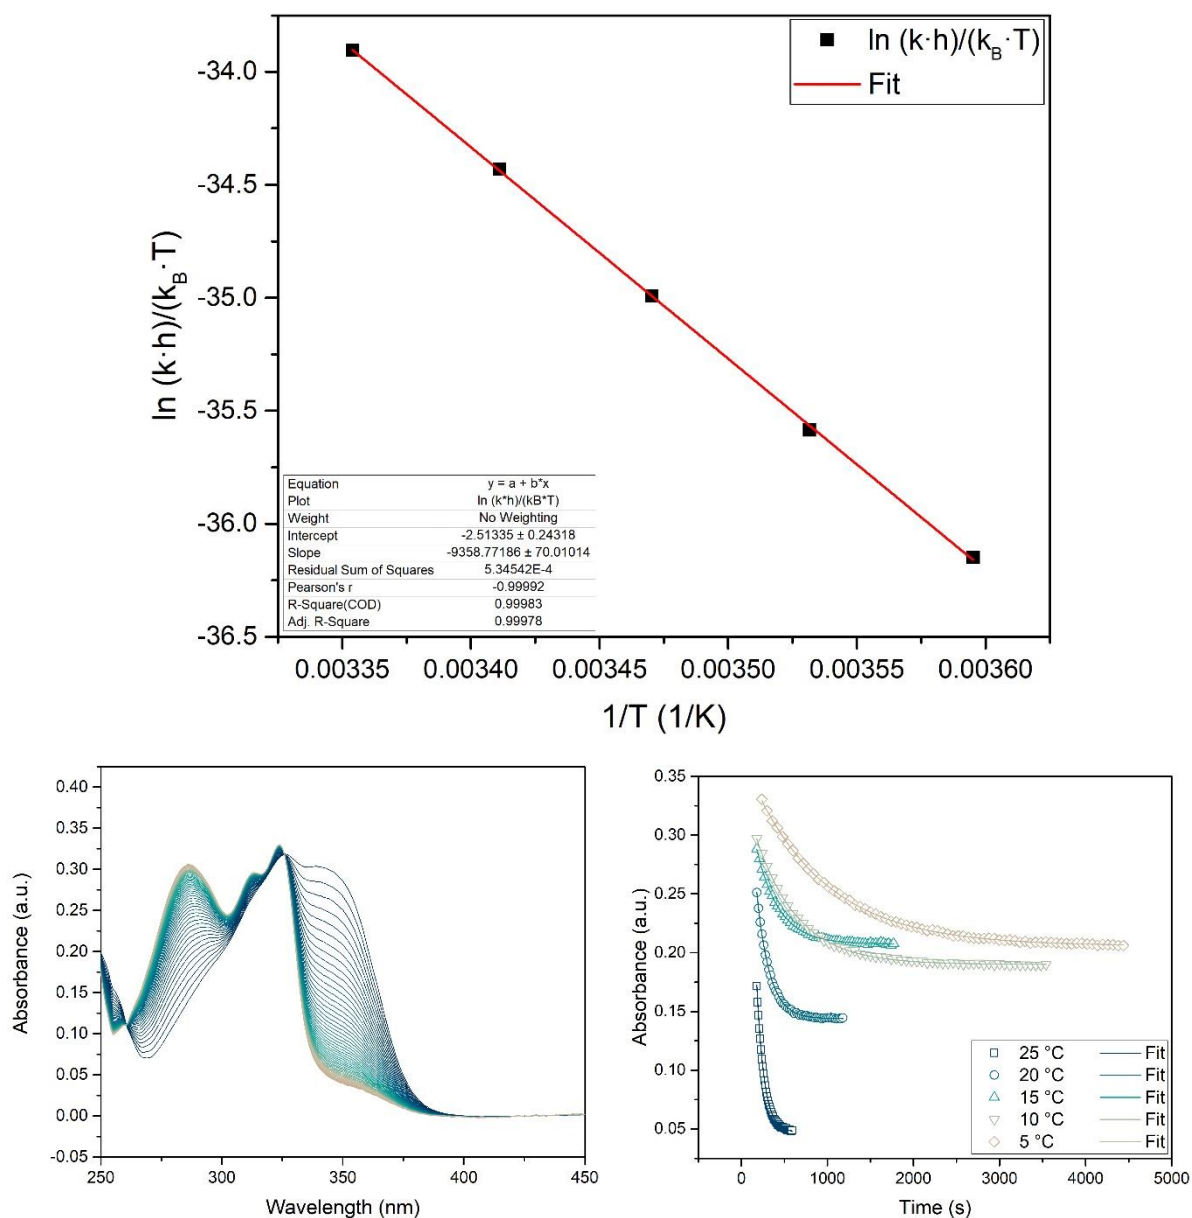

**Fig. S20 | Eyring analysis of thermal helix inversion from C22-E metastable to C22-E stable.** Rate constants were determined by UV/vis spectroscopy in octane (~20  $\mu$ M) at 5, 10, 15, 20 and 25  $^{\circ}$ C. Eyring plot (top), representative example for thermal isomerization followed by UV/vis spectroscopy at 5  $^{\circ}$ C (bottom left) and decay curves (bottom right). Start: blue spectrum, end: brown spectrum.

### Thermal helix inversion from C22-Z metastable to C22-Z stable

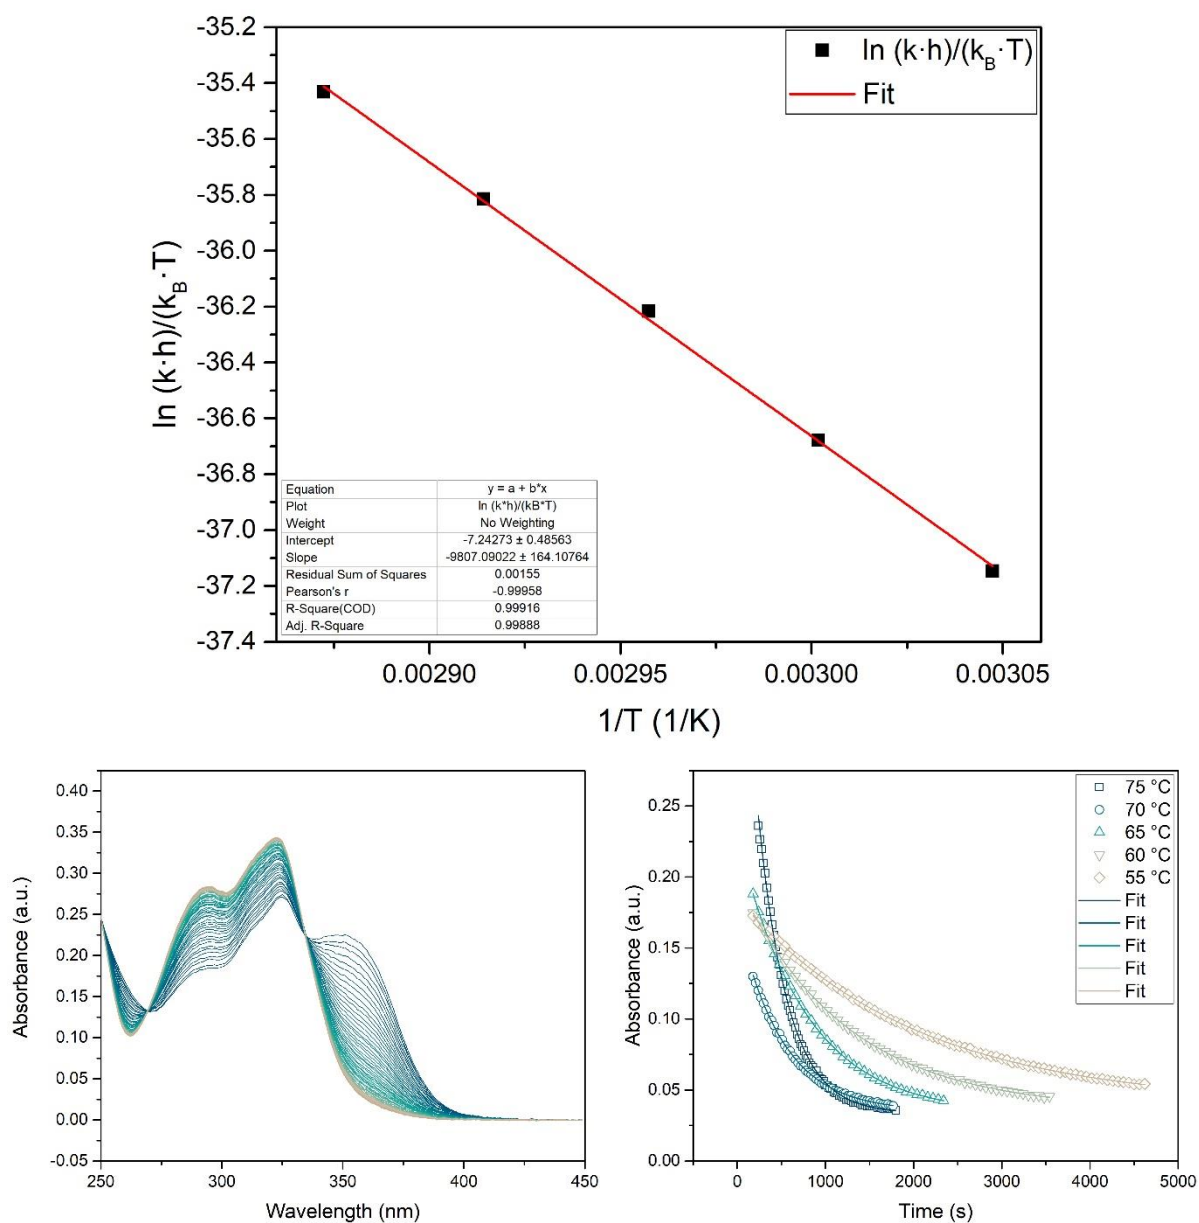

**Fig. S21 | Eyring analysis of thermal helix inversion from C22-Z metastable to C22-Z stable.** Rate constants were determined by UV/vis spectroscopy in octane ( $\sim 20 \mu\text{M}$ ) at 50, 55, 60, 65 and 70 °C. Eyring plot (top), representative example for thermal isomerization followed by UV/vis spectroscopy at 50 °C (bottom left) and decay curves (bottom right). Start: blue spectrum, end: brown spectrum.

### Thermal helix inversion from OMe-E metastable to OMe-E stable

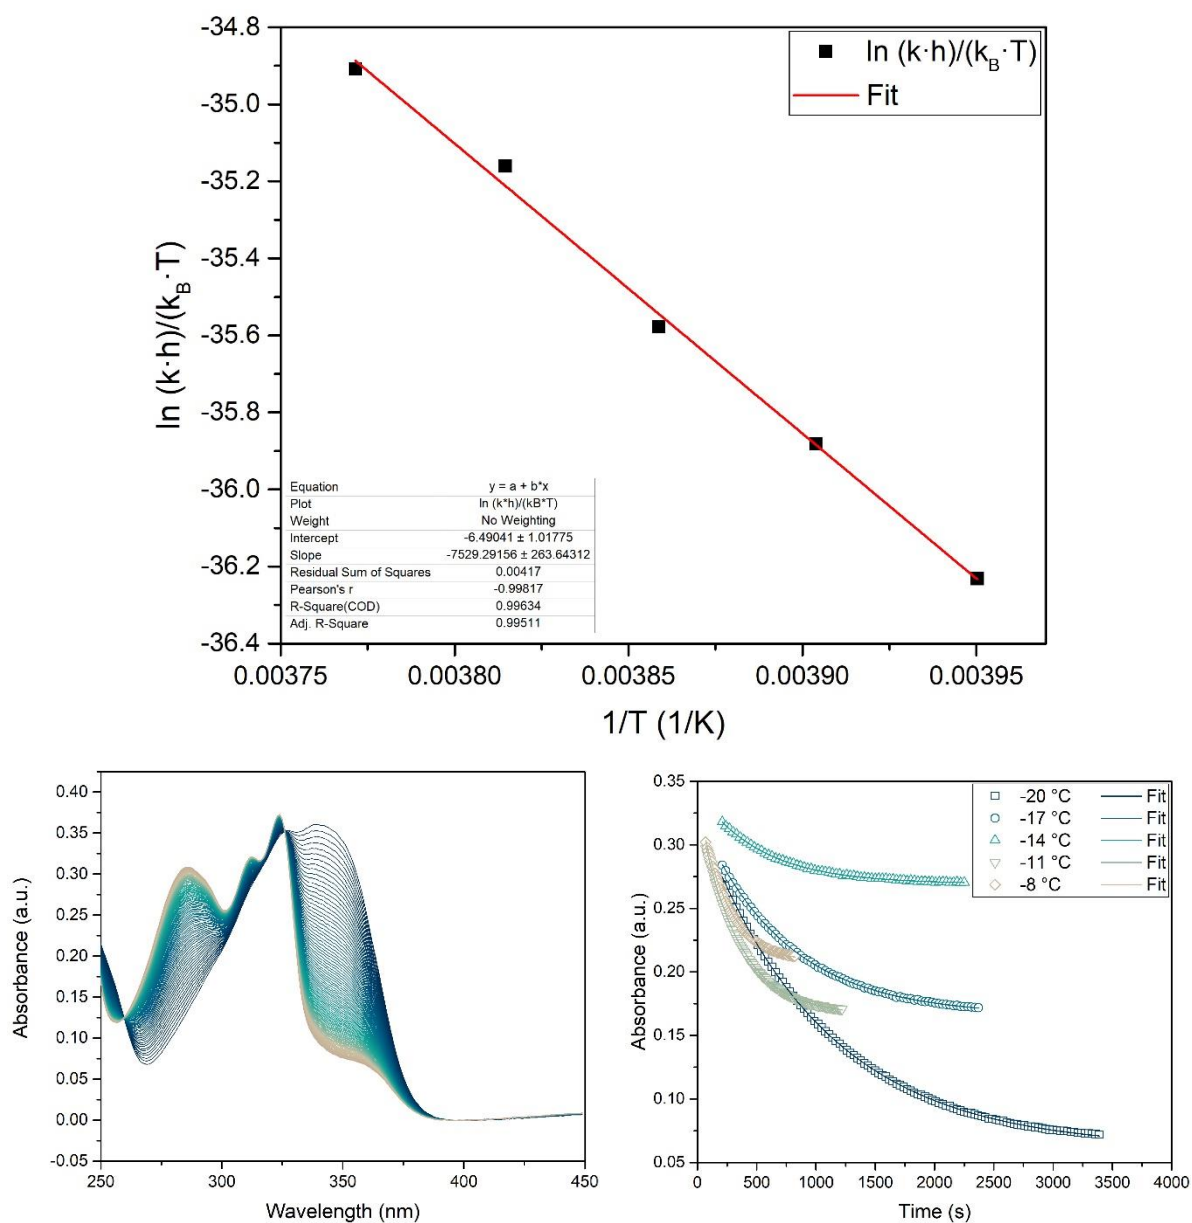

**Fig. S22 | Eyring analysis of thermal helix inversion from OMe-E metastable to OMe-E stable.** Rate constants were determined by UV/vis spectroscopy in octane ( $\sim 20 \mu\text{M}$ ) at  $-20$ ,  $-17$ ,  $-14$ ,  $-11$  and  $-8$  °C. Eyring plot (top), representative example for thermal isomerization followed by UV/vis spectroscopy at  $-20$  °C (bottom left) and decay curves (bottom right). Start: blue spectrum, end: brown spectrum.

### Thermal helix inversion from OMe-Z metastable to OMe-Z stable

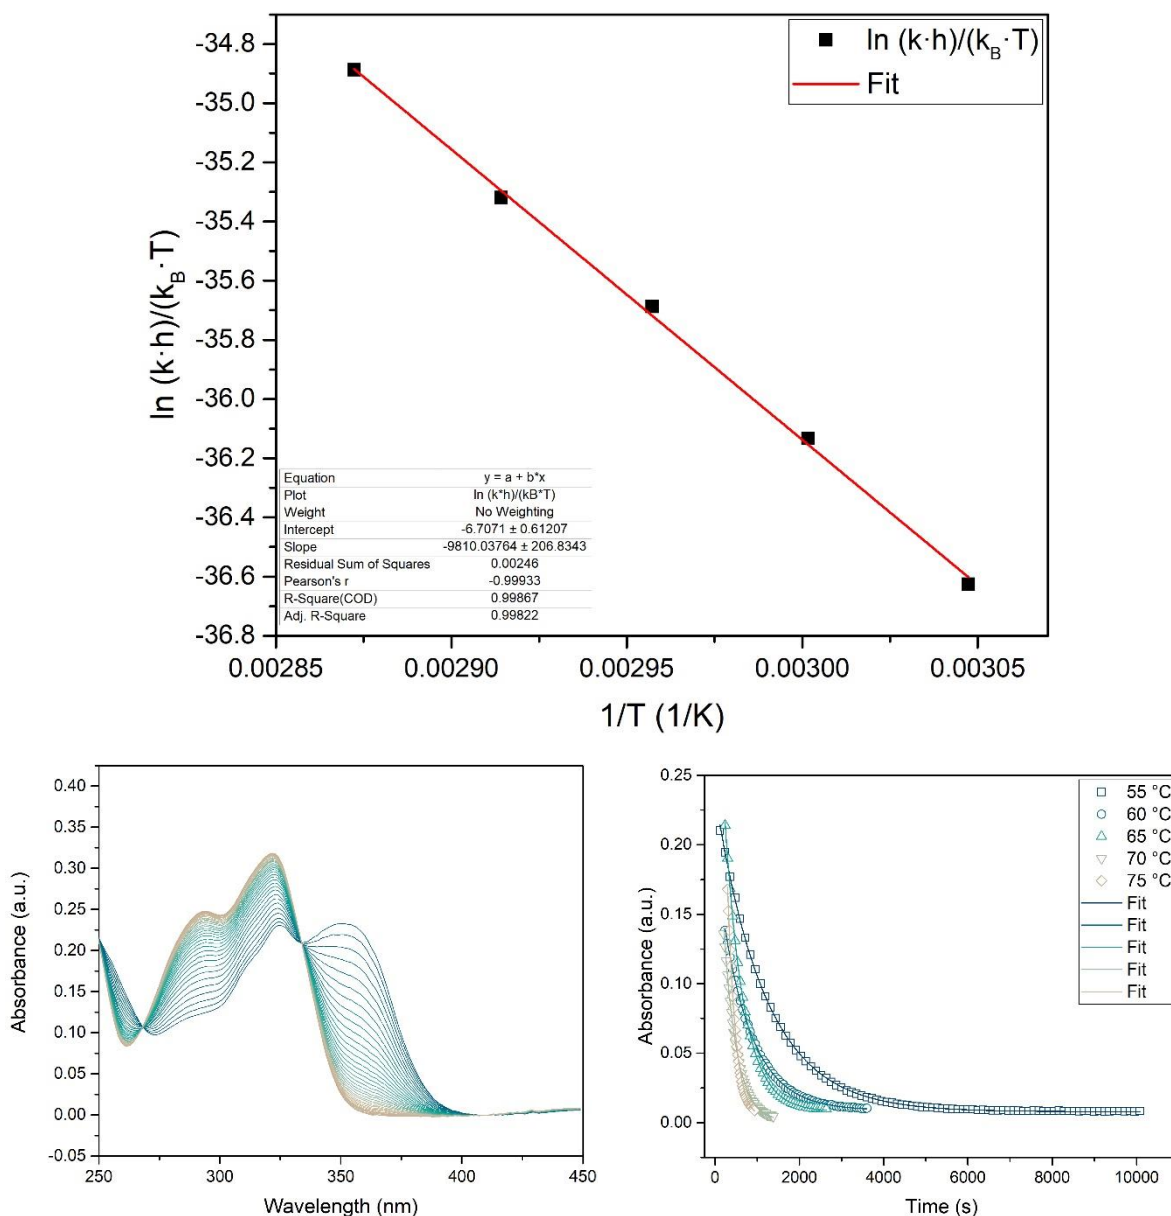

**Fig. S23 | Eyring analysis of thermal helix inversion from OMe-Z metastable to OMe-Z stable.** Rate constants were determined by UV/vis spectroscopy in octane ( $\sim 20 \mu\text{M}$ ) at 55, 60, 65, 70 and 75 °C. Eyring plot (top), representative example for thermal isomerization followed by UV/vis spectroscopy at 75 °C (bottom left) and decay curves (bottom right). Start: blue spectrum, end: brown spectrum.

## UV/vis spectroscopy

Degassed UV/vis samples in octane ( $\sim 20 \mu\text{M}$ ) were irradiated with a 300 nm LED (THORLABS, M300F2) at  $-15 \text{ }^\circ\text{C}$  ( $-20 \text{ }^\circ\text{C}$  in case of **OMe**).

### Switching behavior of C8

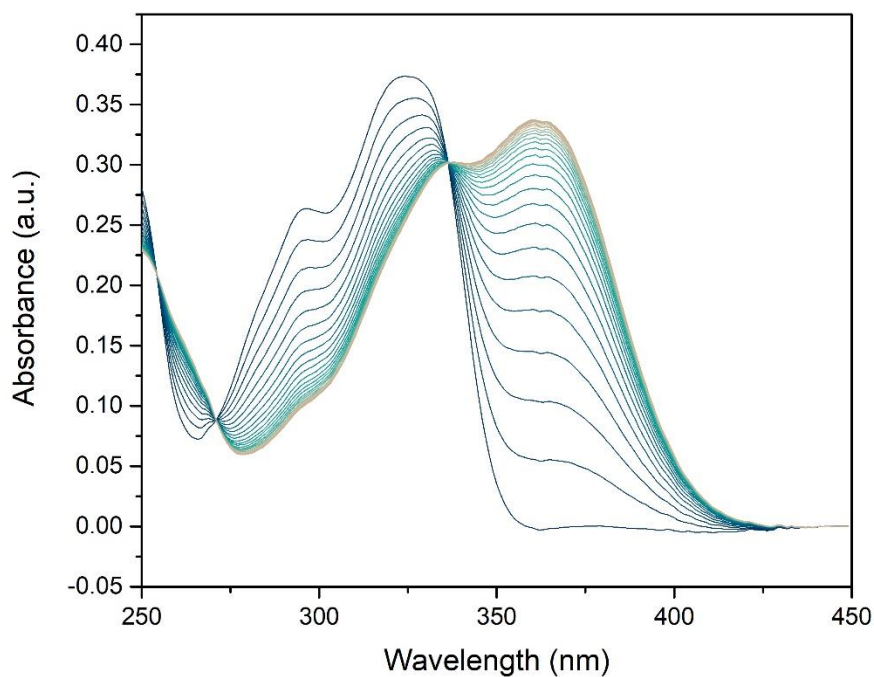

**Fig. S24 | Irradiation of C8 followed by UV/vis spectroscopy (octane,  $\sim 20 \mu\text{M}$ ,  $-15 \text{ }^\circ\text{C}$ ).** A solution of **C8-Z** stable was irradiated with 300 nm. Start: blue spectrum, end: brown spectrum.

### Switching behavior of C10

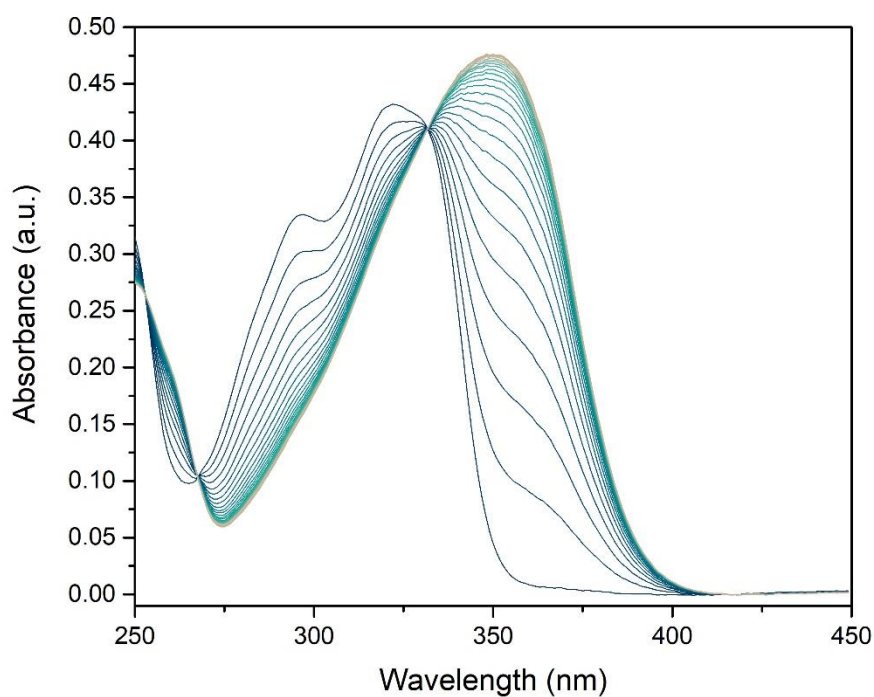

**Fig. S25 | Irradiation of C10 followed by UV/vis spectroscopy (octane,  $\sim 20 \mu\text{M}$ ,  $-15 \text{ }^\circ\text{C}$ ).** A solution of **C10-Z** stable was irradiated with 300 nm. Start: blue spectrum, end: brown spectrum.

### Switching behavior of C12

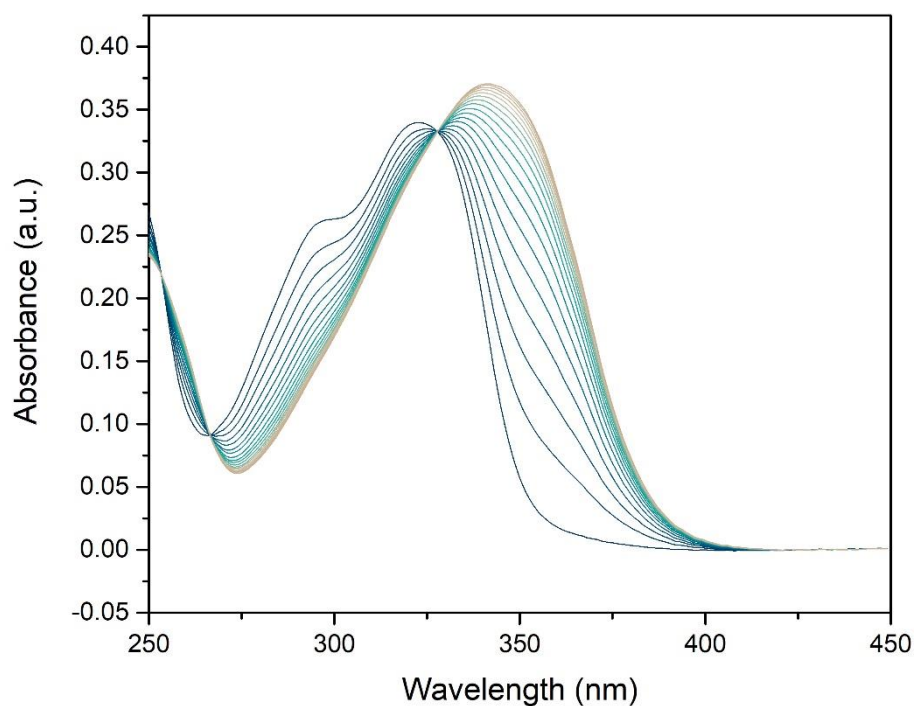

**Fig. S26 | Irradiation of C12 followed by UV/vis spectroscopy (octane,  $\sim 20 \mu\text{M}$ ,  $-15 \text{ }^\circ\text{C}$ ).** A solution of C12-Z stable was irradiated with 300 nm. Start: blue spectrum, end: brown spectrum.

### Switching behavior of C14

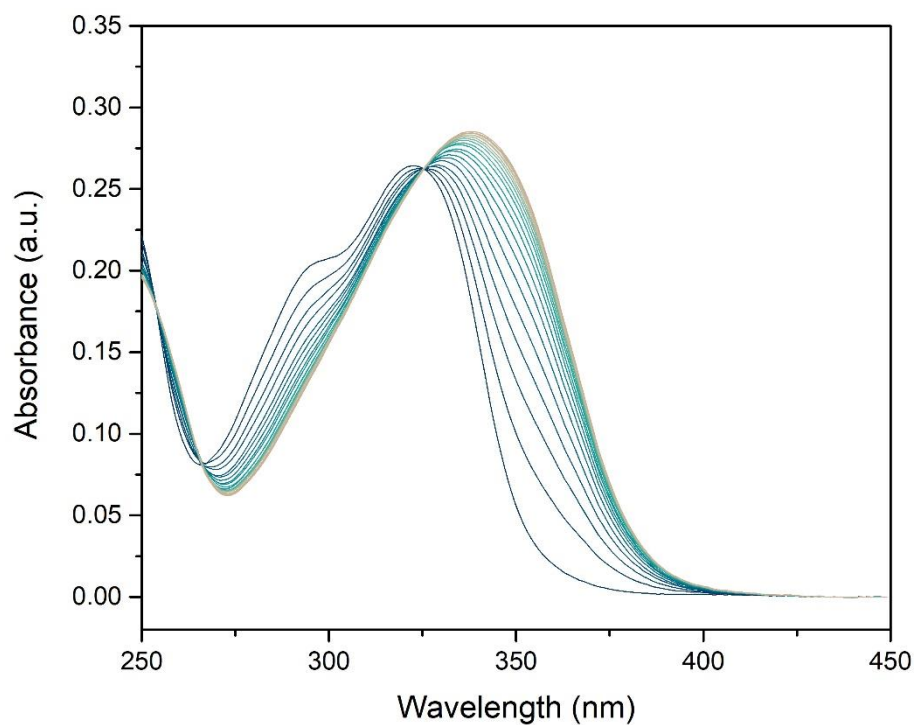

**Fig. S27 | Irradiation of C14 followed by UV/vis spectroscopy (octane,  $\sim 20 \mu\text{M}$ ,  $-15 \text{ }^\circ\text{C}$ ).** A solution of C14-Z stable was irradiated with 300 nm. Start: blue spectrum, end: brown spectrum.



## Switching behavior of C16

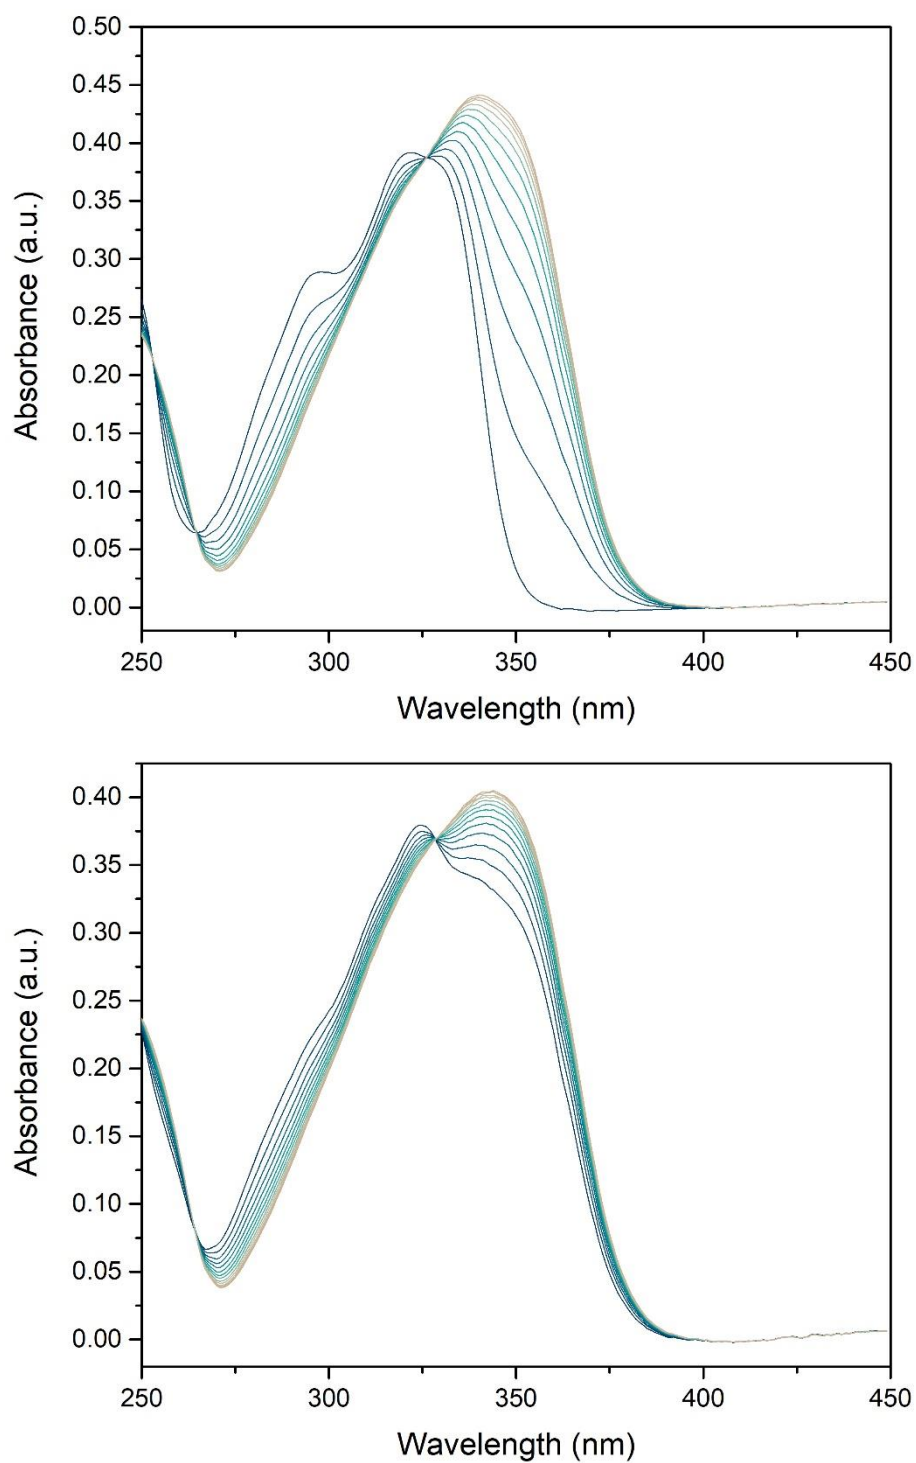

**Fig. S28 | Irradiation of C16 followed by UV/vis spectroscopy (octane,  $\sim 20 \mu\text{M}$ ,  $-15 \text{ }^\circ\text{C}$ ).** A solution of C16-Z stable was irradiated with 300 nm (top) to PSS. After full thermal relaxation, the same solution was irradiated again with 300 nm (bottom) to PSS. Start: blue spectrum, end: brown spectrum.

## Switching behavior of C18

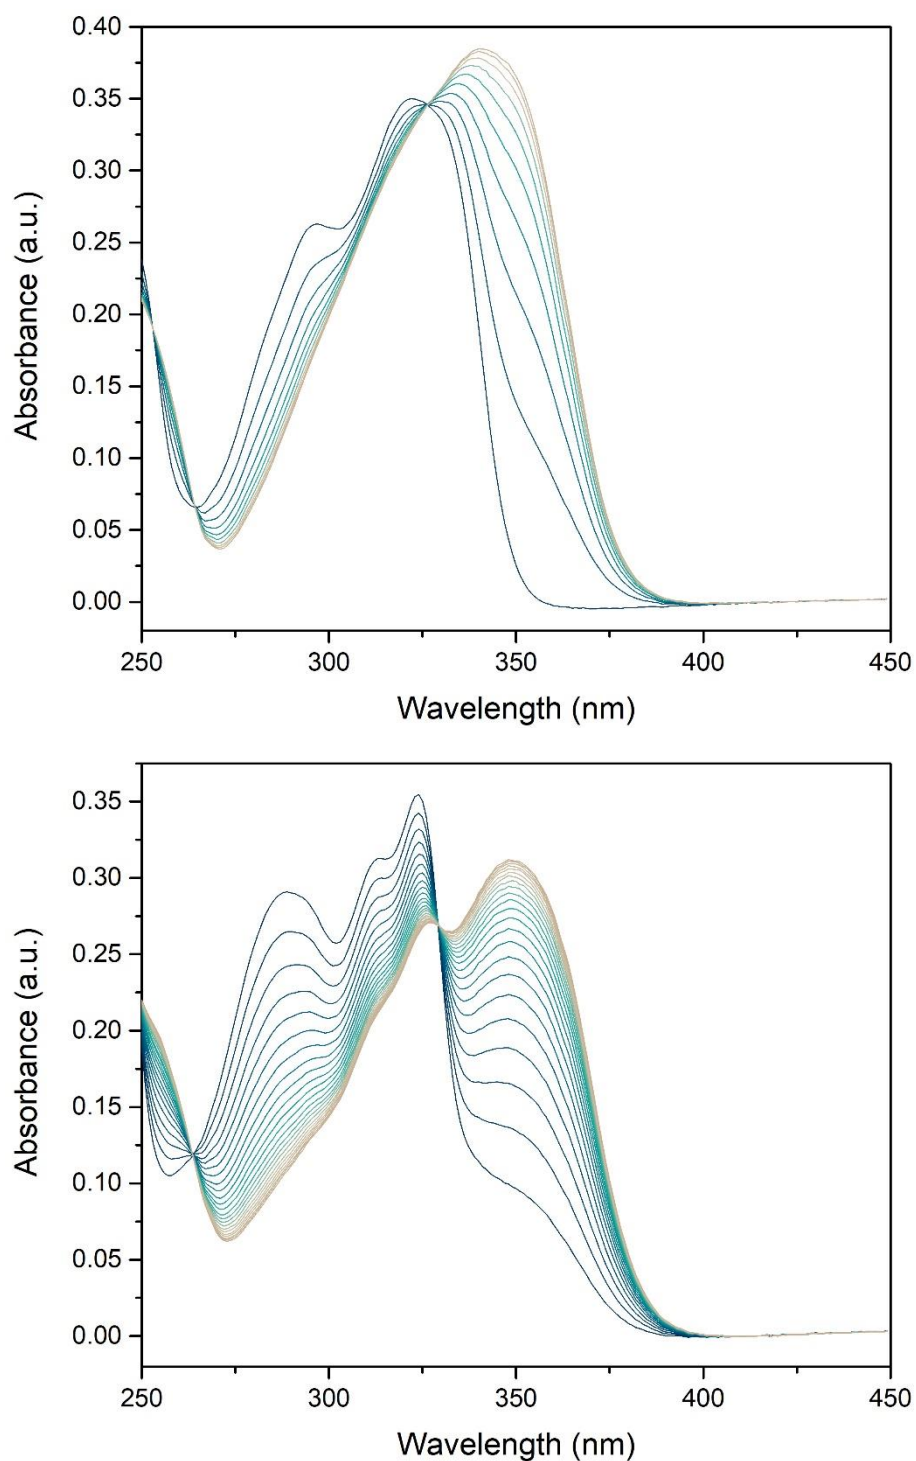

**Fig. S29 | Irradiation of C18 followed by UV/vis spectroscopy (octane,  $\sim 20 \mu\text{M}$ ,  $-15 \text{ }^\circ\text{C}$ ).** A solution of C18-Z stable was irradiated with 300 nm (top) to PSS. After full thermal relaxation, the same solution was irradiated again with 300 nm (bottom) to PSS. Start: blue spectrum, end: brown spectrum.

### Switching behavior of C20

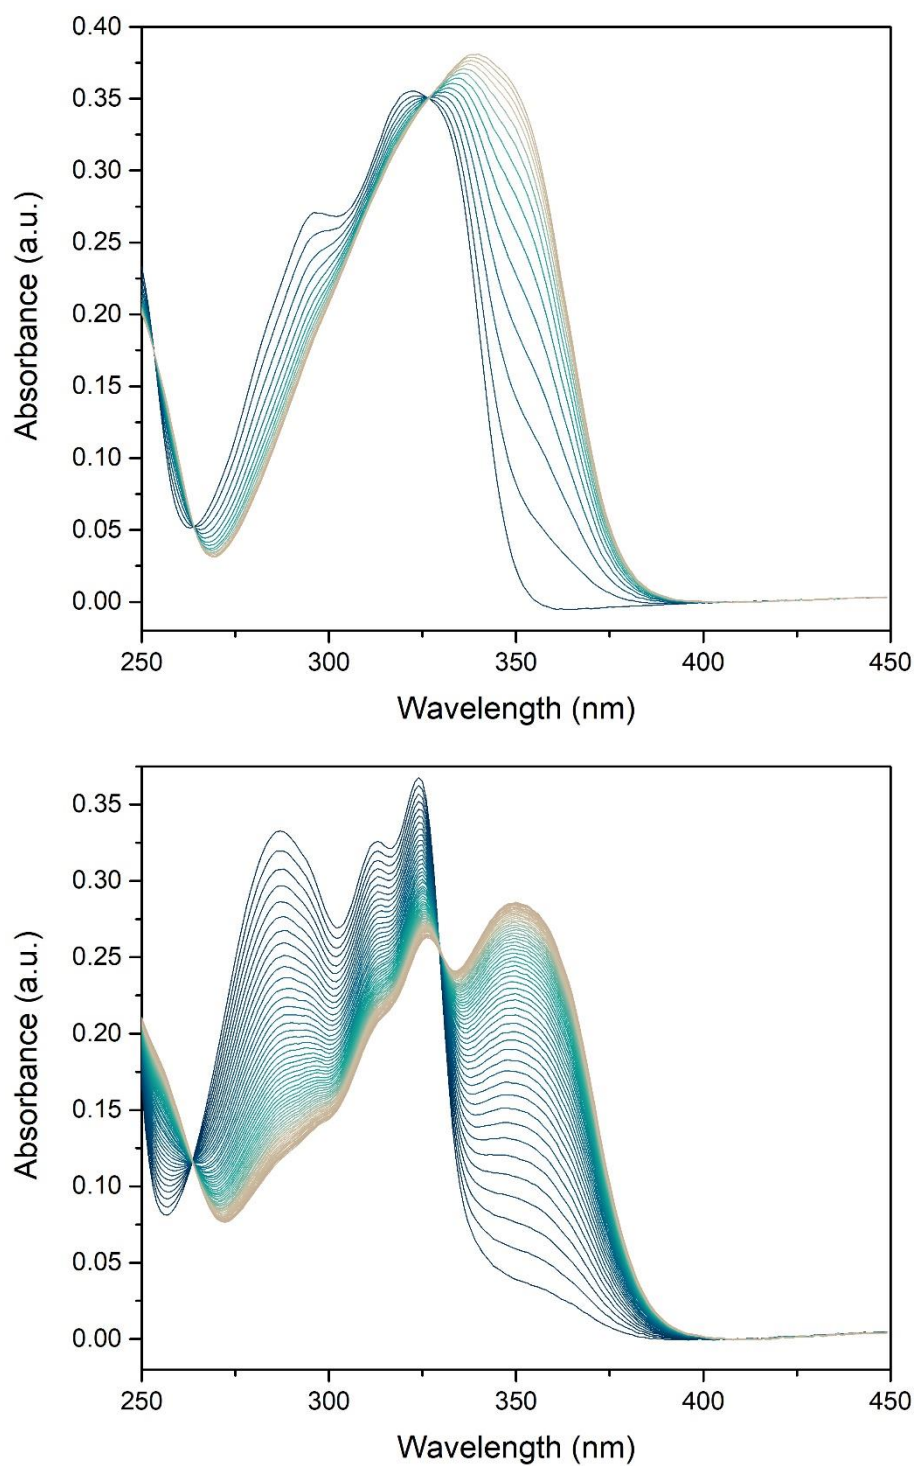

**Fig. S30 | Irradiation of C20 followed by UV/vis spectroscopy (octane,  $\sim 20 \mu\text{M}$ ,  $-15 \text{ }^\circ\text{C}$ ).** A solution of C20-Z stable was irradiated with 300 nm (top) to PSS. After full thermal relaxation, the same solution was irradiated again with 300 nm (bottom) to PSS. Start: blue spectrum, end: brown spectrum.

### Switching behavior of C22

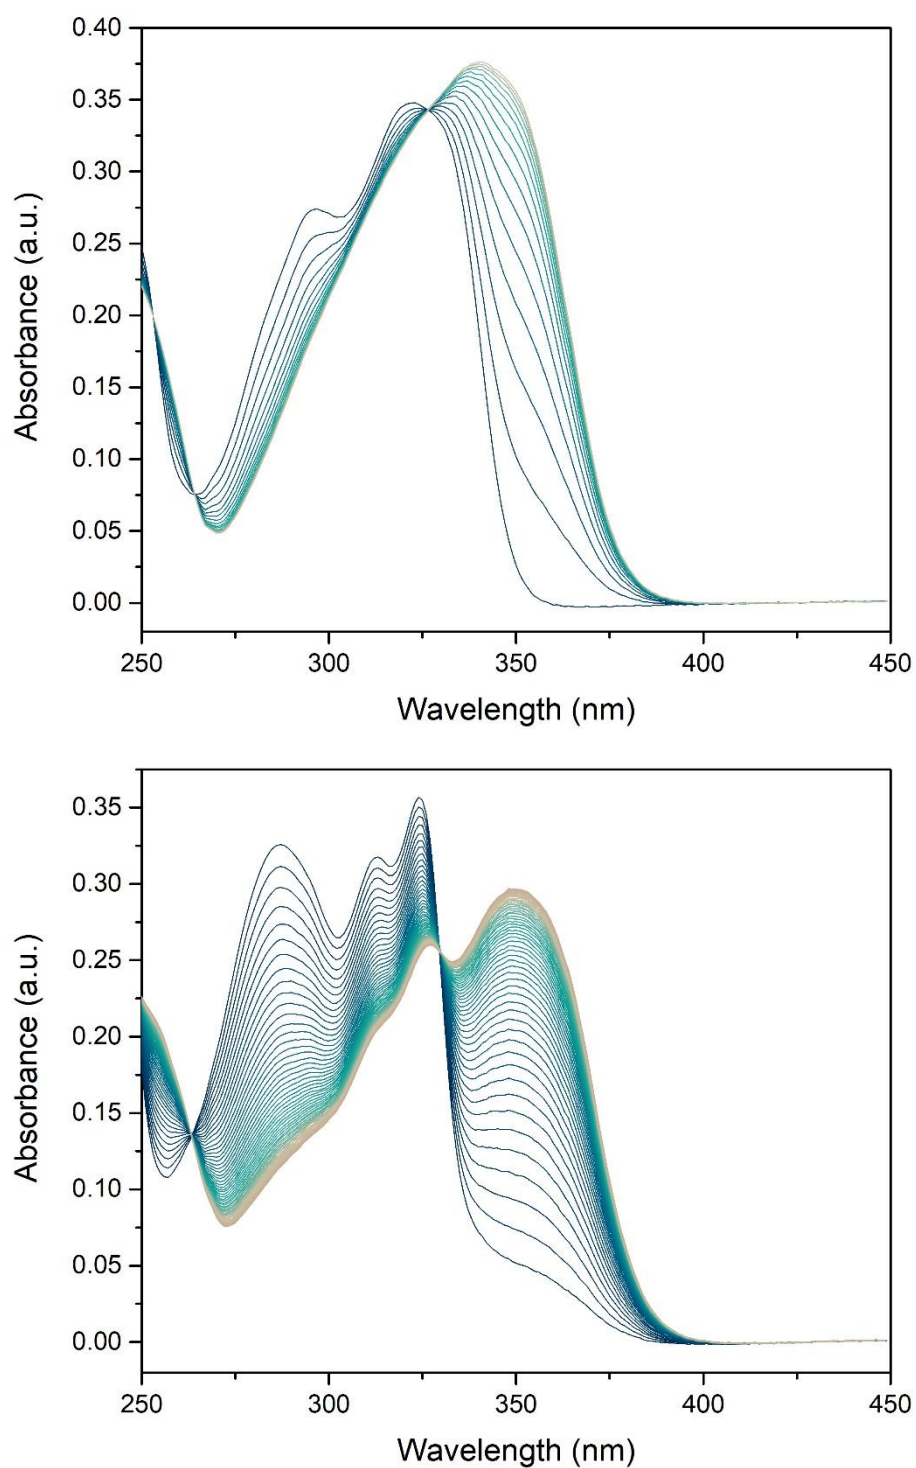

**Fig. S31 | Irradiation of C22 followed by UV/vis spectroscopy (octane,  $\sim 20 \mu\text{M}$ ,  $-15 \text{ }^\circ\text{C}$ ).** A solution of C22-Z stable was irradiated with 300 nm (top) to PSS. After full thermal relaxation, the same solution was irradiated again with 300 nm (bottom) to PSS. Start: blue spectrum, end: brown spectrum.

### Switching behavior of OMe

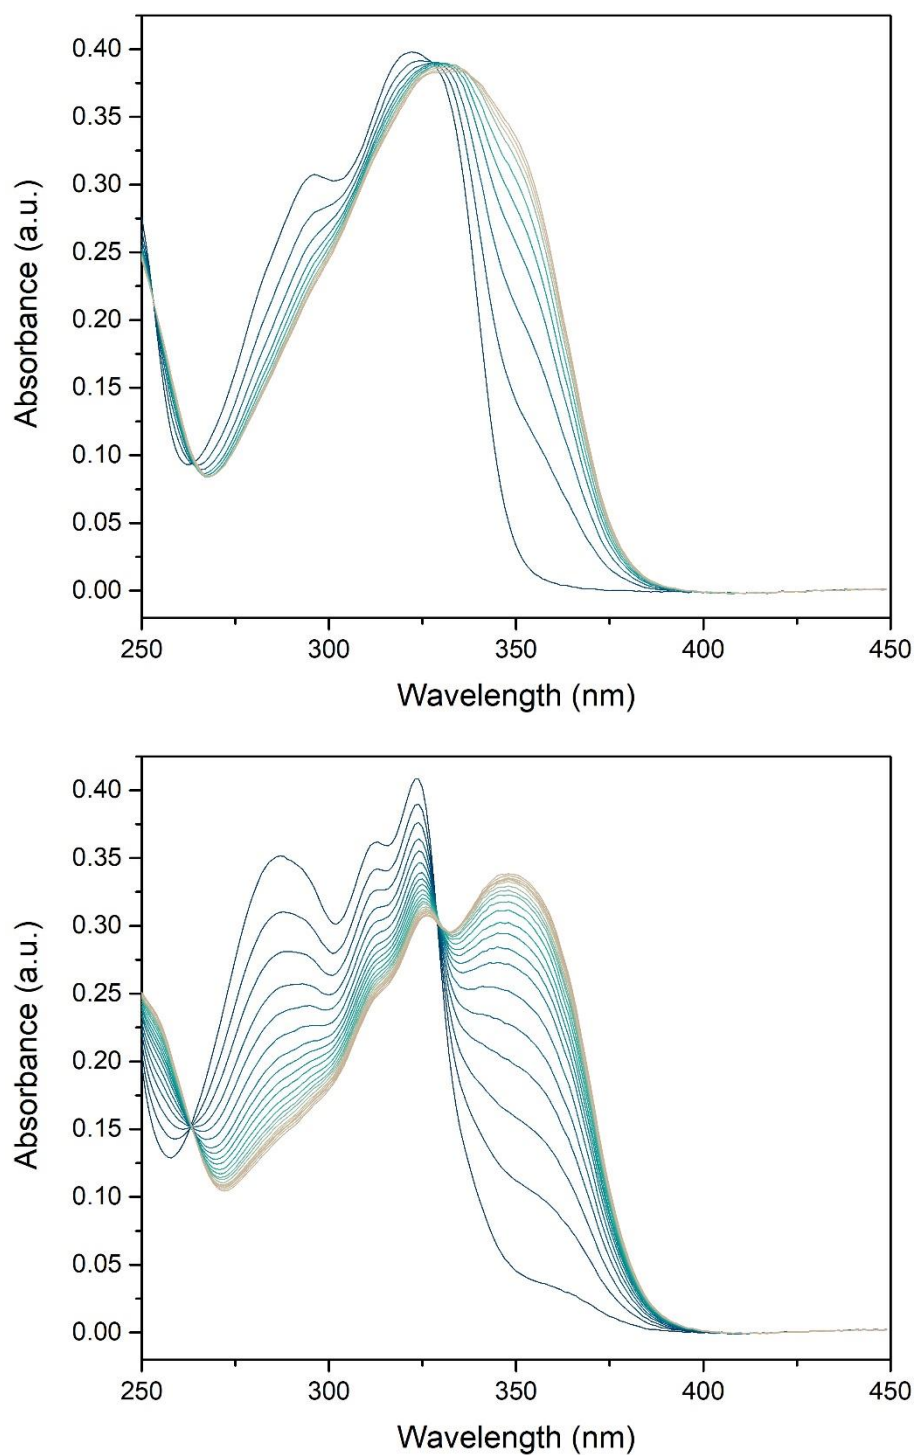

**Fig. S32 | Irradiation of OMe followed by UV/vis spectroscopy (octane,  $\sim 20 \mu\text{M}$ ,  $-20 \text{ }^\circ\text{C}$ ).** A solution of **OMe-Z** stable was irradiated with 300 nm (top) for 270 s. After full thermal relaxation, the same solution was irradiated again with 300 nm (bottom) for 630 s. Note that the half-life of **OMe-E** metastable is 12 min at  $-20 \text{ }^\circ\text{C}$ ; therefore, no isosbestic points were observed. Start: blue spectrum, end: brown spectrum.

## References

- [1] C. Schink, S. Spielvogel, W. Imhof, *J. Label. Compd. Radiopharm.* **2021**, *64*, 14–29.
- [2] T. van Leeuwen, J. Gan, J. C. M. Kistemaker, S. F. Pizzolato, M.-C. Chang, B. L. Feringa, *Chem. – A Eur. J.* **2016**, *22*, 7054–7058.
- [3] B. K. Vriesema, J. Buter, R. M. Kellogg, *J. Org. Chem.* **2002**, *49*, 110–113.
- [4] V. Martí-Centelles, M. D. Pandey, M. I. Burguete, S. V. Luis, *Chem. Rev.* **2015**, *115*, 8736–8834.

## Appendix - X-ray analysis

### OMe-Zs

Suitable single crystals for X-Ray analysis were obtained by slow diffusion of a methanol layer into a chloroform solution of **OMe-Zs**. Ellipsoids drawn at 50% probability; hydrogen atoms are omitted for clarity.

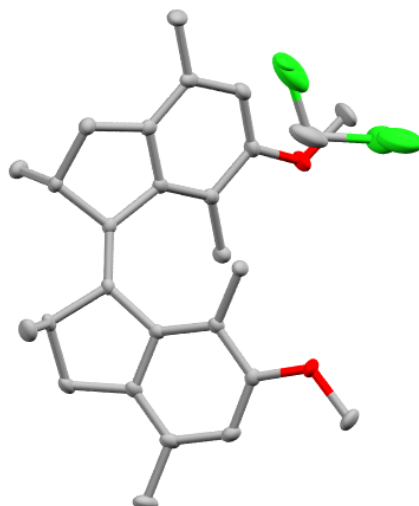

#### Crystal data and structure refinement for **OMe-Zs**.

|                                             |                                                                |
|---------------------------------------------|----------------------------------------------------------------|
| Identification code                         | cu_MKomeZ3_0m_a                                                |
| Empirical formula                           | C <sub>27</sub> H <sub>34</sub> Cl <sub>2</sub> O <sub>2</sub> |
| Formula weight                              | 461.44                                                         |
| Temperature/K                               | 100.0                                                          |
| Crystal system                              | orthorhombic                                                   |
| Space group                                 | Pbca                                                           |
| a/Å                                         | 14.746(2)                                                      |
| b/Å                                         | 14.851(2)                                                      |
| c/Å                                         | 22.351(3)                                                      |
| $\alpha$ /°                                 | 90                                                             |
| $\beta$ /°                                  | 90                                                             |
| $\gamma$ /°                                 | 90                                                             |
| Volume/Å <sup>3</sup>                       | 4894.8(12)                                                     |
| Z                                           | 8                                                              |
| $\rho_{\text{calc}}$ /cm <sup>3</sup>       | 1.252                                                          |
| $\mu$ /mm <sup>-1</sup>                     | 2.539                                                          |
| F(000)                                      | 1968.0                                                         |
| Crystal size/mm <sup>3</sup>                | 0.718 × 0.66 × 0.526                                           |
| Radiation                                   | CuK $\alpha$ ( $\lambda$ = 1.54178)                            |
| 2 $\theta$ range for data collection/°      | 7.91 to 142.216                                                |
| Index ranges                                | -18 ≤ h ≤ 17, -18 ≤ k ≤ 18, -27 ≤ l ≤ 27                       |
| Reflections collected                       | 102290                                                         |
| Independent reflections                     | 4662 [R <sub>int</sub> = 0.0891, R <sub>sigma</sub> = 0.0387]  |
| Data/restraints/parameters                  | 4662/0/309                                                     |
| Goodness-of-fit on F <sup>2</sup>           | 1.065                                                          |
| Final R indexes [ $I$ ≥ 2 $\sigma$ ( $I$ )] | R <sub>1</sub> = 0.0443, wR <sub>2</sub> = 0.1141              |
| Final R indexes [all data]                  | R <sub>1</sub> = 0.0478, wR <sub>2</sub> = 0.1205              |
| Largest diff. peak/hole / e Å <sup>-3</sup> | 0.36/-0.29                                                     |

## OMe-E stable

Suitable single crystals for X-Ray analysis were obtained by slow solvent evaporation of a pentane solution of **OMe-Es**. Ellipsoids drawn at 50% probability; hydrogen atoms are omitted for clarity.

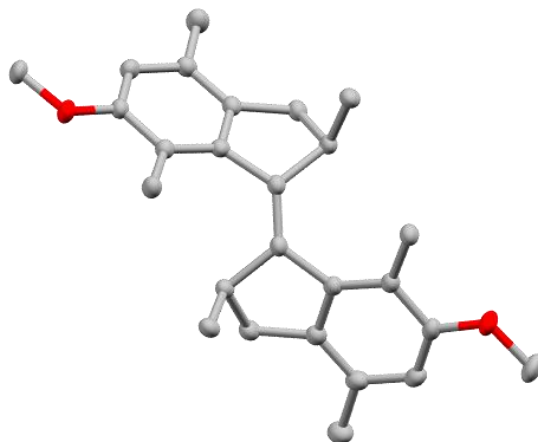

### Crystal data and structure refinement for **OMe-Es**

|                                             |                                                               |
|---------------------------------------------|---------------------------------------------------------------|
| Identification code                         | cu_MKomeE_0m                                                  |
| Empirical formula                           | C <sub>26</sub> H <sub>32</sub> O <sub>2</sub>                |
| Formula weight                              | 376.51                                                        |
| Temperature/K                               | 100.0                                                         |
| Crystal system                              | monoclinic                                                    |
| Space group                                 | P2 <sub>1</sub> /n                                            |
| a/Å                                         | 11.9655(4)                                                    |
| b/Å                                         | 12.9546(4)                                                    |
| c/Å                                         | 13.8621(5)                                                    |
| α/°                                         | 90                                                            |
| β/°                                         | 93.7040(10)                                                   |
| γ/°                                         | 90                                                            |
| Volume/Å <sup>3</sup>                       | 2144.25(12)                                                   |
| Z                                           | 4                                                             |
| ρ <sub>calc</sub> /cm <sup>3</sup>          | 1.166                                                         |
| μ/mm <sup>-1</sup>                          | 0.553                                                         |
| F(000)                                      | 816.0                                                         |
| Crystal size/mm <sup>3</sup>                | 0.356 × 0.267 × 0.135                                         |
| Radiation                                   | CuKα (λ = 1.54178)                                            |
| 2θ range for data collection/°              | 9.352 to 149.284                                              |
| Index ranges                                | -14 ≤ h ≤ 14, -16 ≤ k ≤ 16, -17 ≤ l ≤ 16                      |
| Reflections collected                       | 44577                                                         |
| Independent reflections                     | 4336 [R <sub>int</sub> = 0.1050, R <sub>sigma</sub> = 0.0691] |
| Data/restraints/parameters                  | 4336/0/262                                                    |
| Goodness-of-fit on F <sup>2</sup>           | 1.115                                                         |
| Final R indexes [I ≥ 2σ (I)]                | R <sub>1</sub> = 0.0552, wR <sub>2</sub> = 0.1549             |
| Final R indexes [all data]                  | R <sub>1</sub> = 0.0742, wR <sub>2</sub> = 0.1599             |
| Largest diff. peak/hole / e Å <sup>-3</sup> | 0.38/-0.29                                                    |



## C8-Zs

Suitable single crystals for X-Ray analysis were obtained by slow diffusion of a methanol layer into a chloroform solution of C8-Zs. Ellipsoids drawn at 50% probability; hydrogen atoms are omitted for clarity.

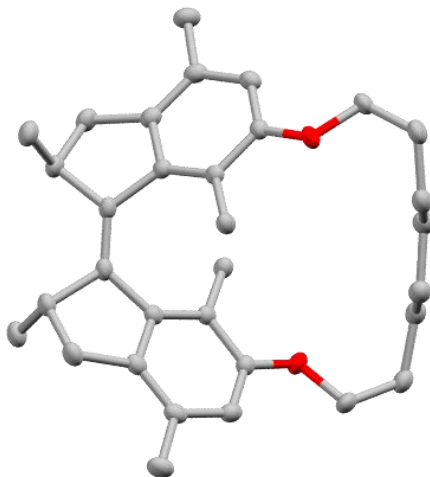

### Crystal data and structure refinement for C8-Zs

|                                             |                                                               |
|---------------------------------------------|---------------------------------------------------------------|
| Identification code                         | cu_MKcisC8_0m_a                                               |
| Empirical formula                           | C <sub>32</sub> H <sub>42</sub> O <sub>2</sub>                |
| Formula weight                              | 458.65                                                        |
| Temperature/K                               | 100.0                                                         |
| Crystal system                              | monoclinic                                                    |
| Space group                                 | C2/c                                                          |
| a/Å                                         | 20.7965(7)                                                    |
| b/Å                                         | 12.4119(4)                                                    |
| c/Å                                         | 11.1170(4)                                                    |
| α/°                                         | 90                                                            |
| β/°                                         | 114.9890(10)                                                  |
| γ/°                                         | 90                                                            |
| Volume/Å <sup>3</sup>                       | 2600.94(15)                                                   |
| Z                                           | 4                                                             |
| ρ <sub>calc</sub> /cm <sup>3</sup>          | 1.171                                                         |
| μ/mm <sup>-1</sup>                          | 0.540                                                         |
| F(000)                                      | 1000.0                                                        |
| Crystal size/mm <sup>3</sup>                | 0.246 × 0.235 × 0.102                                         |
| Radiation                                   | CuKα (λ = 1.54178)                                            |
| 2θ range for data collection/°              | 8.53 to 136.572                                               |
| Index ranges                                | -24 ≤ h ≤ 24, -14 ≤ k ≤ 14, -11 ≤ l ≤ 13                      |
| Reflections collected                       | 20224                                                         |
| Independent reflections                     | 2374 [R <sub>int</sub> = 0.0541, R <sub>sigma</sub> = 0.0331] |
| Data/restraints/parameters                  | 2374/0/158                                                    |
| Goodness-of-fit on F <sup>2</sup>           | 1.149                                                         |
| Final R indexes [I ≥ 2σ (I)]                | R <sub>1</sub> = 0.0433, wR <sub>2</sub> = 0.1100             |
| Final R indexes [all data]                  | R <sub>1</sub> = 0.0495, wR <sub>2</sub> = 0.1260             |
| Largest diff. peak/hole / e Å <sup>-3</sup> | 0.48/-0.34                                                    |

## C12-Zs

Suitable single crystals for X-Ray analysis were obtained by slow diffusion of a methanol layer into a chloroform solution of C12-Zs. Ellipsoids drawn at 50% probability; hydrogen atoms are omitted for clarity.

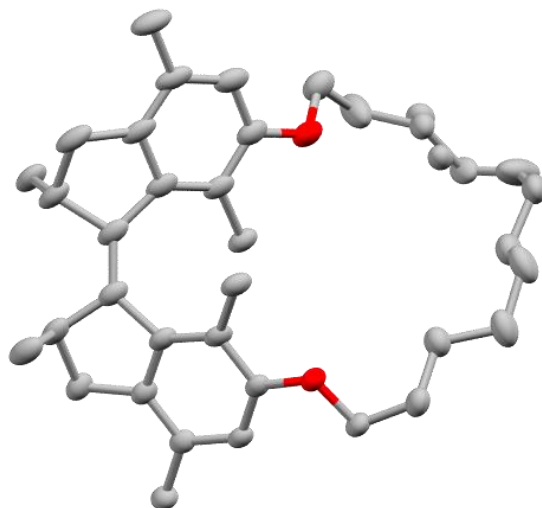

### Crystal data and structure refinement for C12-Zs.

|                                             |                                                               |
|---------------------------------------------|---------------------------------------------------------------|
| Identification code                         | cu_MKC12_0ma_a                                                |
| Empirical formula                           | C <sub>36</sub> H <sub>50</sub> O <sub>2</sub>                |
| Formula weight                              | 514.76                                                        |
| Temperature/K                               | 100.0                                                         |
| Crystal system                              | monoclinic                                                    |
| Space group                                 | P2 <sub>1</sub> /c                                            |
| a/Å                                         | 13.6901(5)                                                    |
| b/Å                                         | 21.3691(6)                                                    |
| c/Å                                         | 10.5948(3)                                                    |
| α/°                                         | 90                                                            |
| β/°                                         | 103.2090(10)                                                  |
| γ/°                                         | 90                                                            |
| Volume/Å <sup>3</sup>                       | 3017.45(16)                                                   |
| Z                                           | 4                                                             |
| ρ <sub>calc</sub> /cm <sup>3</sup>          | 1.133                                                         |
| μ/mm <sup>-1</sup>                          | 0.514                                                         |
| F(000)                                      | 1128.0                                                        |
| Crystal size/mm <sup>3</sup>                | 0.27 × 0.23 × 0.03                                            |
| Radiation                                   | CuKα (λ = 1.54178)                                            |
| 2θ range for data collection/°              | 7.818 to 136.66                                               |
| Index ranges                                | -16 ≤ h ≤ 16, -25 ≤ k ≤ 25, -11 ≤ l ≤ 12                      |
| Reflections collected                       | 47317                                                         |
| Independent reflections                     | 5313 [R <sub>int</sub> = 0.1084, R <sub>sigma</sub> = 0.0572] |
| Data/restraints/parameters                  | 5313/0/370                                                    |
| Goodness-of-fit on F <sup>2</sup>           | 1.052                                                         |
| Final R indexes [I ≥ 2σ (I)]                | R <sub>1</sub> = 0.0782, wR <sub>2</sub> = 0.1745             |
| Final R indexes [all data]                  | R <sub>1</sub> = 0.1075, wR <sub>2</sub> = 0.2029             |
| Largest diff. peak/hole / e Å <sup>-3</sup> | 0.24/-0.26                                                    |

## C12-Em

**C12-Em** was prepared by irradiating 10 mg of **C12-Zs** in 100 mL of dry and degassed toluene with 313 nm (Vilber Lourmat, 6W) for 30 min. After evaporation of toluene, suitable single crystals for X-Ray analysis were obtained by slow solvent evaporation of a pentane solution of **C12-Em**. Ellipsoids drawn at 50% probability; hydrogen atoms are omitted for clarity.

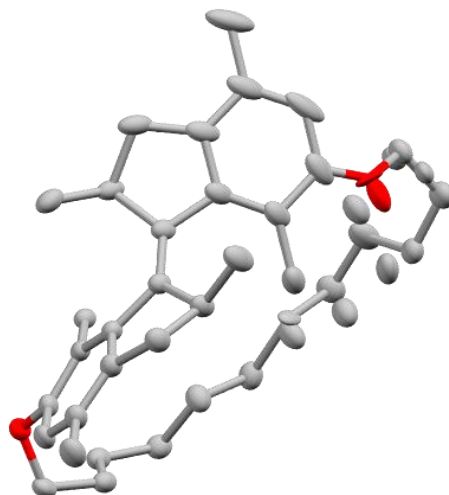

### Crystal data and structure refinement for C12-Em.

|                                             |                                                               |
|---------------------------------------------|---------------------------------------------------------------|
| Identification code                         | cu_MKtransC12_0m_a                                            |
| Empirical formula                           | C <sub>36</sub> H <sub>50</sub> O <sub>2</sub>                |
| Formula weight                              | 514.76                                                        |
| Temperature/K                               | 100.0                                                         |
| Crystal system                              | monoclinic                                                    |
| Space group                                 | P2 <sub>1</sub> /n                                            |
| a/Å                                         | 14.5668(4)                                                    |
| b/Å                                         | 10.4353(3)                                                    |
| c/Å                                         | 19.9879(5)                                                    |
| α/°                                         | 90                                                            |
| β/°                                         | 93.1350(10)                                                   |
| γ/°                                         | 90                                                            |
| Volume/Å <sup>3</sup>                       | 3033.79(14)                                                   |
| Z                                           | 4                                                             |
| ρ <sub>calc</sub> /cm <sup>3</sup>          | 1.127                                                         |
| μ/mm <sup>-1</sup>                          | 0.511                                                         |
| F(000)                                      | 1128.0                                                        |
| Crystal size/mm <sup>3</sup>                | 0.219 × 0.129 × 0.086                                         |
| Radiation                                   | CuKα (λ = 1.54178)                                            |
| 2θ range for data collection/°              | 7.322 to 144.334                                              |
| Index ranges                                | -17 ≤ h ≤ 17, -12 ≤ k ≤ 12, -24 ≤ l ≤ 24                      |
| Reflections collected                       | 69537                                                         |
| Independent reflections                     | 5973 [R <sub>int</sub> = 0.0491, R <sub>sigma</sub> = 0.0179] |
| Data/restraints/parameters                  | 5973/444/516                                                  |
| Goodness-of-fit on F <sup>2</sup>           | 1.026                                                         |
| Final R indexes [I ≥ 2σ (I)]                | R <sub>1</sub> = 0.0352, wR <sub>2</sub> = 0.0866             |
| Final R indexes [all data]                  | R <sub>1</sub> = 0.0432, wR <sub>2</sub> = 0.0935             |
| Largest diff. peak/hole / e Å <sup>-3</sup> | 0.21/-0.18                                                    |

# Appendix - NMR spectra (400 MHz, 25 °C, CDCl<sub>3</sub>)

## C8-Zs

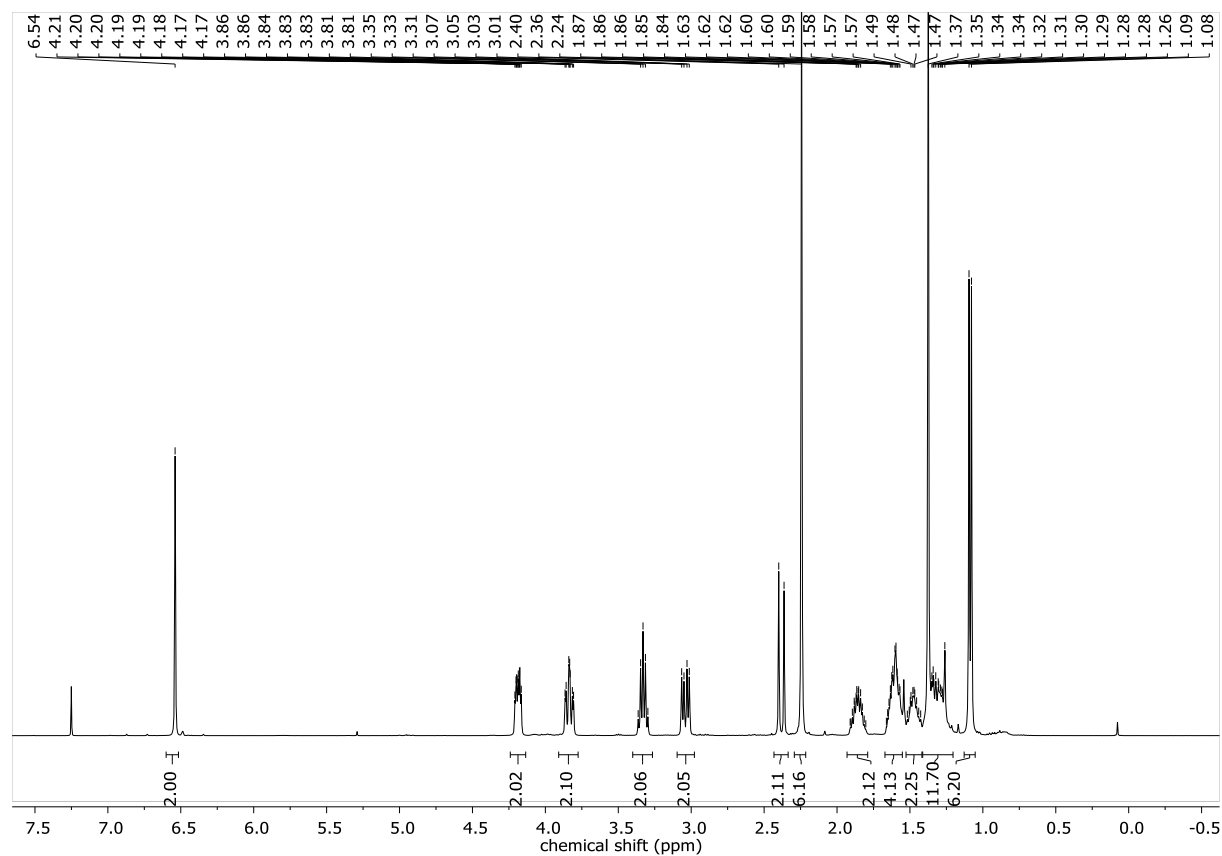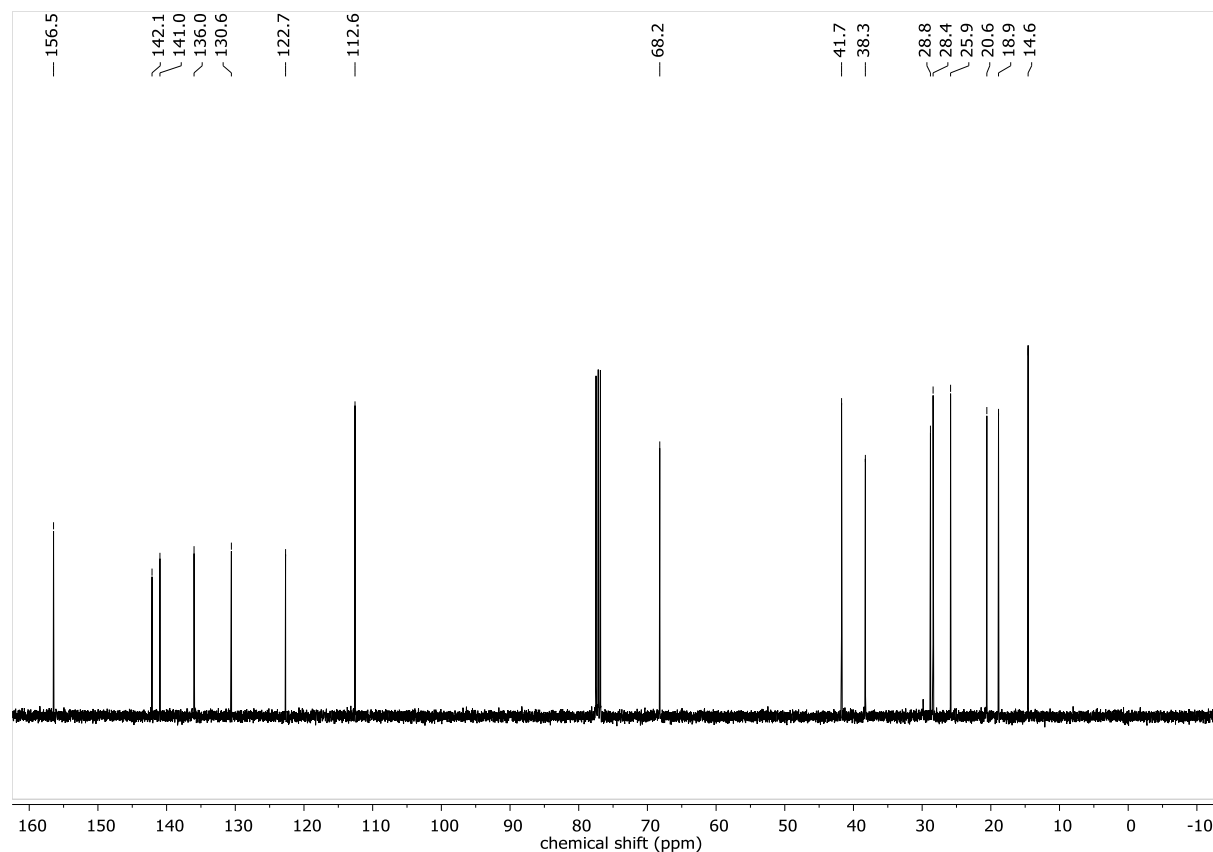

# C10-Zs

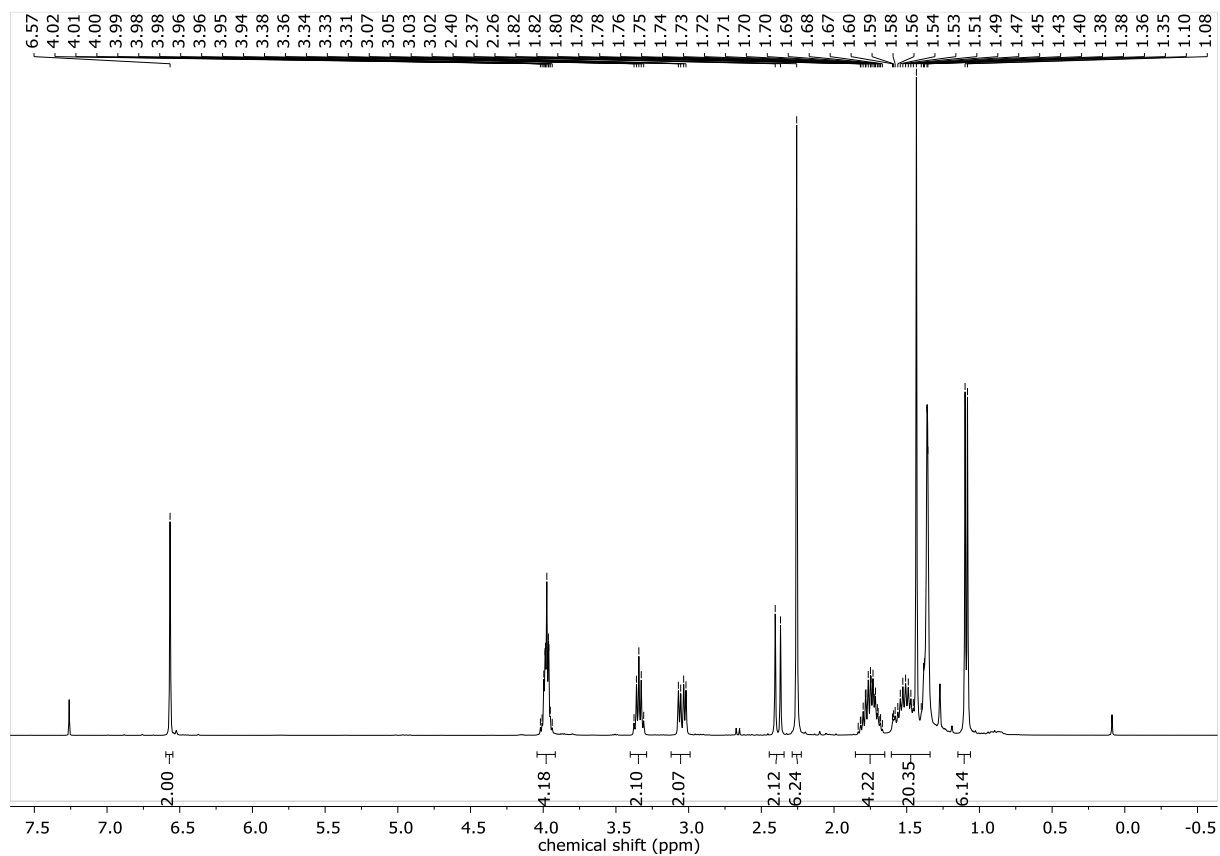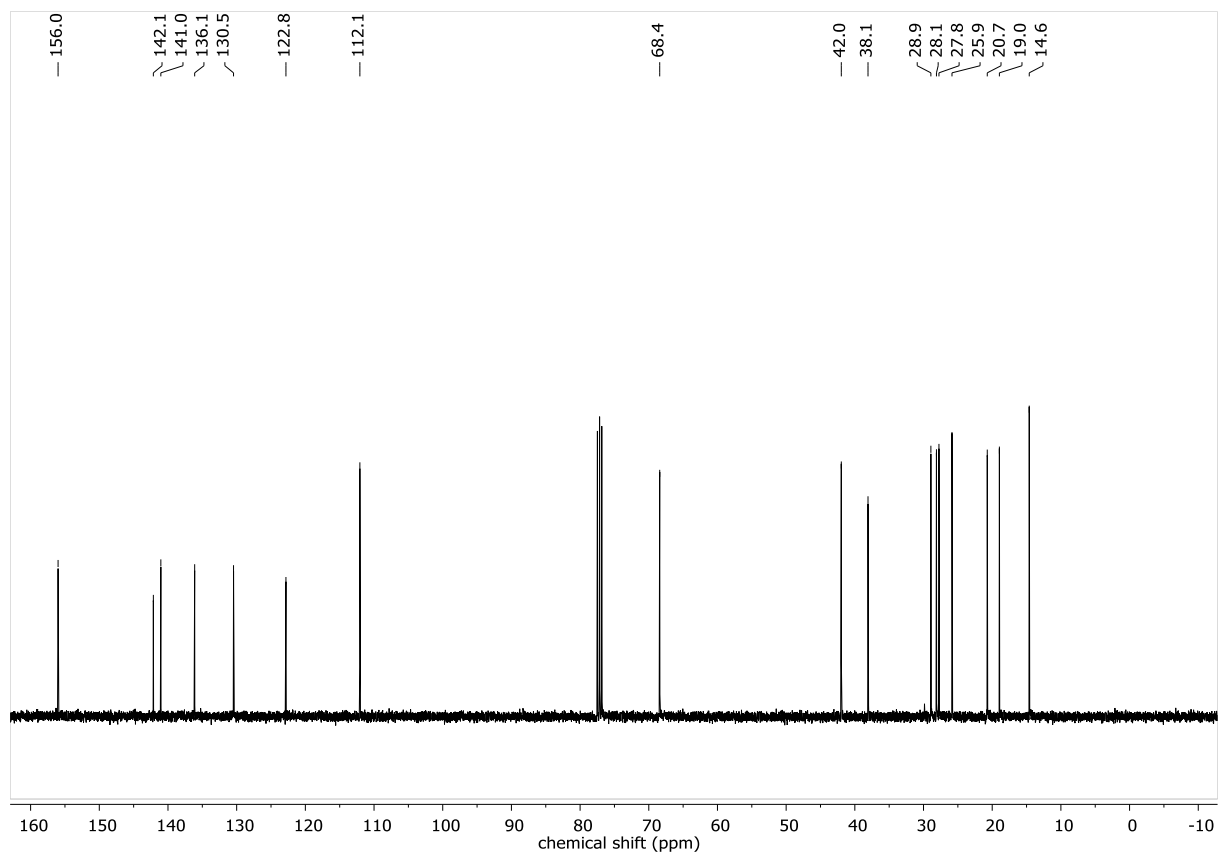

**C12-Zs**

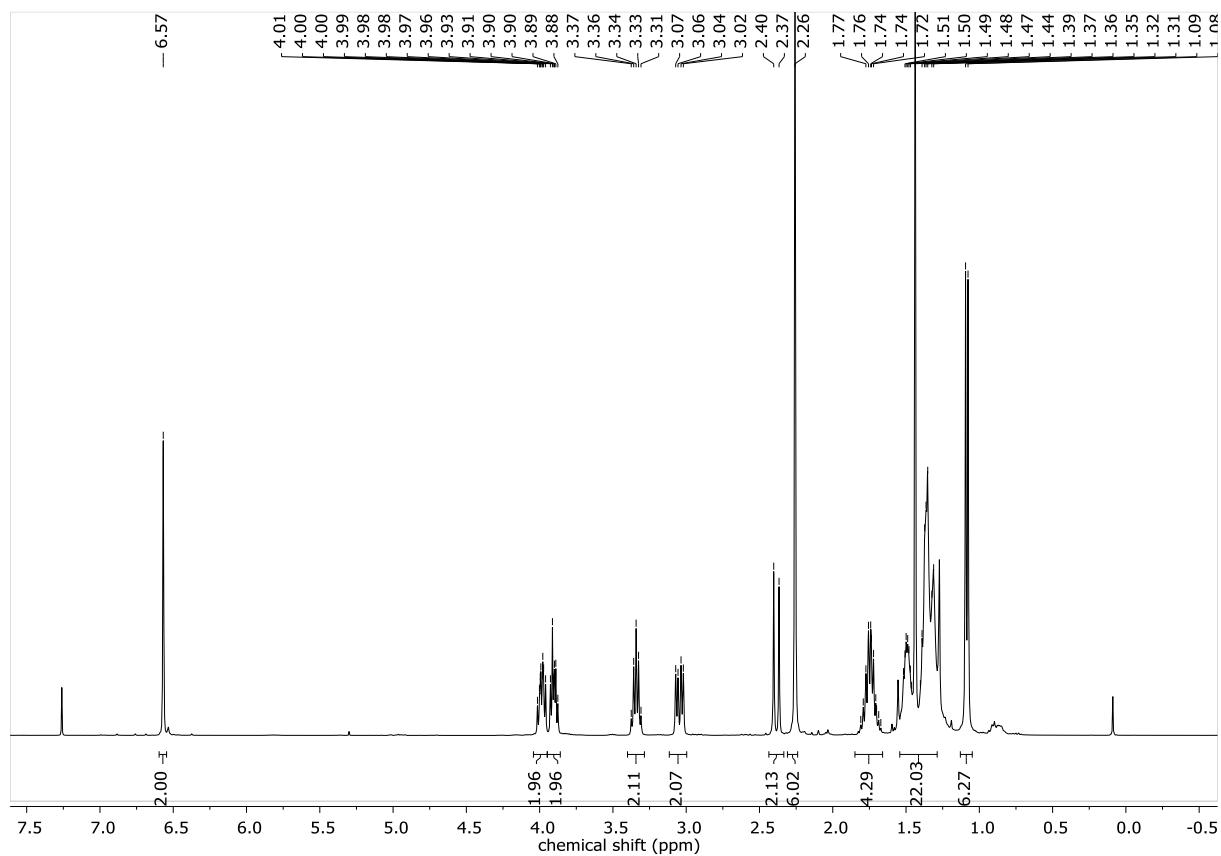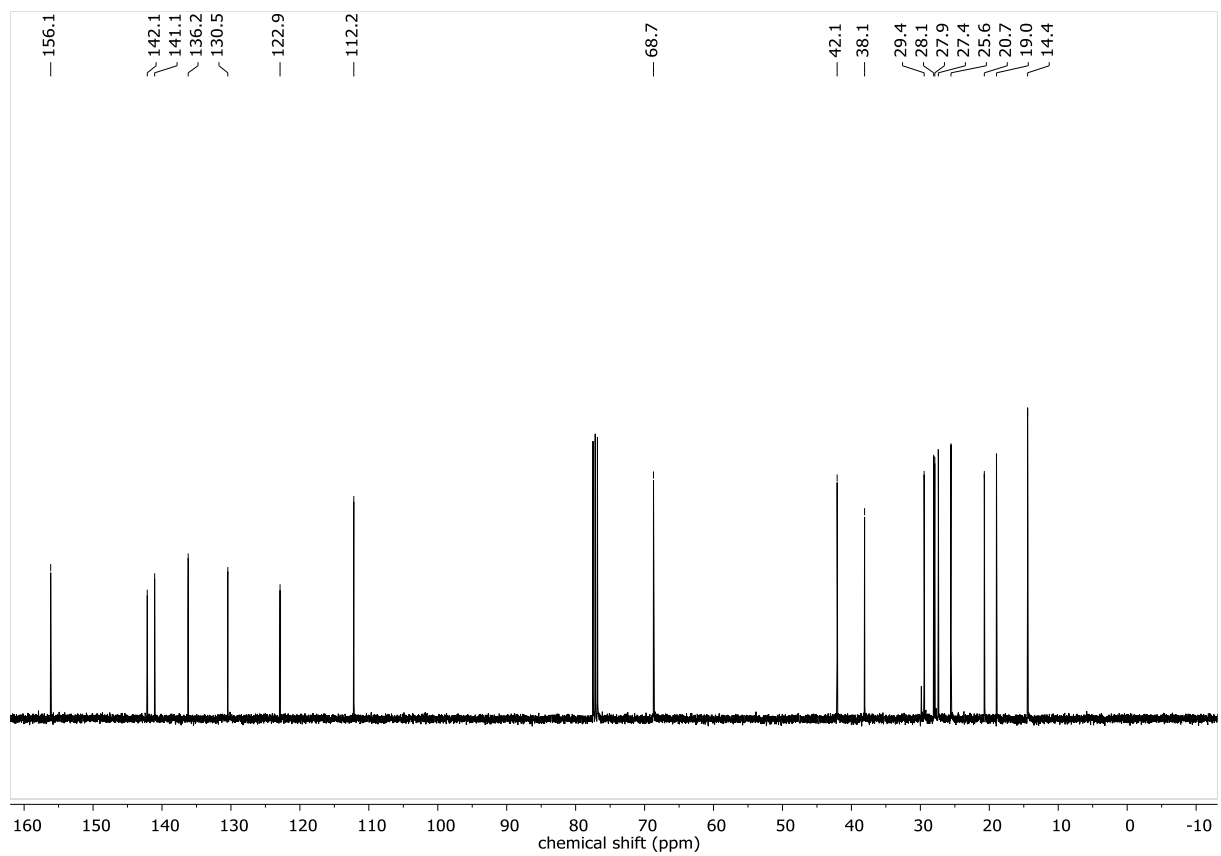

# C14-Zs

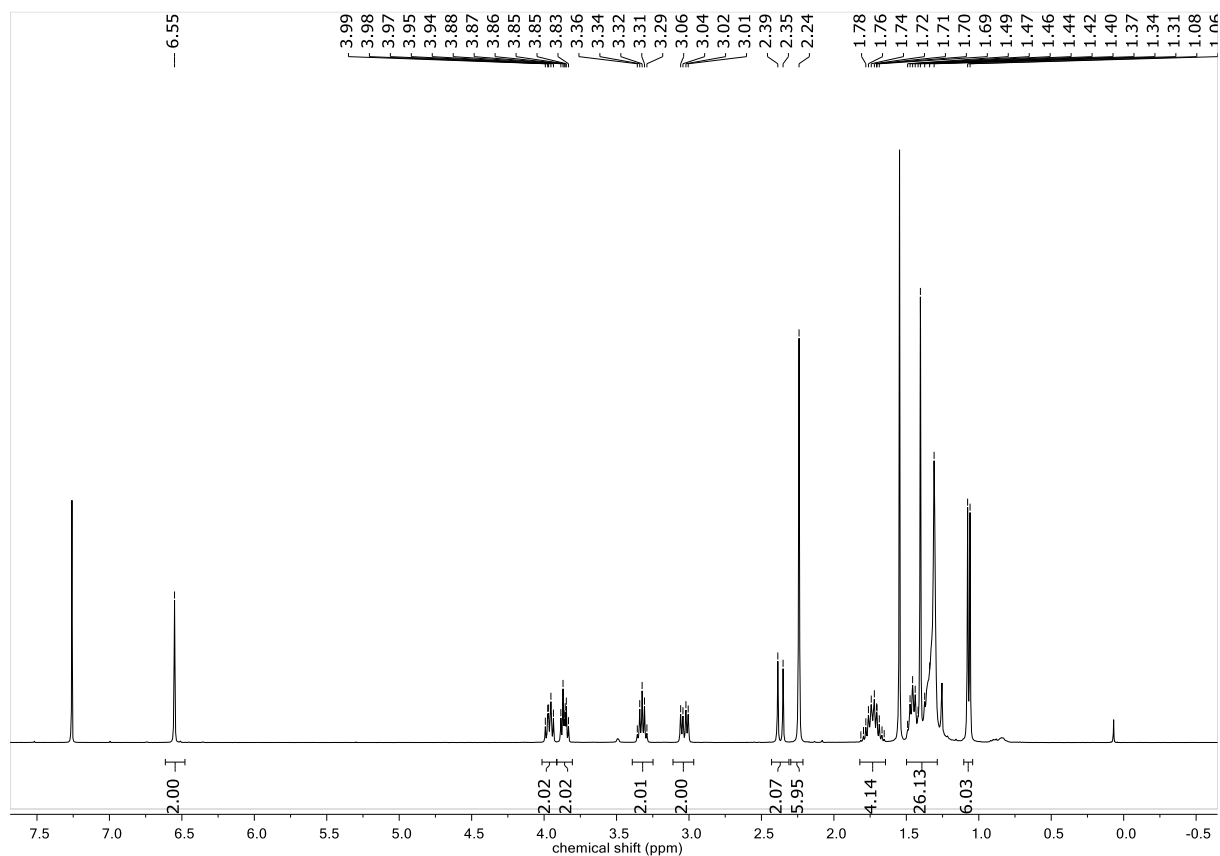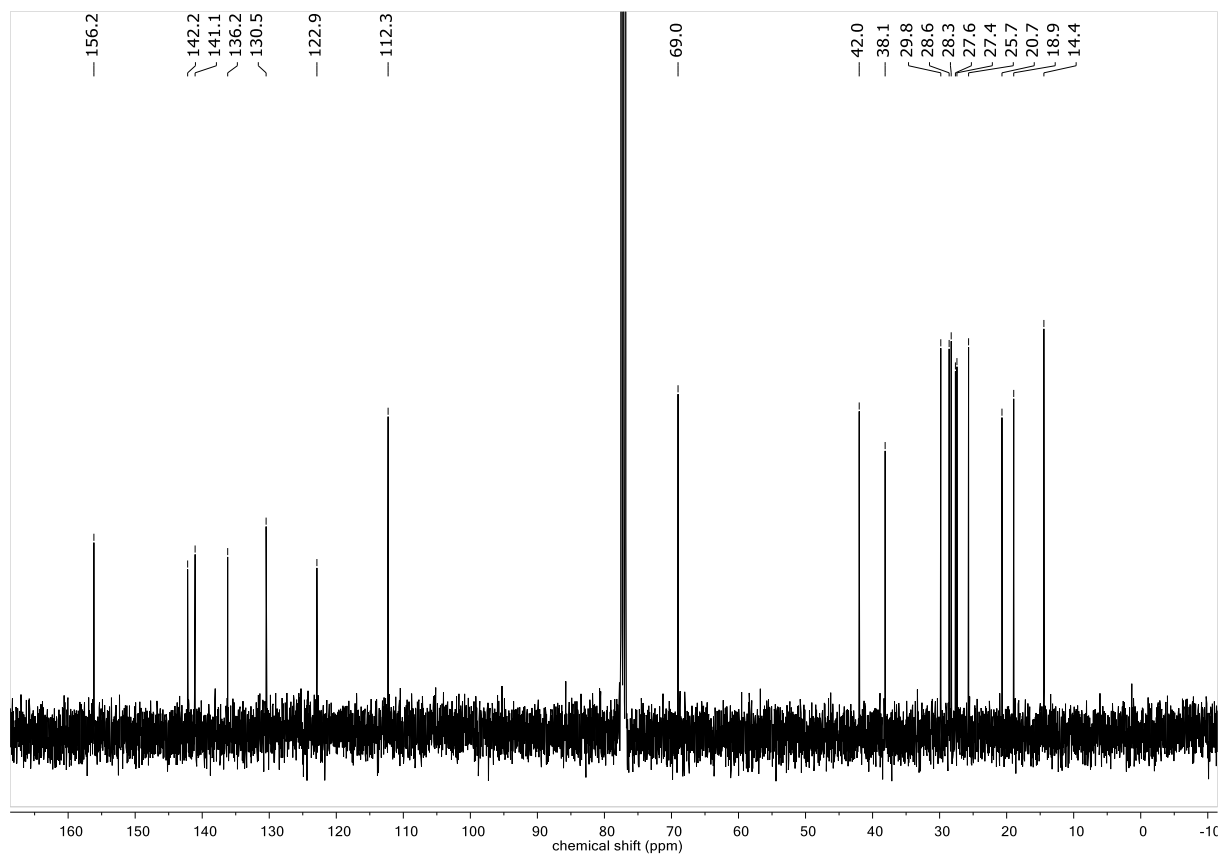

# C16-Zs

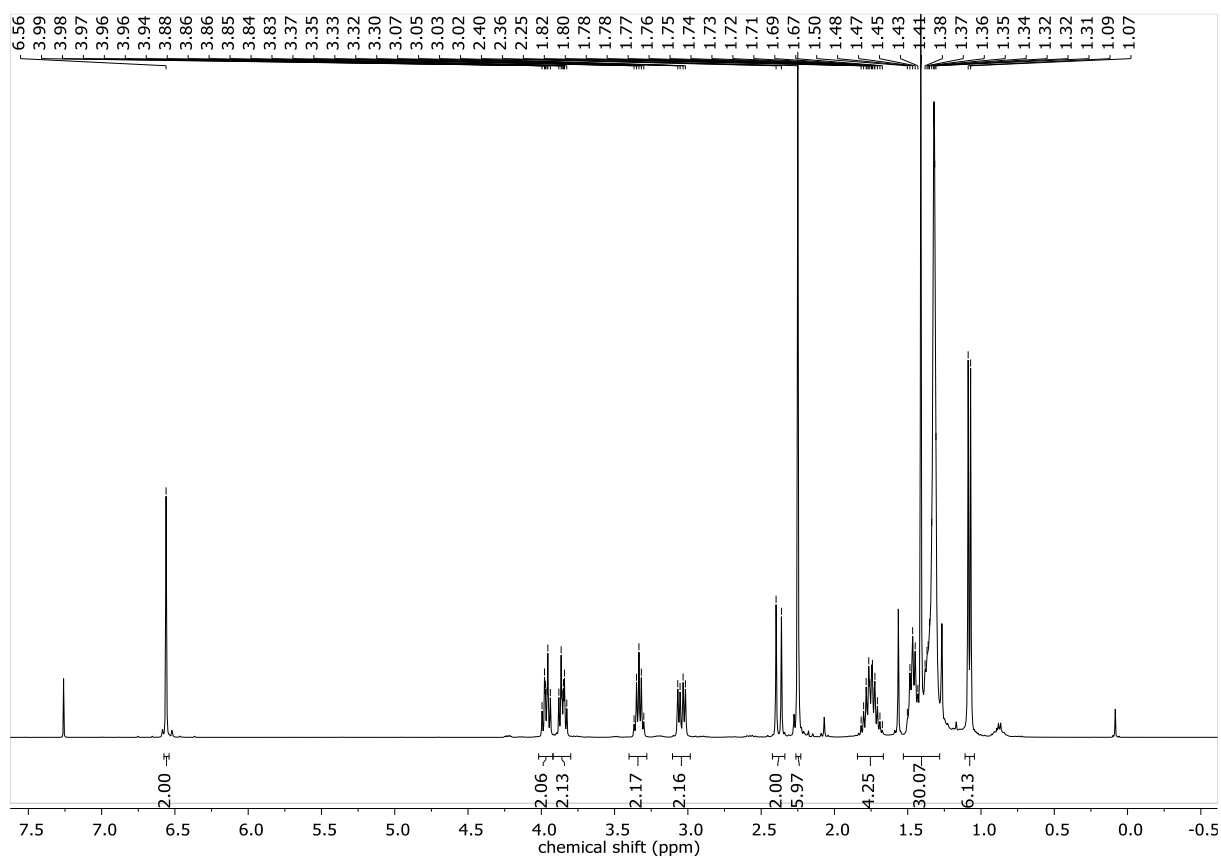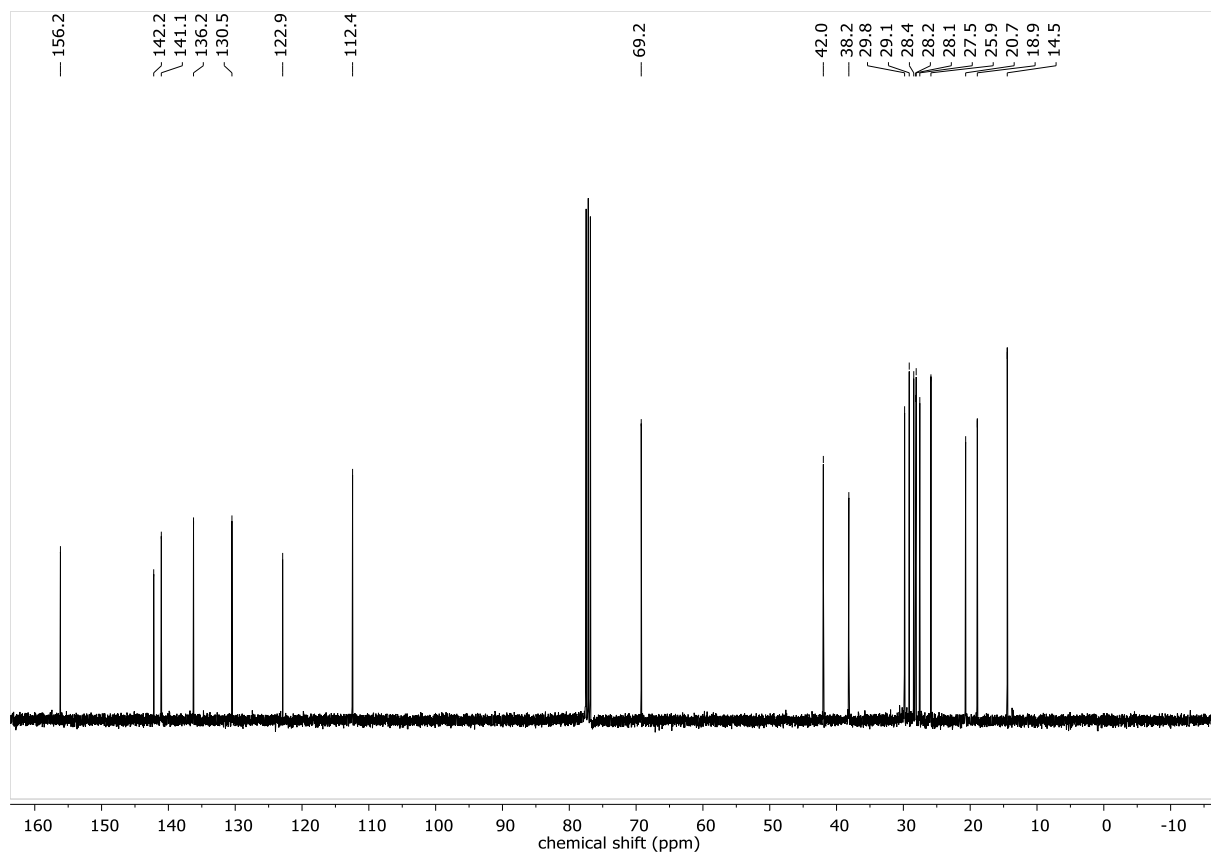



# C18-Zs

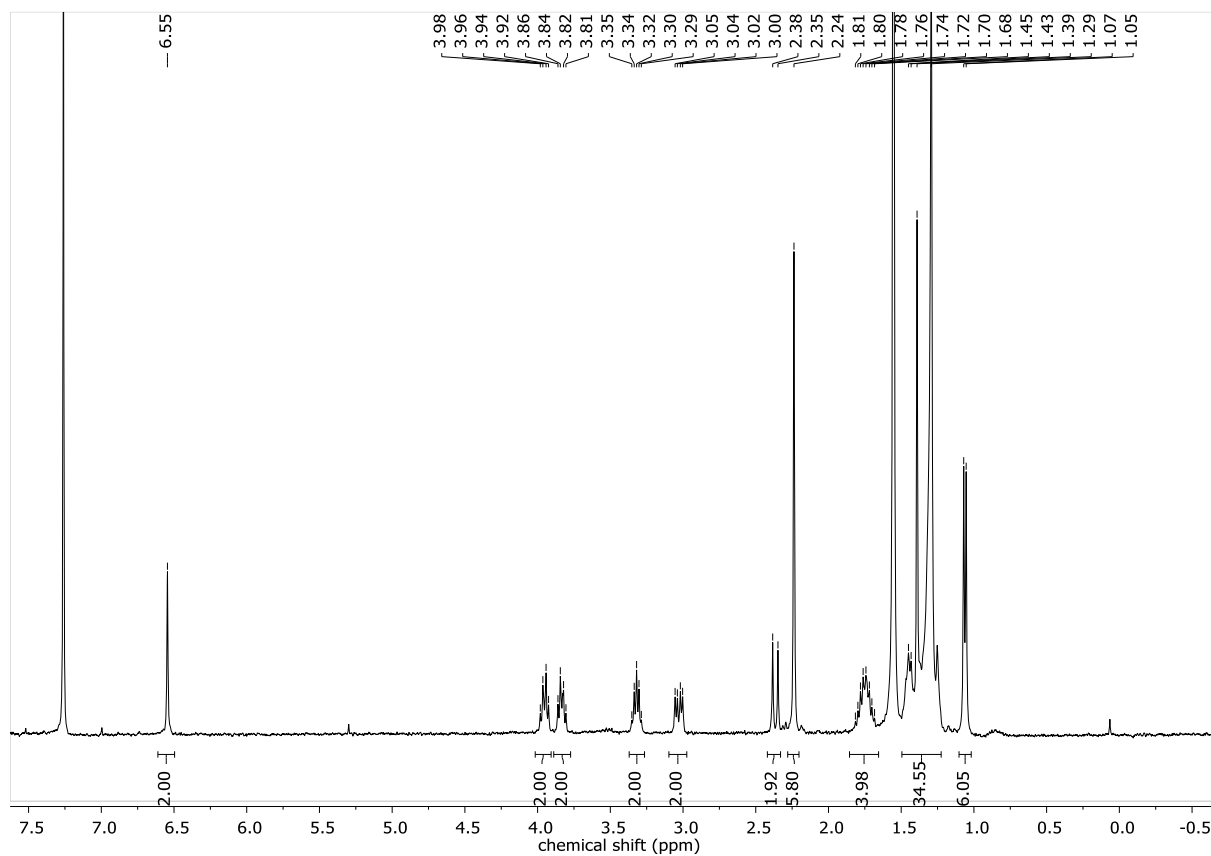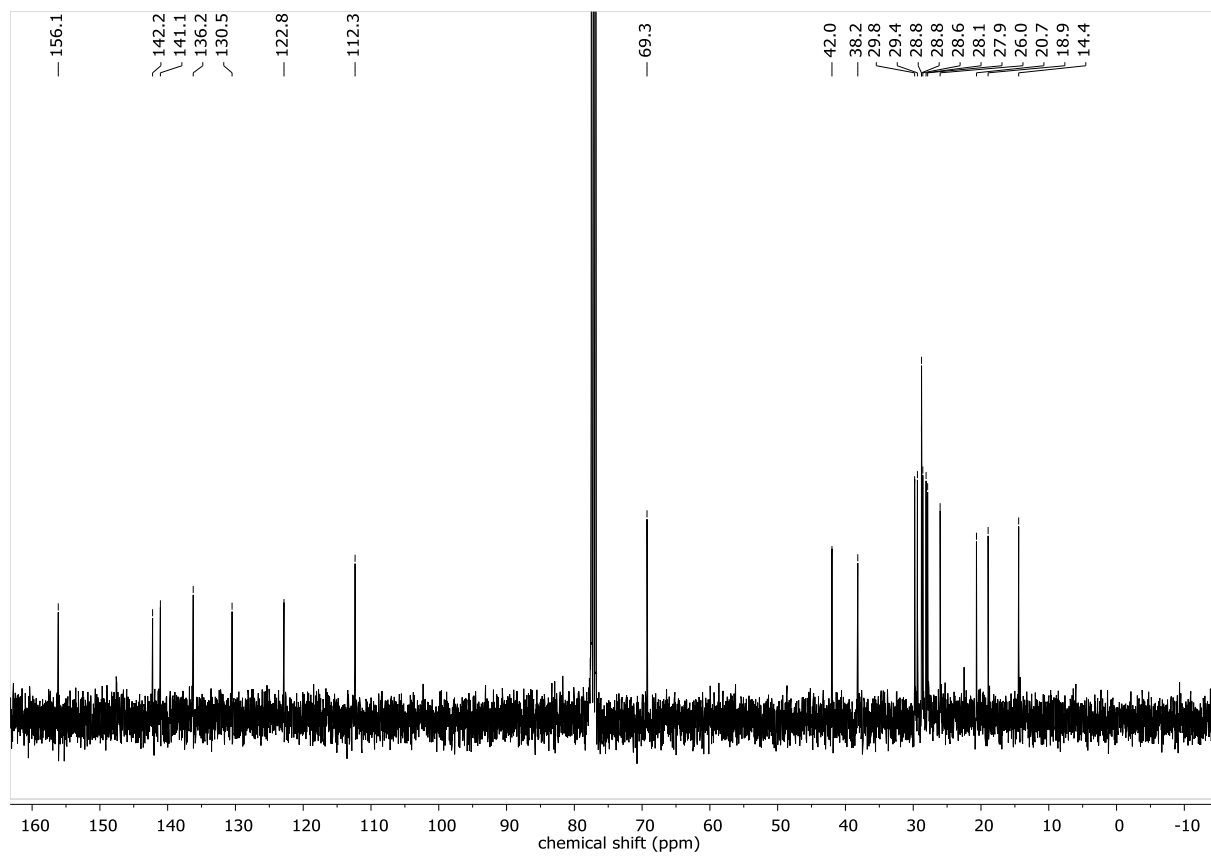

# C20-Zs

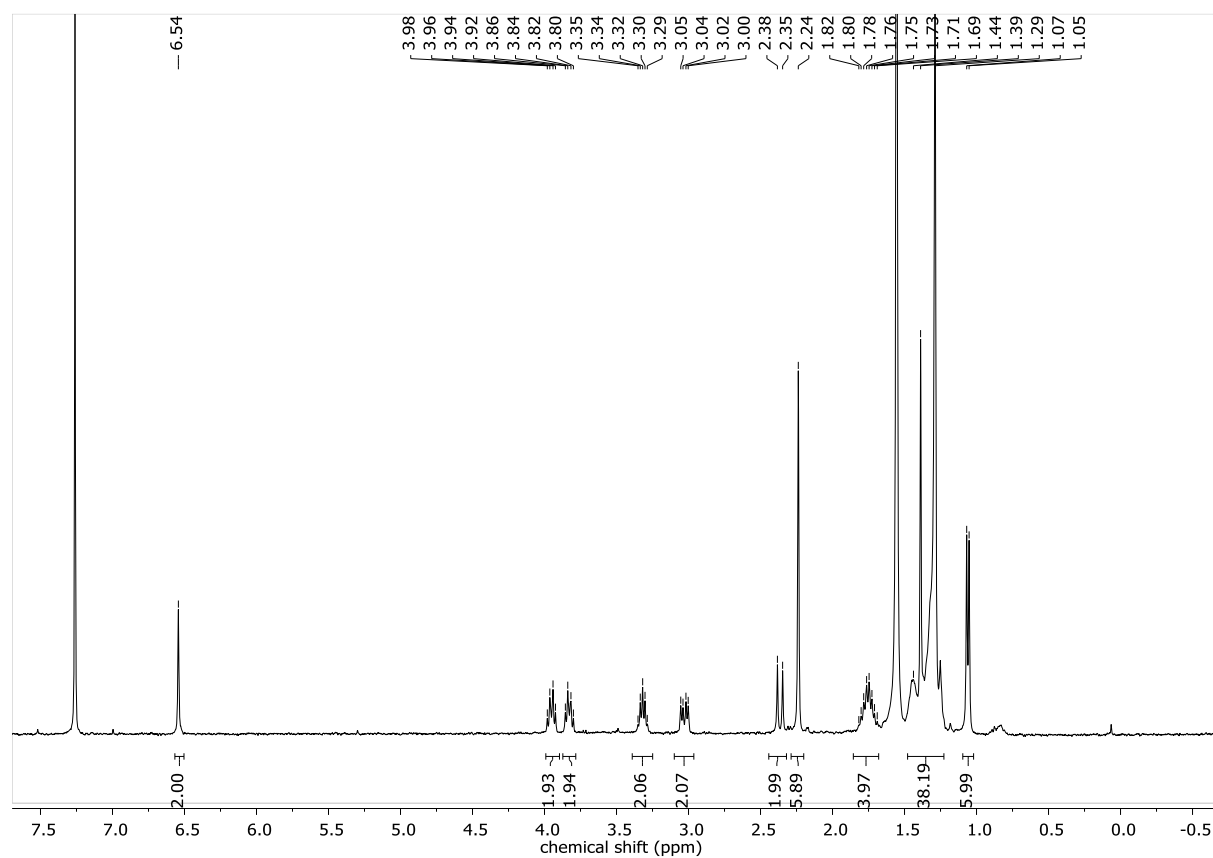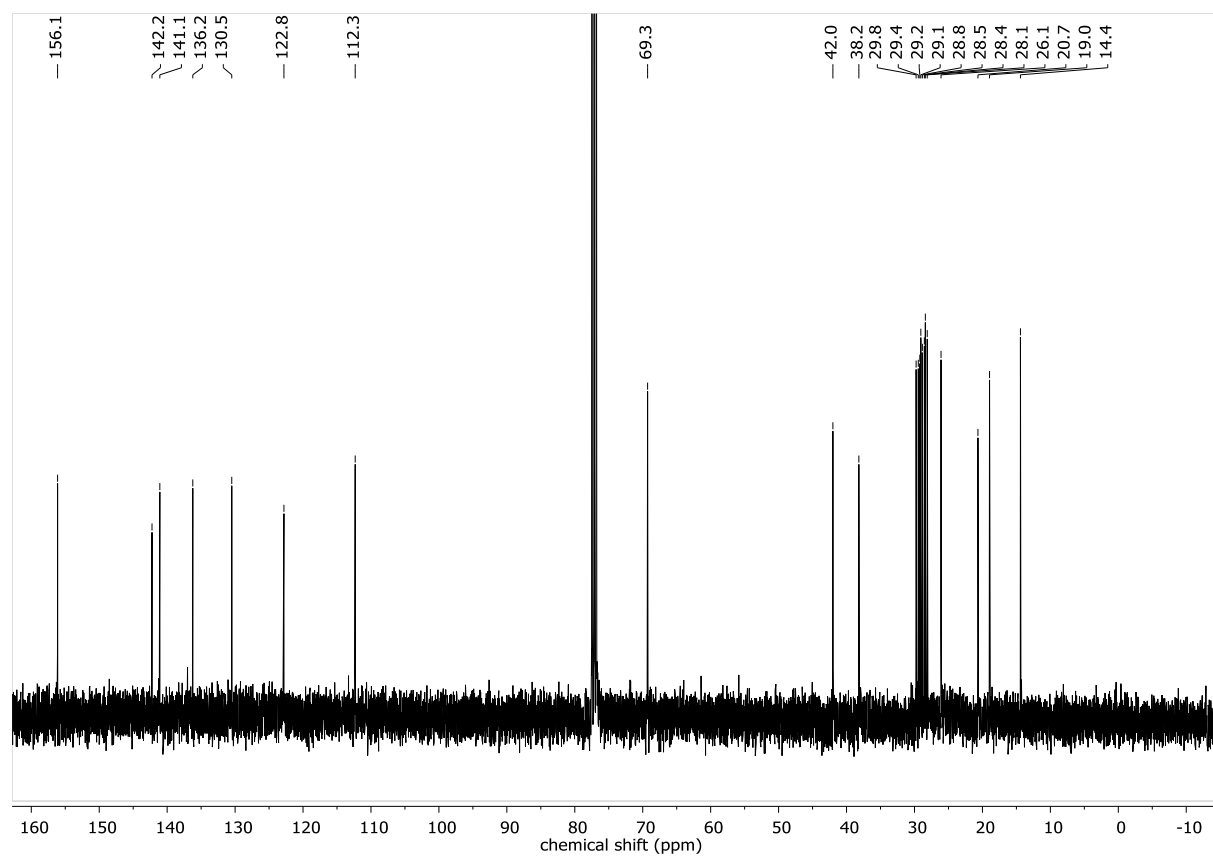

**C22-Zs**

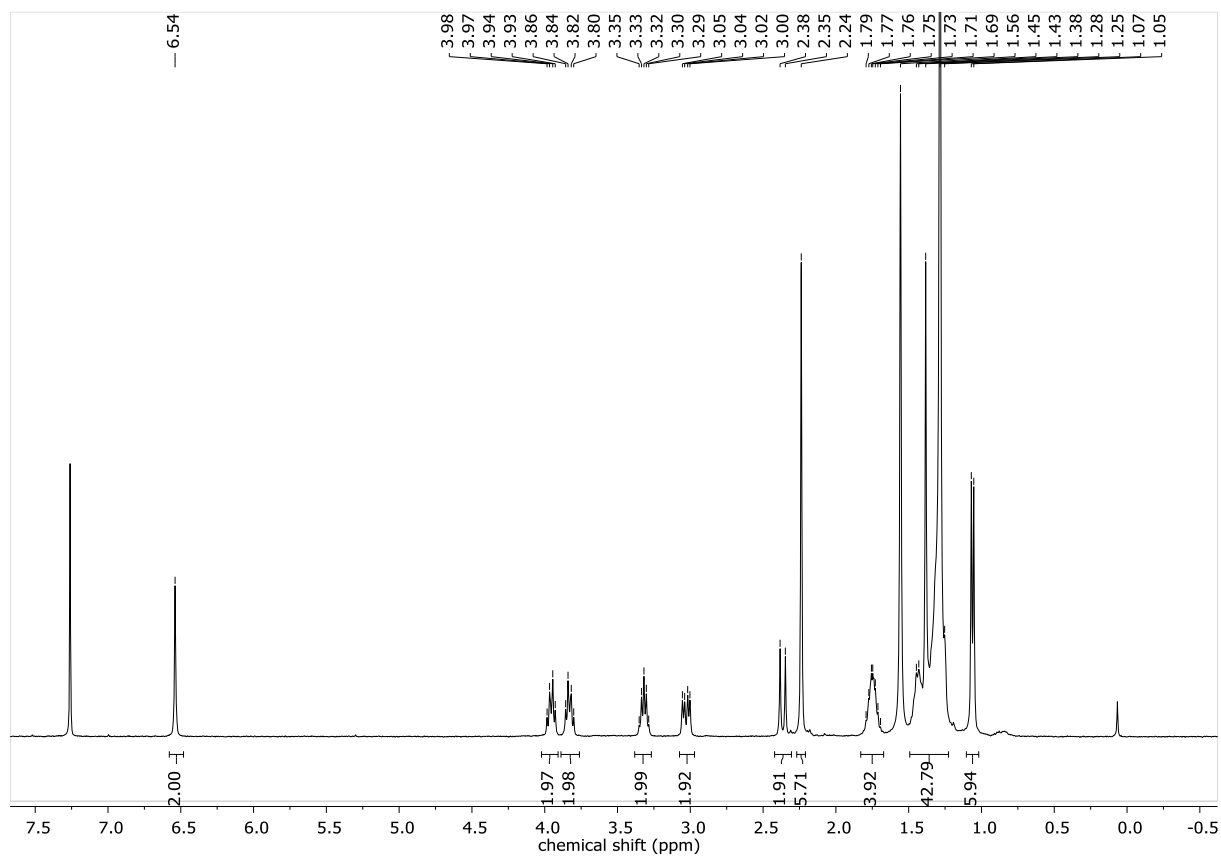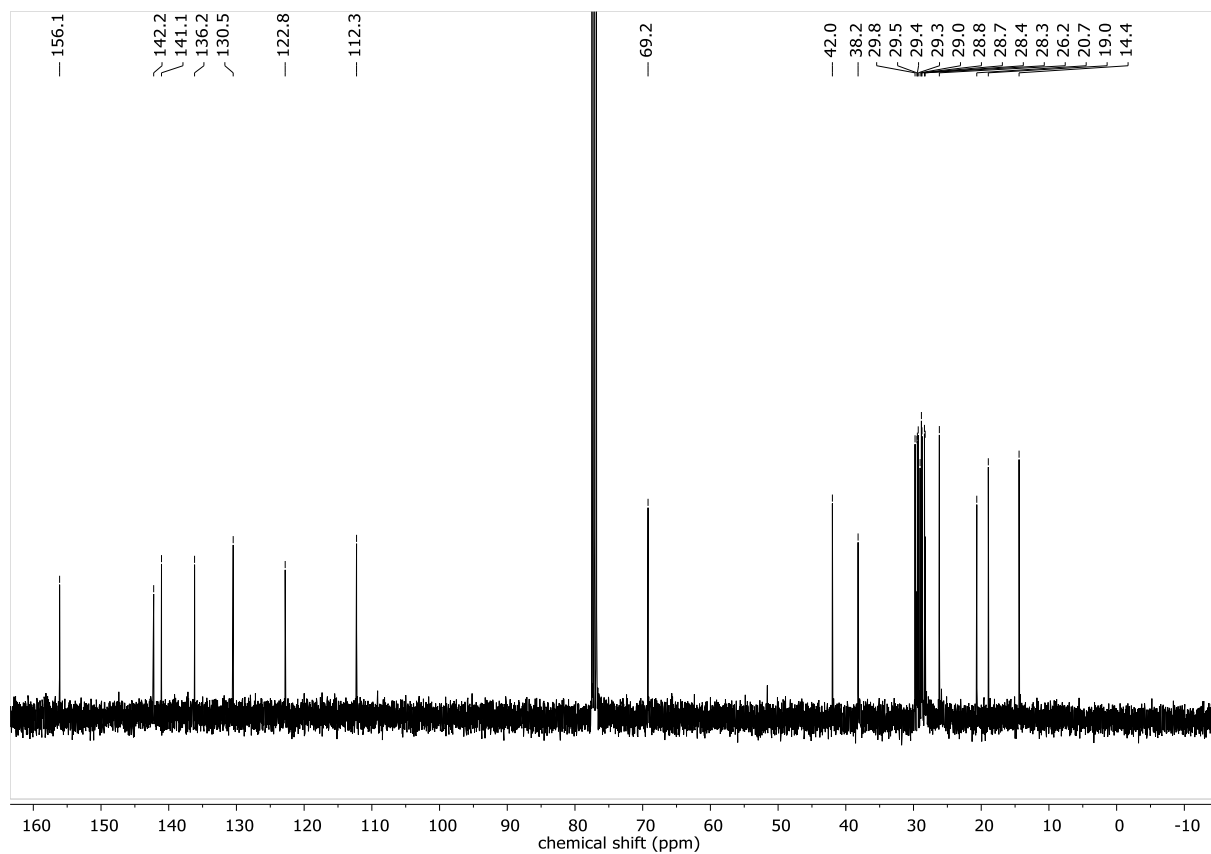

Supplement: ANIE-61-0-s001.pdf [file ANIE-61-0-s001.pdf]
